# Supplementary material for: Stereoselective addition of Grignard reagents to new P-chirogenic N-phosphinoylimines
Source: Royal Society of Chemistry journal article supplement (doi:10.1039/b915781f), 2010-01-01

## Supporting Information

### First Stereoselective Addition of Grignard Reagents to *P*-Chirogenic *N*-Phosphinoylimines

Irene Notar Francesco<sup>a,b</sup>, Alain Wagner<sup>\*b</sup>, and Françoise Colobert<sup>\*a</sup>

<sup>a</sup>*Laboratoire de Stéréochimie (UMR CNRS 7509), Université de Strasbourg (ECPM), 25 rue Bequerel, F-67087 Strasbourg Cedex 2, France*

<sup>b</sup>*NovALIX-Pharma, Boulevard Sébastien Brant, BP 30170, F-67405, Illkirch Cedex, France*

[francoise.colobert@unistra.fr](mailto:francoise.colobert@unistra.fr)

## Table of Contents

|                                                                                                                           |    |
|---------------------------------------------------------------------------------------------------------------------------|----|
| 1. General                                                                                                                | 2  |
| 2. Preparation of substrates                                                                                              | 3  |
| 3. 1,2 Grignard additions to <i>P</i> - <i>tert</i> -butyl- <i>P</i> -phenyl- <i>N</i> -phosphinoyl benzaldimine <b>1</b> | 4  |
| 3.1 Experimental procedure                                                                                                | 4  |
| 3.2 Characterization data of compounds <b>6</b> and <b>7 a-m</b>                                                          | 5  |
| 4. <sup>1</sup> H-, <sup>13</sup> C- and <sup>31</sup> P-NMR Spectra                                                      | 12 |

## 1. General.

All the solvents used were dried and freshly distilled in argon atmosphere. Tetrahydrofuran and diethyl ether were distilled under sodium and benzophenone, toluene and heptane were distilled over sodium, dichloromethane and 1,2-dichloroethane were dried with calcium hydride and fractionally distilled. Chlorobenzene was simply dried with activated Linde 4Å molecular sieves.

Benzaldehyde, triethylamine and benzylamine were distilled just before use. Palladium on carbon (10%, 50% wet with water for safety) was purchased from Acros and stored in a drying device. Titanium tetrachloride was used like a 1 M solution in dichloromethane. Alkyl- and aryl- magnesium halides solutions were purchased from Aldrich and Acros or prepared just by adding a solution of corresponding organohalide on the activated magnesium and refluxing the resulting solutions for 2h.

All the reactions were performed under argon atmosphere and in flamed under high vacuum flasks. Thin-layer chromatography (TLC) was carried out on aluminum plates silica gel 60 F<sub>254</sub> purchased from Merck. Chromatography columns were performed with Merck silica gel Si 60 (40-63µm). All hydrogenation reactions were carried out in a 75 ml standard stainless steel autoclave.

Compounds **4** and **5** were prepared according to literature procedure<sup>1</sup>.

<sup>1</sup>H, <sup>13</sup>C and large band decoupled <sup>31</sup>P nuclear magnetic resonance (NMR) spectra were recorded at 300, 75 and 162 MHz, respectively. Chemical shifts are reported in δ units, parts per million (ppm) from tetramethylsilane and were measured relative to the signals for residual chloroform (7.26 ppm for proton and 77.00 for carbon NMR spectra). Coupling constants *J* are given in Hz. Coupling patterns are abbreviated as, for example, br (broad) s (singlet), d (doublet), t (triplet) and m (multiplet).

Mass spectra were recorded by HRMS by electrospray ionization method obtained with a microTOF LC Brucker Daltonics microTOF LC from Brucker Daltonics apparatus.

Melting ranges (m.p.) given were found to be reproducible after resolidification.

<sup>1</sup> Haynes, R. K.; Au-Yeung, T-L.; Chan, W-K.; Lam, W-L.; Li, Z-Y.; Yeung, L-L.; Chan, A. S. C.; Li, P.; Koen, M.; Mitchell, C. R.; Vonwiller, S. C. *Eur. J. Org. Chem.*, **2000**, 3205-3216, and cited references.

## 2. Preparation of substrates.

### (±)-6

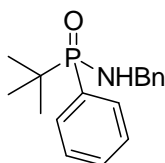

To a solution of triethylamine (0.39 mL, 2.8 mmol) and bromide **5** (0.326 g, 1.25 mmol) in Et<sub>2</sub>O (10 mL) was added benzylamine (0.687 mL, 6.25 mmol) at room temperature. The mixture was stirred for 16 h and the white precipitate of ammonium bromide was filtered off. The filtrate was then poured into a saturated NH<sub>4</sub>Cl solution (15 mL). The aqueous layer was extracted with Et<sub>2</sub>O (3x15 mL) and the combined organic phases were dried over magnesium sulfate and concentrated *in vacuo*. Silica gel column chromatography (EtOAc/cyclohexane 4:1) of the crude mixture afforded pure **3** (261 mg, 0.91 mmol, 73% yield) as a white solid. (mp = 148.7-151.3 °C) <sup>1</sup>H NMR (300 MHz, CDCl<sub>3</sub>) δ 7.896-7.271(m, 10H, C-H arom.), 4.192 (ABd, *J*<sub>AB</sub> = 79.3 Hz, <sup>3</sup>*J*<sub>P-H</sub> = 3 Hz, 2H, O=P-CH<sub>2</sub>-NH-Ph), 2.967 (br s, 1H, O=P-NH-CH<sub>2</sub>-Ph), 1.169 (d, <sup>3</sup>*J*<sub>P-H</sub> = 15 Hz, 9H, *t*-Bu); <sup>13</sup>C NMR (75 MHz, CDCl<sub>3</sub>) δ 139.934 (d, <sup>3</sup>*J*<sub>P-C</sub> = 7.75 Hz, C quat. arom.), 133.792 (d, <sup>2</sup>*J*<sub>P-C</sub> = 8.32 Hz, 2 C-H arom.), 131.760 (d, <sup>4</sup>*J*<sub>P-C</sub> = 2.4 Hz, C-H arom.), 128.751 (d, <sup>1</sup>*J*<sub>P-C</sub> = 58.72 Hz, C quat. arom.), 128.582 (s, 2 C-H arom.), 128.209 (d, <sup>3</sup>*J*<sub>P-C</sub> = 11.62 Hz, 2 C-H arom.), 127.662 (s, 1 C-H arom.), 127.325 (s, 2 C-H arom.), 44.376 (d, <sup>2</sup>*J*<sub>P-C</sub> = 2.7 Hz, -CH<sub>2</sub>-), 32.165 (d, <sup>1</sup>*J*<sub>P-C</sub> = 89.1 Hz, C quat. *t*-Bu.), 24.944 (s, 3 -CH<sub>3</sub>, *t*-Bu); <sup>31</sup>P NMR (162 MHz, CDCl<sub>3</sub>) δ 43.2849. HMRS calculated for C<sub>17</sub>H<sub>22</sub>NNaOP 310.1331, found 310.1306.

(*R*)-(-)-**6**: [α]<sub>D</sub><sup>20</sup> = -7.4° (c 1, MeOH).

### (±)-7

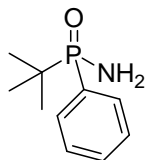

Compound **6** (200 mg, 0.7 mmol), Pd/C (20 mg) and EtOH (5 mL) were placed in the autoclave and flushed three times with hydrogen before pressuring up to 20 Bar. The mixture was stirred at room temperature for 24 h and then depressurized. The solution was filtered through a Celite pad that was thoroughly rinsed with ethanol. The solvent was removed *in vacuo* affording pure phosphinamide **7** (0.135 g, 0.69 mmol, 98 % yield) as a colorless needles. (mp = 128.1-133.5) <sup>1</sup>H NMR (300 MHz,

$\text{CDCl}_3$ )  $\delta$  7.873-7.413 (m, 5H, C-H arom.), 2.897 (br s, 2H,  $-\text{NH}_2$ ) 1.134 (d,  $^3J_{\text{P-H}} = 15.3$  Hz, 9H, *t*-Bu);  $^{13}\text{C}$  NMR (75 MHz,  $\text{CDCl}_3$ )  $\delta$  133.191 (d,  $^2J_{\text{P-C}} = 8.32$  Hz, 2 C-H arom.), 131.842 (d,  $^4J_{\text{P-C}} = 2.48$  Hz, C-H arom.), 130.04 (d,  $^1J_{\text{P-C}} = 115.09$  Hz, C quat. arom.), 128.079 (d,  $^3J_{\text{P-C}} = 11.55$  Hz, 2 C-H arom.), 32.304 (d,  $^1J_{\text{P-C}} = 92.25$  Hz, C quat. *t*-Bu.), 24.672 (s, 3  $-\text{CH}_3$ , *t*-Bu);  $^{31}\text{P}$  NMR (162 MHz,  $\text{CDCl}_3$ )  $\delta$  43.5063. HMRS calculated for  $\text{C}_{10}\text{H}_{16}\text{NNaOP}$  220.0862, found 220.0850.

(*R*)-(-)-**7**:  $[\alpha]_{\text{D}}^{20} = -12.6$  (c 1,  $\text{CHCl}_3$ ).

( $\pm$ )-**1**

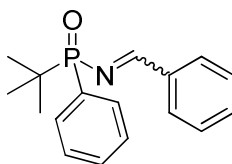

To a solution of benzaldehyde (0.08 ml, 0.76 mmol), *P*-*tert*-butyl-*P*-phenyl phosphinamide (0.150 mg, 0.76 mmol) and triethylamine (0.32 ml, 2.28 mmol) in dichloromethane at 0°C was added  $\text{TiCl}_4$  (0.38 ml, 0.38 mmol) dropwise. The reaction mixture was allowed to stir for 2 h before the solvent was removed *in vacuo*. The yellow oily solid was diluted with ethyl acetate and the precipitate filtered through Celite. The filtrate was concentrated *in vacuo*. Crude imine was purified by flash-chromatography (EtOAc 100%) affording pure phosphinoyl benzaldimine **1** (162 mg, 75% yield) that was isolated as one single isomer. White solid (mp = 176.3-177.7).  $^1\text{H}$  NMR (300 MHz,  $\text{CDCl}_3$ )  $\delta$  9.21 (d,  $^3J_{\text{P-H}} = 29.7$  Hz, 1H,  $\text{N}=\text{C}-\text{H}$ ), 8.01-7.44 (m, 10H, C-H arom), 1.19 (d,  $^3J_{\text{P-H}} = 15.3$  Hz, 9H, *t*-Bu);  $^{13}\text{C}$  NMR (75 MHz,  $\text{CDCl}_3$ )  $\delta$  174.251 (d,  $^2J_{\text{P-C}} = 8.1$  Hz,  $\text{N}=\text{C}-\text{H}$ ), 136.032 (d,  $^3J_{\text{P-C}} = 23.25$  Hz, C quat. arom.), 133.193 (d,  $^2J_{\text{P-C}} = 14.77$  Hz, 2 C-H arom.), 132.994 (s, 2 C-H arom.), 131.645 (d,  $^4J_{\text{P-C}} = 2.62$  Hz, C-H arom.), 130.141 (d,  $^1J_{\text{P-C}} = 113.02$  Hz, C quat. arom.), 129.901 (s, 1 C-H arom.), 128.871 (s, 2 C-H arom.), 127.968 (d,  $^3J_{\text{P-C}} = 11.17$  Hz, 2 C-H arom), 32.893 (d,  $^1J_{\text{P-C}} = 88.35$  Hz, C quat. *t*-Bu.), 24.428 (s, 3  $-\text{CH}_3$ , *t*-Bu);  $^{31}\text{P}$  NMR (162 MHz,  $\text{CDCl}_3$ )  $\delta$  44.0214. HMRS calculated for  $\text{C}_{17}\text{H}_{20}\text{NNaOP}$  308.1175 found 308.1154.

(*R*)-(+)-**1**:  $[\alpha]_{\text{D}}^{20} = +84.9^\circ$  (c 1.88, Acetone).

### 3. 1, 2 Grignard additions to *P*-*tert*-butyl-*P*-phenyl-*N*-phosphinoyl benzaldimine (**1**)

#### 3.1 General experimental procedure.

A representative experimental procedure is shown by the synthesis of **2a** and **3a** adducts. Methyl magnesium bromide (3 M solution in diethyl ether, 3 equiv., 0.6 mmol, 200  $\mu\text{L}$ ) was added dropwise at

0°C to a solution of **1** (1equiv., 0.2 mmol, 57 mg) in dichloromethane (1.5 mL). The mixture was stirred at room temperature for 3h, then cooled to 0°C, quenched with aqueous KHSO<sub>4</sub> (0.5 M, 10 mL) and extracted with ethyl acetate (10 mL x 3). The combined organic phases were washed once with brine (20 mL), dried over MgSO<sub>4</sub> and concentrated *in vacuo*. The slightly yellow oily solid was purified by flash chromatography (EtOAc 100%) affording the two diastereoisomers (major/minor = 85 : 15) **2a** and **3a** as colorless solid with 70 and 9% yield respectively.

### 3.2 Characterization data of compounds **2** and **3a-l**.

(*RP,R*)-(+)-**2a** (Major)

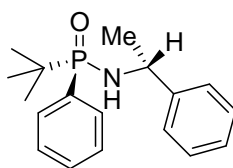

Colorless solid (mp = 164.1-167.6°C).  $[\alpha]_D^{20} = +42.8$  (c = 1, CHCl<sub>3</sub>). <sup>1</sup>H NMR (300 MHz, CDCl<sub>3</sub>)  $\delta$  7.672-7.206 (m, 10H, C-H arom.), 4.274 (brm, 1H, C-H), 2.86 (brm, 1H, N-H), 1.587 (d, *J* = 6.9 Hz, 1H, H-C-CH<sub>3</sub>), 1.141 (d, <sup>3</sup>*J*<sub>PH</sub> = 14.7 Hz, 9H, *t*-Bu); <sup>13</sup>C NMR (75 MHz, CDCl<sub>3</sub>)  $\delta$  145.362 (d, <sup>3</sup>*J*<sub>P-C</sub> = 7.12 Hz, C quat. arom.), 134.024 (d, <sup>2</sup>*J*<sub>P-C</sub> = 8.47 Hz, 2 C-H arom.), 131.574 (d, <sup>4</sup>*J*<sub>P-C</sub> = 2.4 Hz, C-H arom.), 129.952 (d, <sup>1</sup>*J*<sub>P-C</sub> = 48.37 Hz, C quat. arom.), 128.525 (s, 2 C-H arom.), 127.869 (d, <sup>3</sup>*J*<sub>P-C</sub> = 11.85 Hz, 2 C-H arom.), 126.971 (s, 1 C-H arom.), 125.765 (s, 2 C-H arom.), 50.712 (d, <sup>2</sup>*J*<sub>P-C</sub> = 2.55 Hz, HN-CH-), , 32.089 (d, <sup>1</sup>*J*<sub>P-C</sub> = 88.72 Hz, C quat. *t*-Bu.), 24.950 (s, 3 -CH<sub>3</sub>, *t*-Bu); <sup>31</sup>P NMR (162 MHz, CDCl<sub>3</sub>)  $\delta$  42.30. HMRS calculated for C<sub>18</sub>H<sub>24</sub>NNaOP 324.1488, found 324.1456.

(*RP,S*)-(-)-**3a** (Minor)

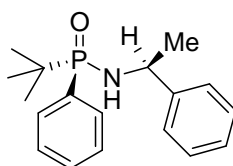

Colorless solid (mp = 151.4-153.8°C).  $[\alpha]_D^{20} = -39.8^\circ$  (c = 1.25, CHCl<sub>3</sub>). <sup>1</sup>H NMR (300 MHz, CDCl<sub>3</sub>)  $\delta$  7.92-7.21 (m, 10H, C-H arom.), 4.512 (sestet, <sup>2</sup>*J*<sub>PH</sub> = <sup>3</sup>*J*<sub>H-C-N-H</sub> = *J*<sub>H-C-Me</sub> = 7.2 Hz, 1H, C-H), 2.855 (t, <sup>2</sup>*J*<sub>PH</sub> = <sup>3</sup>*J*<sub>H-C-N-H</sub> = 8.7 Hz, 1H, N-H), 1.402 (d, *J* = 6.6 Hz, 1H, H-C-CH<sub>3</sub>), 1.085 (d, <sup>3</sup>*J*<sub>PH</sub> = 15 Hz, 9H, *t*-Bu); <sup>13</sup>C NMR (75 MHz, CDCl<sub>3</sub>)  $\delta$  145.514 (d, <sup>3</sup>*J*<sub>P-C</sub> = 4.27 Hz, C quat. arom.), 133.447 (d, <sup>2</sup>*J*<sub>P-C</sub> = 8.45 Hz, 2 C-H arom.), 131.484 (d, <sup>4</sup>*J*<sub>P-C</sub> = 2.49 Hz, C-H arom.) , 131.026 (d, <sup>1</sup>*J*<sub>P-C</sub> = 115.87 Hz, C quat. arom.), 128.492 (s, 2 C-H arom.), 127.963 (d, <sup>3</sup>*J*<sub>P-C</sub> = 11.55 Hz, 2 C-H arom.), 126.996 (s, 1 C-H arom.),

126.185 (s, 2 C-H arom.), 49.871(d,  $^2J_{P-C} = 2.41$  Hz, HN-CH-), 32.448 (d,  $^1J_{P-C} = 88.72$  Hz, C quat. *t*-Bu.), 24.948 (d,  $^3J_{P-C} = 4.27$  Hz, HC-CH<sub>3</sub>), 24.835;  $^{31}\text{P}$  NMR (162 MHz, CDCl<sub>3</sub>)  $\delta$  40.5. HMRS calculated for C<sub>18</sub>H<sub>24</sub>NNaOP 324.1488, found 324.1461.

Addition of *i*-PrMgBr: **2b-2b'**/**3b-3b'**

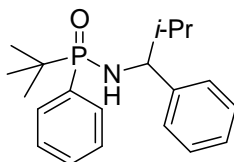

Major/minor = 75 : 25. 98% Yield, white solid (mp = 178.3-182.1°C).  $^1\text{H}$ -NMR (300 MHz, CDCl<sub>3</sub>)  $\delta$  7.868-7.00 (m, 10H, C-*H* arom. minor + major), 4.126 (brm, 1H, C-*H* major), 3.859 (brm, 1H, C-*H* minor), 3.147 (brm, 1H, N-*H* minor), 3.019 (brm, 1H, N-*H* major), 2.039 (m, 1H, *H*-C(CH<sub>3</sub>)<sub>2</sub> minor), 1.935(m, 1H, *H*-C(CH<sub>3</sub>)<sub>2</sub> major), 1.143 (d,  $^3J_{PH} = 15$  Hz, 9H, *t*-Bu minor), 1.02 (d,  $J = 6.9$  Hz, 3H, H-C-CH<sub>3</sub> minor), 1.015 (d,  $^3J_{PH} = 15$  Hz, 9H, *t*-Bu major) 0.874 (d,  $J = 6.9$  Hz, 3H, *H*-C-CH<sub>3</sub> major), 0.814 (d,  $J = 7.8$  Hz, 3H, *H*-C-CH<sub>3</sub> minor) 0.79 (d,  $J = 6.6$  Hz, 3H, H-C-CH<sub>3</sub> major);  $^{13}\text{C}$  NMR (75 MHz, CDCl<sub>3</sub>)  $\delta$  143.268, 134.139, 134.021, 132.987, 132.878, 131.457, 131.421, 128.061, 128.018, 127.920, 127.543, 127.386, 127.081, 126.968, 126.757, 60.357, 60.322, 35.913, 35.889, 35.833, 35.667, 35.596, 33.700, 32.498, 24.949, 24.833, 19.288, 19.132, 18.975;  $^{31}\text{P}$  NMR ( 162 MHz, CDCl<sub>3</sub>)  $\delta$  41.68 (minor), 40.32 (major). HMRS calculated for C<sub>20</sub>H<sub>28</sub>NNaOP 352.1801, found 352.1774.

Addition of *t*-BuMgBr: **2c-2c'**/**3c-3c'**

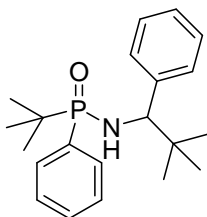

Major/minor = 65 : 35. 90% Yield, pale yellow solid (mp = 198.7-205.7°C).  $^1\text{H}$  -NMR (300 MHz, CDCl<sub>3</sub>)  $\delta$  7.834-6.924 (m, 10H, C-*H* arom. minor + major), 4.068 (t,  $^3J_{PH} = ^3J_{H-C-N-H} = 9.9$  Hz, 1H, C-*H* major), 3.782 (t,  $^3J_{PH} = ^3J_{H-C-N-H} = 11.1$  Hz, 1H, C-*H* minor), 3.221 (brt,  $^2J_{PH} = ^3J_{H-C-N-H} = 10.8$  Hz, 1H, N-*H* minor), 3.063 (brt,  $^2J_{PH} = ^3J_{H-C-N-H} = 9.3$  Hz, 1H, N-*H* major), 1.078 (d,  $^3J_{PH} = 6.6$  Hz, 9H, HC-*t*Bu major), 0.859 (m, 27H, 2 *t*-Bu [major + minor] + HC-*t*Bu minor);  $^{13}\text{C}$  NMR (75 MHz, CDCl<sub>3</sub>)  $\delta$  142.319, 142.293, 142.253, 142.128, 142.102, 134.164, 134.046, 132.607, 132.500, 131.376, 131.343, 131.124, 131.094, 129.714, 129.679, 128.245, 128.092, 127.944, 127.510, 127.487, 127.328, 127.171,

126.703, 126.544, 63.239, 63.200, 62.710, 62.669, 35.677, 35.610, 35.580, 35.544, 34.032, 32.817, 31.491, 31.053, 29.679, 26.940, 24.999, 24.777;  $^{31}\text{P}$  NMR (162 MHz,  $\text{CDCl}_3$ )  $\delta$  41.31 (minor), 40.28 (major). HMRS calculated for  $\text{C}_{21}\text{H}_{31}\text{NOP}$  344.2138, found 344.2141.

Addition of *n*-BuMgBr: **2d-2d'**/**3d-3d'**

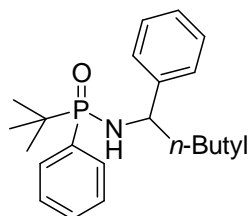

Major/minor = 70: 30. 93% Yield, white solid, (mp = 142.1-146.7 °C).  $^1\text{H}$  -NMR (300 MHz,  $\text{CDCl}_3$ )  $\delta$  7.90-7.08 (m, 10H, C-H arom. minor + major), 4.293 (m, 1H, C-H major), 4.06 (m, 1H, C-H minor), 2.903 (brs, 1H, N-H minor + major), 1.845 (m, 4H, H-C- $\text{CH}_2$ -CH $_2$ - major + minor), 1.239 (m, 2H, -CH $_2$ -CH $_3$  major + minor), 1.124 (d,  $^3J_{\text{PH}} = 15$  Hz, 9H, *t*-Bu minor), 1.046 (d,  $^3J_{\text{PH}} = 15$  Hz, 9H, *t*-Bu major), 0.798 (t,  $J = 7.5$  Hz, 3H, -CH $_3$  minor), 0.75 (t,  $J = 7.2$  Hz, 3H, -CH $_3$  major);  $^{13}\text{C}$  NMR (75 MHz,  $\text{CDCl}_3$ )  $\delta$  144.418, 144.371, 144.264, 144.187, 134.128, 134.011, 133.250, 133.139, 131.850, 131.836, 131.455, 131.421, 131.354, 131.319, 130.308, 128.433, 128.369, 128.016, 127.864, 127.690, 127.534, 126.938, 126.865, 126.594, 126.386, 55.083, 55.046, 54.838, 54.805, 39.791, 39.764, 38.925, 38.862, 33.225, 32.607, 32.035, 31.423, 28.126, 28.075, 24.923, 24.836, 22.463, 22.379, 13.906, 13.810;  $^{31}\text{P}$  NMR (162 MHz,  $\text{CDCl}_3$ )  $\delta$  40.41 (major), 40.07 (minor). HMRS calculated for  $\text{C}_{21}\text{H}_{30}\text{NNaOP}$  366.1957, found 366.1938.

Addition of *n*-Decyl MgBr: **2e-2e'**/**3e-3e'**

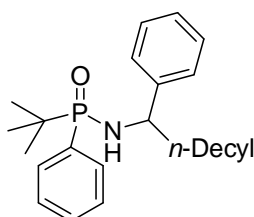

Major/minor = 70 : 30. 91% Yield, white solid, (mp = 237.6-238.9°C).  $^1\text{H}$  -NMR (300 MHz,  $\text{CDCl}_3$ )  $\delta$  7.895-7.075 (m, 10H, C-H arom. minor + major), 4.296 (quintet,  $^2J_{\text{PH}} = ^3J_{\text{H-C-N-H}} = J_{\text{H-C-CH}_2} = 8.1$  Hz, 1H, C-H major), 4.053 (quintet,  $^2J_{\text{PH}} = ^3J_{\text{H-C-N-H}} = J_{\text{H-C-CH}_2} = 9.3$  Hz, 1H, C-H minor), 2.925 (brt,  $^2J_{\text{PH}} = ^3J_{\text{H-C-N-H}} = 9.3$  Hz, 1H, N-H minor), 2.871 (brt,  $^2J_{\text{PH}} = ^3J_{\text{H-C-N-H}} = 8.7$  Hz, 1H, N-H major), 1.820 (m, 2H, HC-CH $_2$ - minor + major), 1.181 (m, 16H, 8 -CH $_2$ - minor + major), 1.113 (d,  $^3J_{\text{PH}} = 14.7$  Hz, 9H, *t*-

Bu minor), 1;035(d,  $^3J_{\text{PH}} = 14.7$  Hz, 9H, *t*-Bu major), 0.859 (t,  $J = 6.6$  Hz, 3H,  $-\text{CH}_3$  major), 0.853(t,  $J = 6.6$  Hz, 3H,  $-\text{CH}_3$  minor);  $^{13}\text{C}$  NMR (75 MHz,  $\text{CDCl}_3$ )  $\delta$  144.429, 144.384, 134.096, 133.979, 133.240, 133.129, 131.826, 131.386, 131.303, 131.275, 130.296, 128.403, 128.334, 127.990, 127.838, 127.659, 127.503, 126.905, 126.832, 126.563, 126.369, 55.079, 55.047, 54.817, 54.785, 40.045, 40.019, 39.185, 39.122, 33.186, 32.587, 31.996, 31.836, 31.402, 29.659, 29.493, 29.446, 29.376, 29.321, 29.279, 29.231, 25.949, 25.918, 24.901, 24.805, 22.620, 14.064;  $^{31}\text{P}$  NMR (162 MHz,  $\text{CDCl}_3$ )  $\delta$  40.28 (minor), 41.8 (major). HMRS calculated for  $\text{C}_{27}\text{H}_{42}\text{NNaOP}$  450.2896, found 450.2849.

#### Addition of Vinyl MgBr: **2f-2f'**/**3f-3f'**

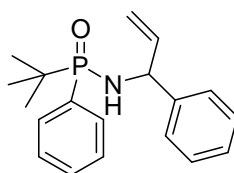

Major/minor = 60 : 40. 67% Yield, white solid, (mp = 116.4-119.8°C).  $^1\text{H}$  -NMR (300 MHz,  $\text{CDCl}_3$ )  $\delta$  7.905-7.161 (m, 10H, C-H arom. minor + major), 6.137 (m, 1H,  $H\text{-C}=\text{CH}_2$  minor), 5.967 (m, 1H,  $H\text{-C}=\text{CH}_2$  major), 5.154 (m, 2H,  $\text{HC}=\text{CH}_2$  major + minor), 4.801 (m, 1H, C-H major + minor), 3.009 (brt,  $^2J_{\text{PH}} = ^3J_{\text{H-C-N-H}} = 9.6$  Hz, 1H, N-H minor), 2.952 (brt,  $^2J_{\text{PH}} = ^3J_{\text{H-C-N-H}} = 9.6$  Hz, 1H, N-H major), 1.156 (d,  $^3J_{\text{PH}} = 15$  Hz, 9H, *t*-Bu minor), 1.115 (d,  $^3J_{\text{PH}} = 15$  Hz, 9H, *t*-Bu major);  $^{13}\text{C}$  NMR (75 MHz,  $\text{CDCl}_3$ )  $\delta$  142.702, 142.666, 142.311, 142.227, 140.780, 140.756, 139.822, 139.745, 133.929, 133.842, 133.729, 131.642, 131.608, 131.548, 131.515, 130.571, 129.006, 128.524, 128.492, 127.955, 127.882, 127.800, 127.727, 127.249, 127.135, 126.958, 115.389, 56.382, 56.357, 33.047, 32.960, 31.859, 31.769, 24.968, 24.904;  $^{31}\text{P}$  NMR (162 MHz,  $\text{CDCl}_3$ )  $\delta$  41.99 (minor), 41.47 (major). HMRS calculated for  $\text{C}_{19}\text{H}_{24}\text{LiNOP}$  320.1750, found 320.1736.

#### Addition of 2-Methylallyl MgBr: **2g-2g'**/**3g-3g'**

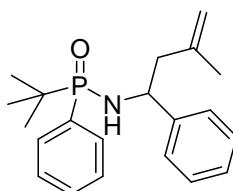

Major/minor = 75 : 25. 85% Yield, white solid, (mp = 129.7-131.2°C).  $^1\text{H}$  -NMR (300 MHz,  $\text{CDCl}_3$ )  $\delta$  7.851-7.132 (m, 10H, C-H arom. minor + major), 4.85 (s, 1H,  $\text{C}=\text{C-H}$  major), 4.796 (s, 1H,  $\text{C}=\text{C-H}$  major), 4.752 (s, 1H,  $\text{C}=\text{C-H}$  minor), 4.668 (s, 1H,  $\text{C}=\text{C-H}$  minor), 4.404 (m, 1H, C-H major + minor),



3.141(brt,  $^2J_{\text{PH}} = ^3J_{\text{H-C-N-H}} = 7.2$  Hz, 1H, N-*H* major), 3.026 (brt,  $^2J_{\text{PH}} = ^3J_{\text{H-C-N-H}} = 9.6$  Hz, 1H, N-*H* minor), 2.605 (m, 2H, -*CH*<sub>2</sub>- major), 2.457 (m, 2H, -*CH*<sub>2</sub>- minor), 1.62 (s, 3H, -*CH*<sub>3</sub> major) 1.51 (s, 3H, -*CH*<sub>3</sub> minor), 1.118 (d,  $^3J_{\text{PH}} = 14.7$  Hz, 9H, *t*-Bu major), 1.061(d,  $^3J_{\text{PH}} = 14.7$  Hz, 9H, *t*-Bu minor); <sup>13</sup>C NMR (75 MHz, CDCl<sub>3</sub>)  $\delta$  144.150, 144.133, 143.781, 143.721, 142.597, 142.435, 133.959, 133.843, 133.198, 133.085, 131.428, 131.393, 131.145, 131.112, 129.910, 128.247, 128.099, 127.973, 127.821, 127.487, 127.330, 126.917, 126.826, 126.608, 126.541, 114.510, 114.181, 52.648, 52.616, 51.857, 51.825, 48.239, 48.160, 48.109, 48.061, 33.291, 32.867, 32.093, 31.695, 24.846, 24.766, 22.365, 22.266; <sup>31</sup>P NMR ( 162 MHz, CDCl<sub>3</sub>)  $\delta$  41.74 (major), 40.03 (minor). HMRS calculated for C<sub>21</sub>H<sub>28</sub>LiNOP 348.2064, found 348.2030.

Addition of *p*-Anisyl MgBr: **2h-2h'**/**3h-3h'**

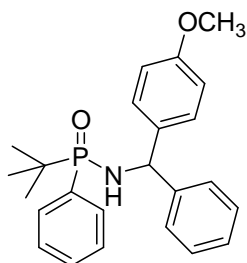

Major/minor = 60 : 40. 97% Yield, pale yellow viscous oil. <sup>1</sup>H -NMR (300 MHz, CDCl<sub>3</sub>)  $\delta$  7.694-6.783 (m, 14H, C-*H* arom. minor + major), 5.427 (t,  $^3J_{\text{PH}} = ^3J_{\text{H-C-N-H}} = 9.9$  Hz, 1H, C-*H* major), 5.404 (t,  $^3J_{\text{PH}} = ^3J_{\text{H-C-N-H}} = 9.9$  Hz, 1H, C-*H* minor), 3.786 (s, 3H, -*OCH*<sub>3</sub> major), 3.767(s, 3H, -*OCH*<sub>3</sub> minor), 3.266 (brt,  $^2J_{\text{PH}} = ^3J_{\text{H-C-N-H}} = 9$  Hz, 1H, N-*H* minor + major), 1.134 (d,  $^3J_{\text{PH}} = 15$  Hz, 9H, *t*-Bu minor + major); <sup>13</sup>C NMR (75 MHz, CDCl<sub>3</sub>)  $\delta$  158.569, 144.217, 144.199, 133.910, 133.856, 133.753, 131.503, 128.968, 128.712, 128.385, 128.310, 127.825, 127.716, 127.639, 127.460, 127.007, 126.946, 113.760, 113.683, 57.026, 55.234, 32.954, 31.826, 24.939; <sup>31</sup>P NMR ( 162 MHz, CDCl<sub>3</sub>)  $\delta$  42.35(minor), 42.18 (major). HMRS calculated for C<sub>24</sub>H<sub>28</sub>NNaOP 416.1750, found 416.1798.

Addition of *o*-Anisyl MgBr: **2i-2i'**/**3i-3i'**

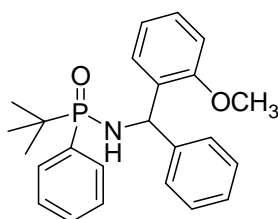

Major/minor = 60 : 40. 97% Yield, white solid, (mp = 148.2-156.3°C). <sup>1</sup>H -NMR (300 MHz, CDCl<sub>3</sub>)  $\delta$  7.813-6.869 (m, 14H, C-*H* arom. minor + major), 5.507 (t,  $^3J_{\text{PH}} = ^3J_{\text{H-C-N-H}} = 10.2$  Hz, 1H, C-*H* minor),

5.436 (t,  $^3J_{\text{PH}} = ^3J_{\text{H-C-N-H}} = 10.8$  Hz, 1H, C-H major), 4.23 (m, 1H, -NH minor + major), 3.714 (s, 3H, -OCH<sub>3</sub> minor), 3.631 (s, 3H, -OCH<sub>3</sub> major), 1.159 (d,  $J = 14.7$  Hz, 9H, *t*-Bu major), 1.104 (d,  $^3J_{\text{PH}} = 15$  Hz, 9H, *t*-Bu minor); <sup>13</sup>C NMR (75 MHz, CDCl<sub>3</sub>)  $\delta$  157.085, 156.660, 134.123, 134.006, 133.556, 133.443, 131.862, 131.507, 131.283, 129.379, 128.956, 128.505, 128.453, 127.995, 127.928, 127.846, 127.650, 127.495, 127.046, 126.750, 126.463, 120.991, 120.783, 111.602, 111.508, 56.056, 56.030, 55.471, 55.444, 55.417, 55.372, 33.298, 32.722, 32.572, 32.104, 31.527, 24.962, 24.891; <sup>31</sup>P NMR (162 MHz, CDCl<sub>3</sub>)  $\delta$  41.65(minor), 41.47 (major). HMRS calculated for C<sub>24</sub>H<sub>28</sub>NNaOP 416.1750, found 416.1747.

Addition of *o*-Tolyl MgBr: **2j-2j'**/**3j-3j'**

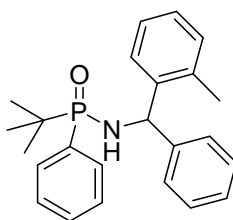

Major/minor = 55 : 45. 95% Yield, white solid, (mp = 161.7-165.3°C). <sup>1</sup>H -NMR (300 MHz, CDCl<sub>3</sub>)  $\delta$  7.796-7.023 (m, 14H, C-H arom. minor + major), 5.728 (t,  $^3J_{\text{PH}} = ^3J_{\text{H-C-N-H}} = 9.3$  Hz, 1H, C-H minor), 5.516 (t,  $^3J_{\text{PH}} = ^3J_{\text{H-C-N-H}} = 9.6$  Hz, 1H, C-H major), 3.361 (t,  $^2J_{\text{PH}} = ^3J_{\text{H-C-N-H}} = 9.3$ , 1H, -NH minor), 3.199 (t,  $^2J_{\text{PH}} = ^3J_{\text{H-C-N-H}} = 9.3$  Hz, 1H, -NH major), 2.157 (s, 3H, -CH<sub>3</sub> minor), 1.789 (s, 3H, -CH<sub>3</sub> major), 1.163 (d,  $^3J_{\text{PH}} = 14.7$  Hz, 9H, *t*-Bu major), 1.092 (d,  $^3J_{\text{PH}} = 15$  Hz, 9H, *t*-Bu minor); <sup>13</sup>C NMR (75 MHz, CDCl<sub>3</sub>)  $\delta$  143.428, 143.395, 143.315, 141.514, 141.471, 141.362, 135.447, 134.053, 133.936, 133.203, 133.091, 131.561, 131.526, 130.694, 130.352, 128.427, 128.401, 128.002, 127.932, 127.849, 127.771, 127.607, 127.106, 127.041, 127.004, 126.868, 126.501, 126.212, 126.066, 54.714, 54.688, 54.223, 54.194, 33.679, 32.752, 32.473, 31.560, 25.010, 24.872, 19.490, 19.100; <sup>31</sup>P NMR (162 MHz, CDCl<sub>3</sub>)  $\delta$  43.00(minor), 41.33 (major). HMRS calculated for C<sub>24</sub>H<sub>28</sub>NNaOP 400.1801, found 400.1837.

Addition of 2-Mesityl MgBr: **2k-2k'**

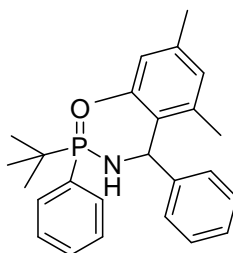

Major/minor = 100 : 0. 98% Yield, pale yellow viscous oil. <sup>1</sup>H -NMR (300 MHz, CDCl<sub>3</sub>)  $\delta$  7.867-7.109

(m, 10H, C-H arom), 6.748 (s, 2H, C-H arom), 5.823 (t,  $^3J_{\text{PH}} = ^3J_{\text{H-C-N-H}} = 9.9$  Hz, 1H, -CH), 3.361 (m, 1H, -NH), 2.183 (s, 3H, -CH<sub>3</sub>), 2.074 (s, 6H, 2-CH<sub>3</sub>), 1.04(d,  $^3J_{\text{PH}} = 15$  Hz, 9H, *t*-Bu); <sup>13</sup>C NMR (75 MHz, CDCl<sub>3</sub>)  $\delta$  143.555, 143.455, 137.325, 136.497, 135.766, 133.119, 133.010, 131.612, 131.579, 130.733, 130.163, 129.204, 128.232, 128.093, 126.400, 126.144, 52.820, 52.793, 33.632, 32.433, 24.797, 20.850, 20.666; <sup>31</sup>P NMR ( 162 MHz, CDCl<sub>3</sub>)  $\delta$  41.35. HMRS calculated for C<sub>26</sub>H<sub>32</sub>LiNOP 412.2377, found 412.2339.

Addition of 2,6-dimethylphenyl MgBr: **2l-2l'**/**3l-3l'**

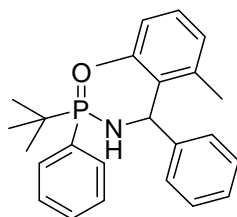

Major/minor = 85 : 15. 99% Yield, pale yellow viscous oil. <sup>1</sup>H -NMR (300 MHz, CDCl<sub>3</sub>)  $\delta$  7.942-6.997 (m, 13H, C-H arom), 5.963 (t,  $^3J_{\text{PH}} = ^3J_{\text{H-C-N-H}} = 10.8$  Hz, 1H, C-H major), 5.963 (t,  $^3J_{\text{PH}} = ^3J_{\text{H-C-N-H}} = 11.1$  Hz, 1H, C-H minor) 3.625 (t,  $^2J_{\text{PH}} = ^3J_{\text{H-C-N-H}} = 10.8$  Hz, 1H, -NH minor), 3.498 (t,  $^2J_{\text{PH}} = ^3J_{\text{H-C-N-H}} = 10.8$  Hz, 1H, -NH major), 2.2 (s, 6H, 2-CH<sub>3</sub> major), 2.2 (s, 6H, 2-CH<sub>3</sub> minor), 1.206 (d,  $^3J_{\text{PH}} = 14.7$  Hz, 9H, *t*-Bu major), 1.078(d,  $^3J_{\text{PH}} = 15$  Hz, 9H, *t*-Bu minor); <sup>13</sup>C NMR (75 MHz, CDCl<sub>3</sub>)  $\delta$  143.252, 143.154, 140.209, 135.987, 134.247, 134.128, 133.062, 132.953, 131.691, 131.657, 130.678, 129.404, 129.363, 129.155, 128.376, 128.297, 128.151, 127.702, 127.540, 127.243, 127.090, 126.772, 126.517, 126.145, 53.016, 52.990, 33.678, 32.479, 25.130, 24.745, 20.846, 20.778; <sup>31</sup>P NMR ( 162 MHz, CDCl<sub>3</sub>)  $\delta$  42.75 (minor), 41;64 (major). HMRS calculated for C<sub>25</sub>H<sub>31</sub>NOP 392.2138, found 392.2154.

**$^1\text{H}$ -,  $^{13}\text{C}$ - and  $^{31}\text{P}$ -NMR Spectra**

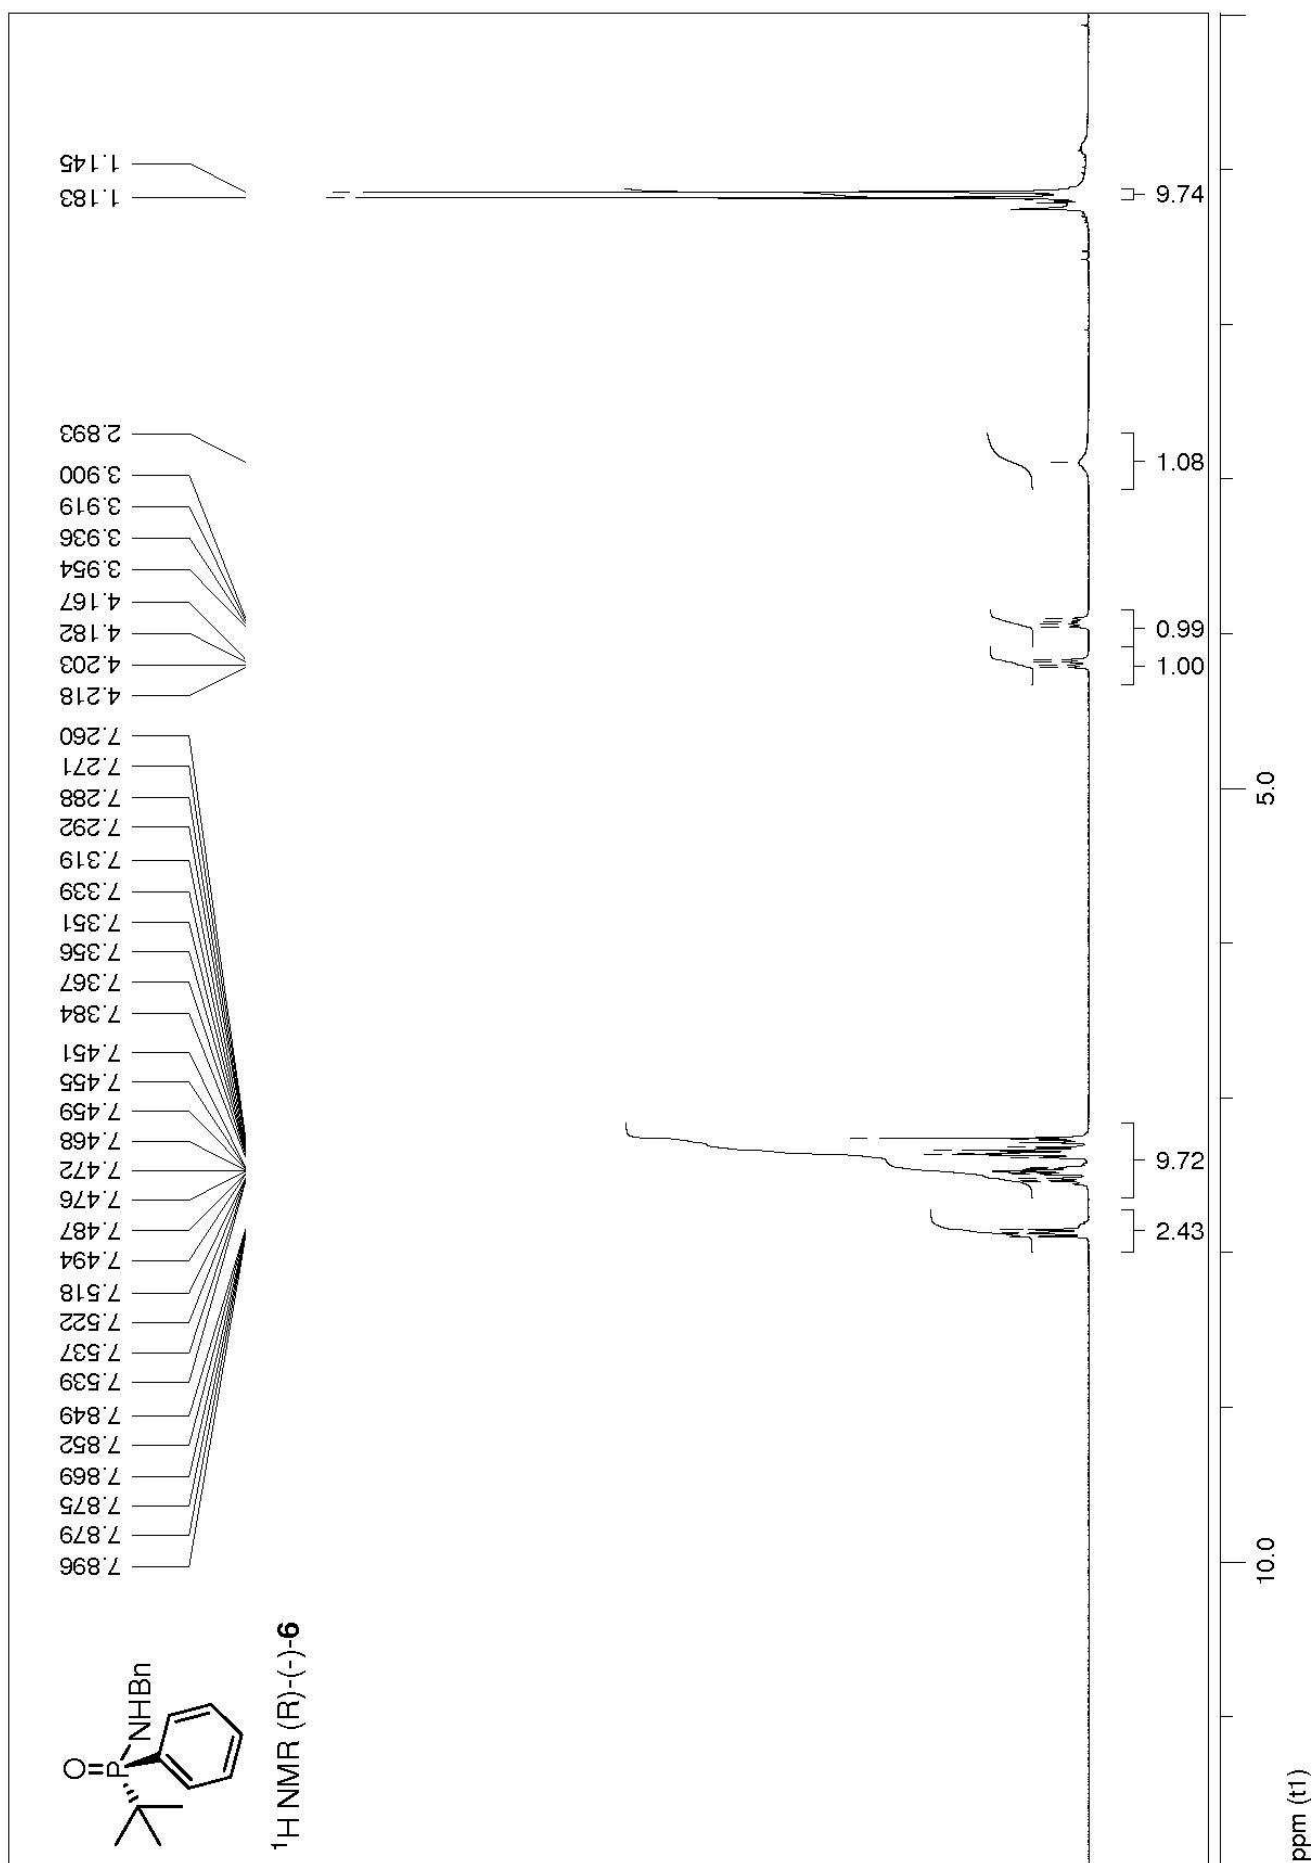

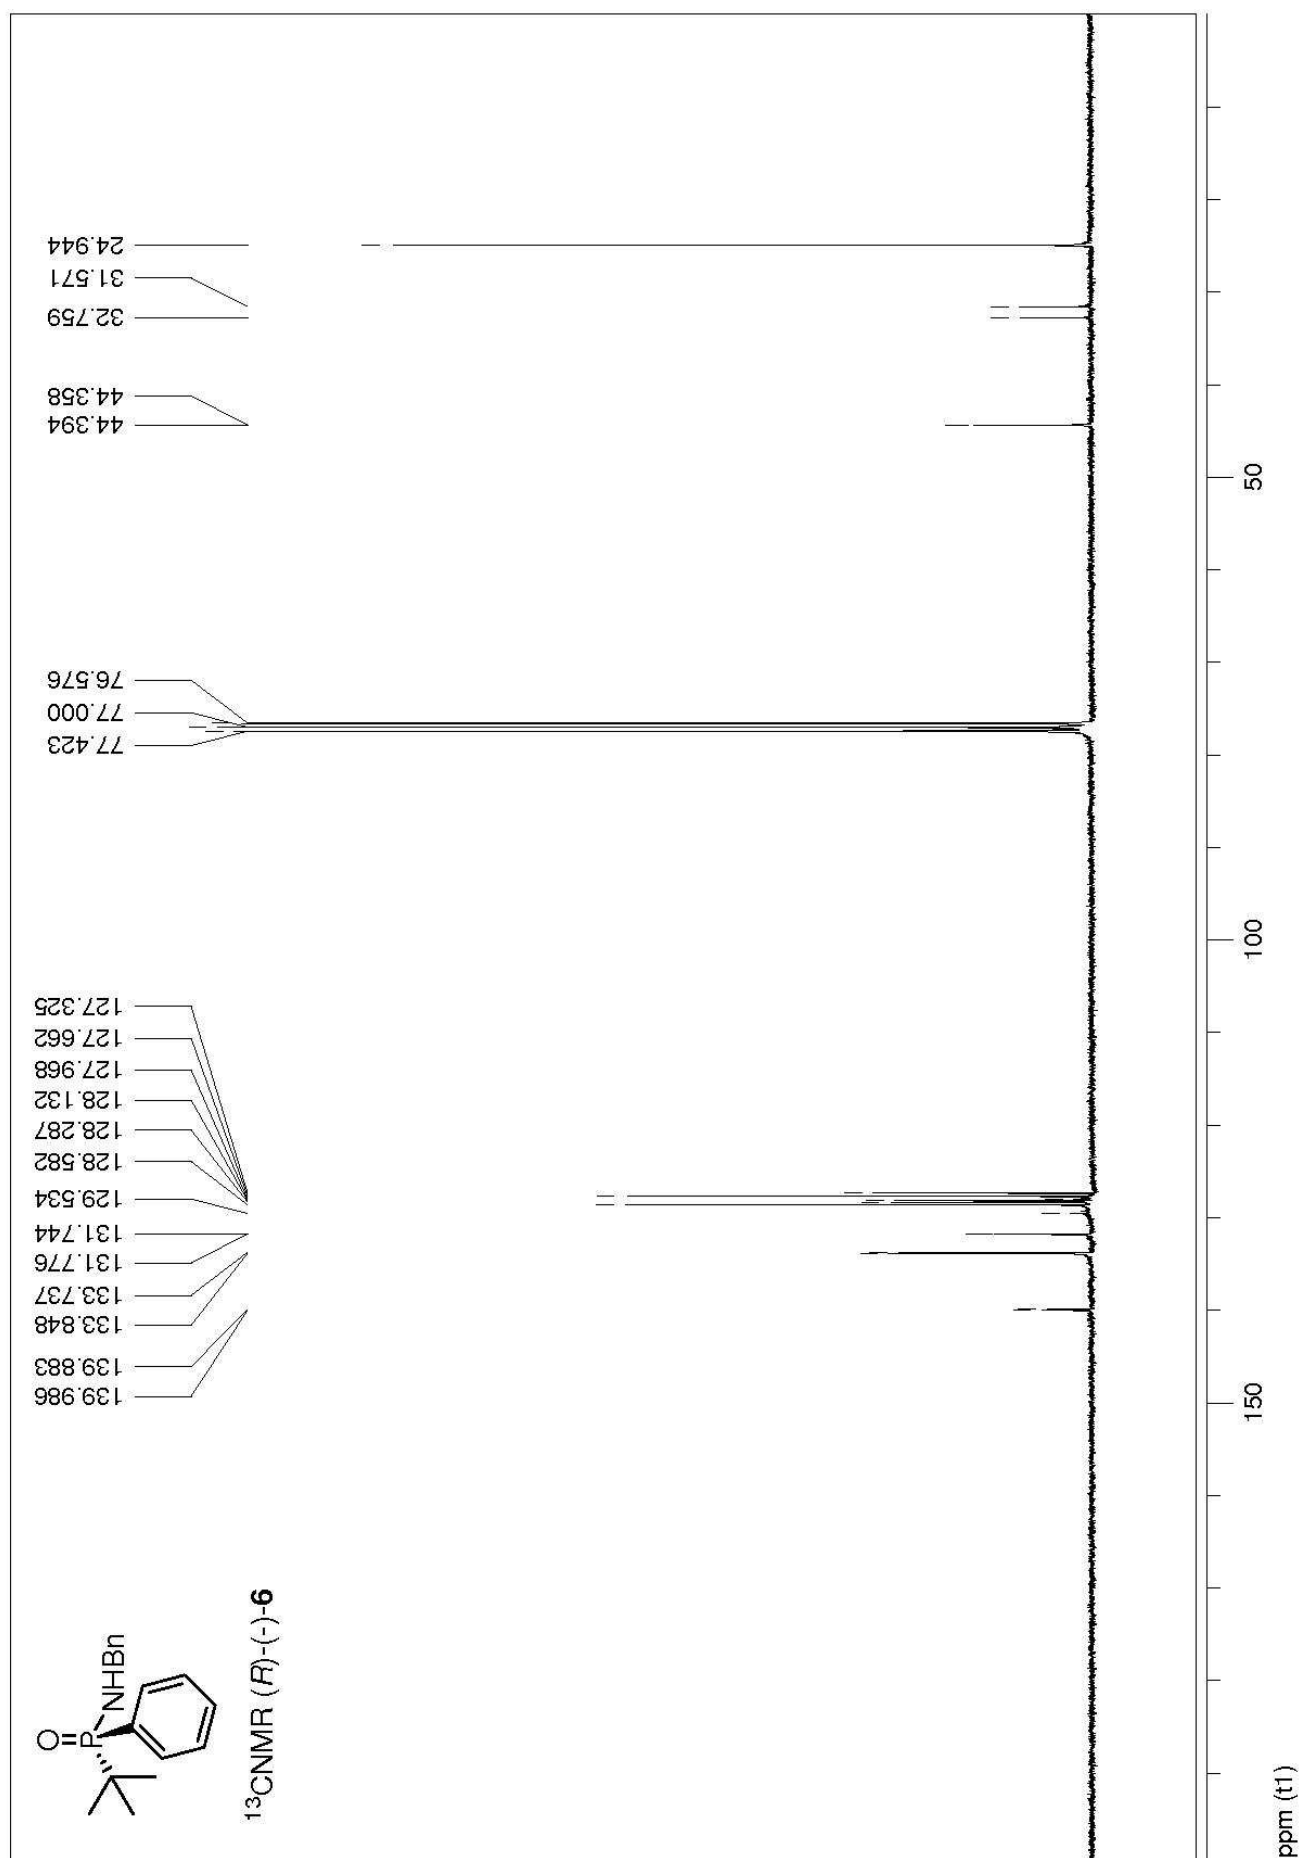

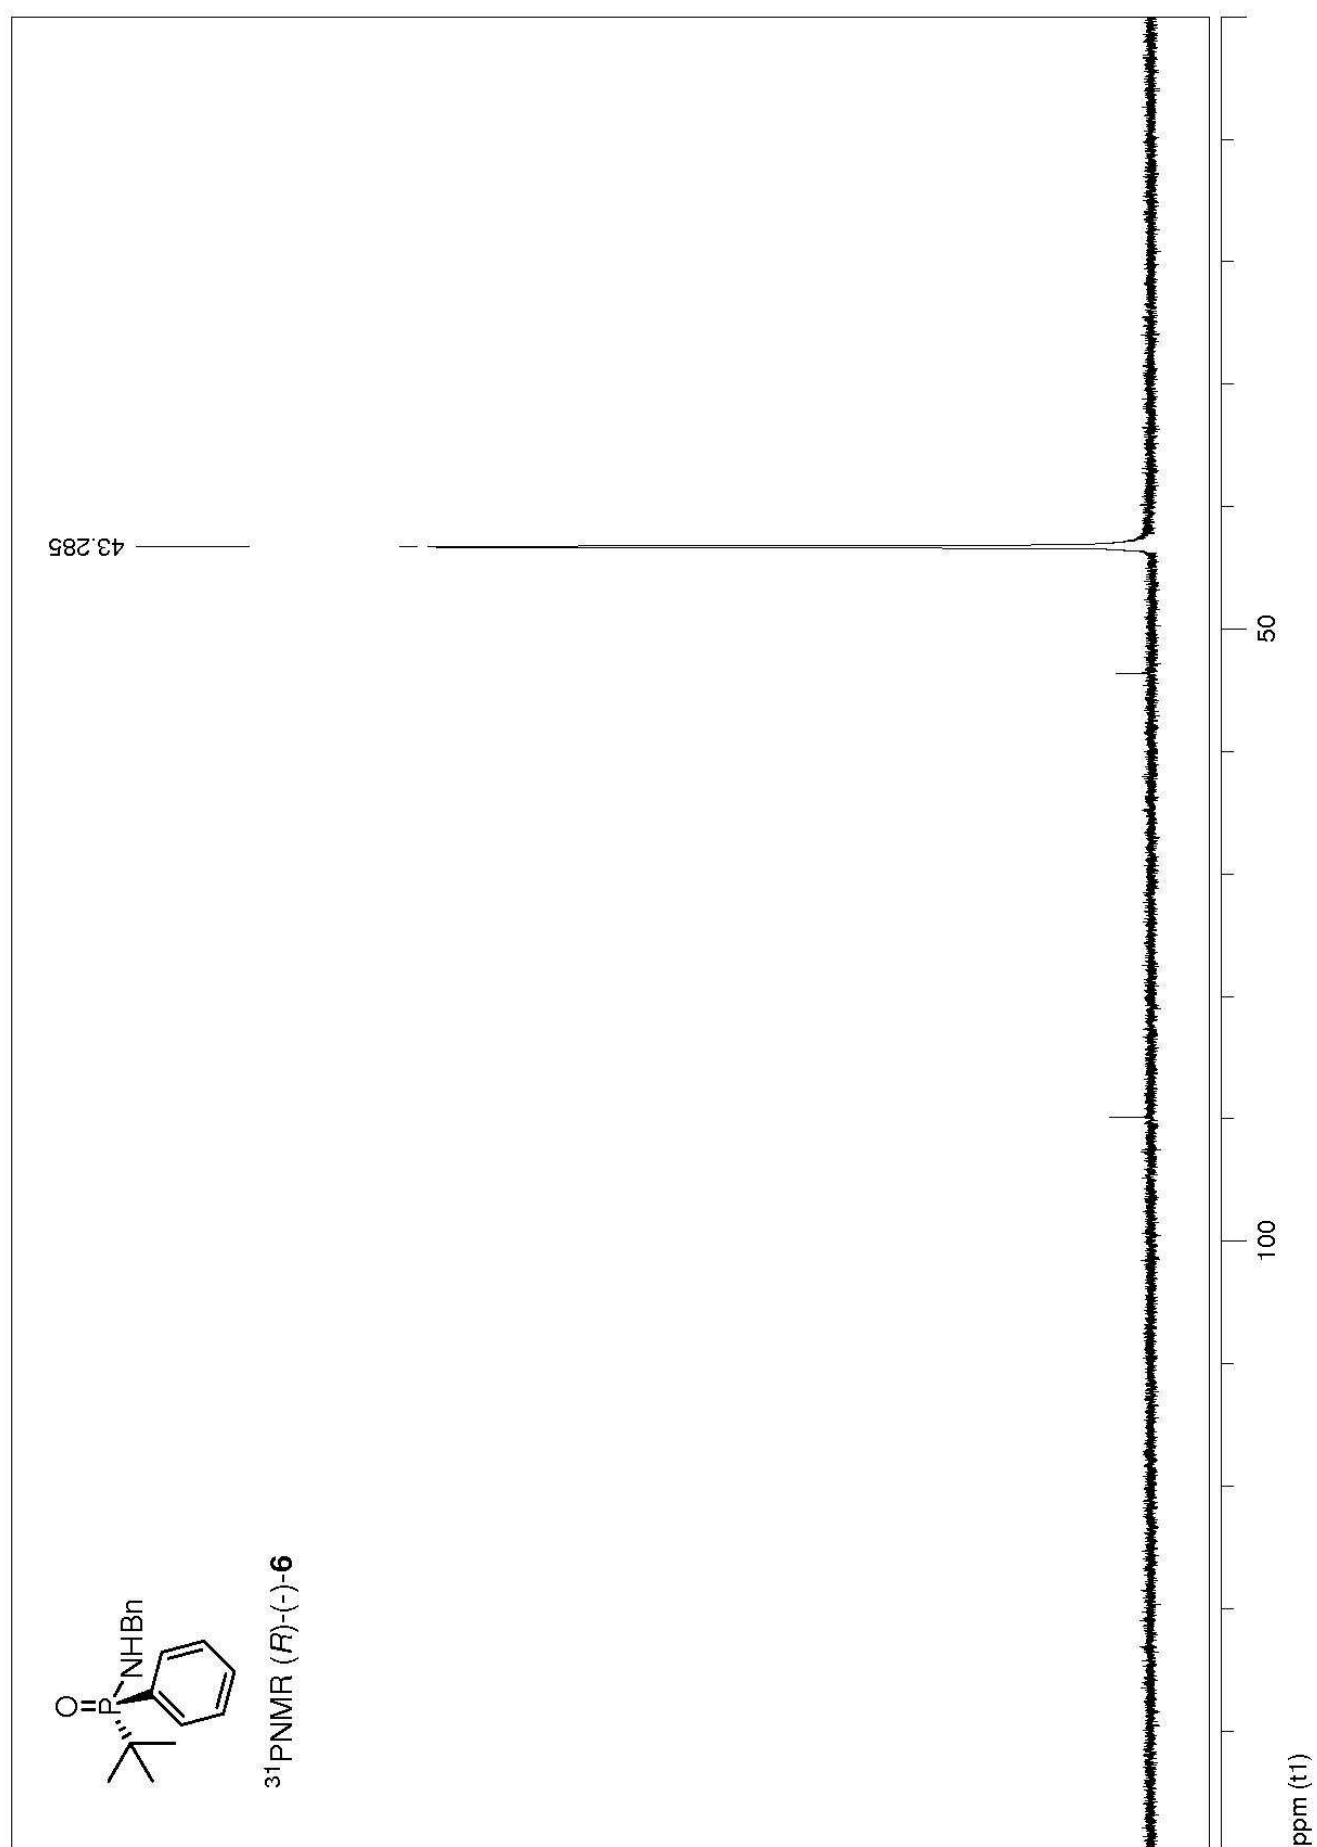

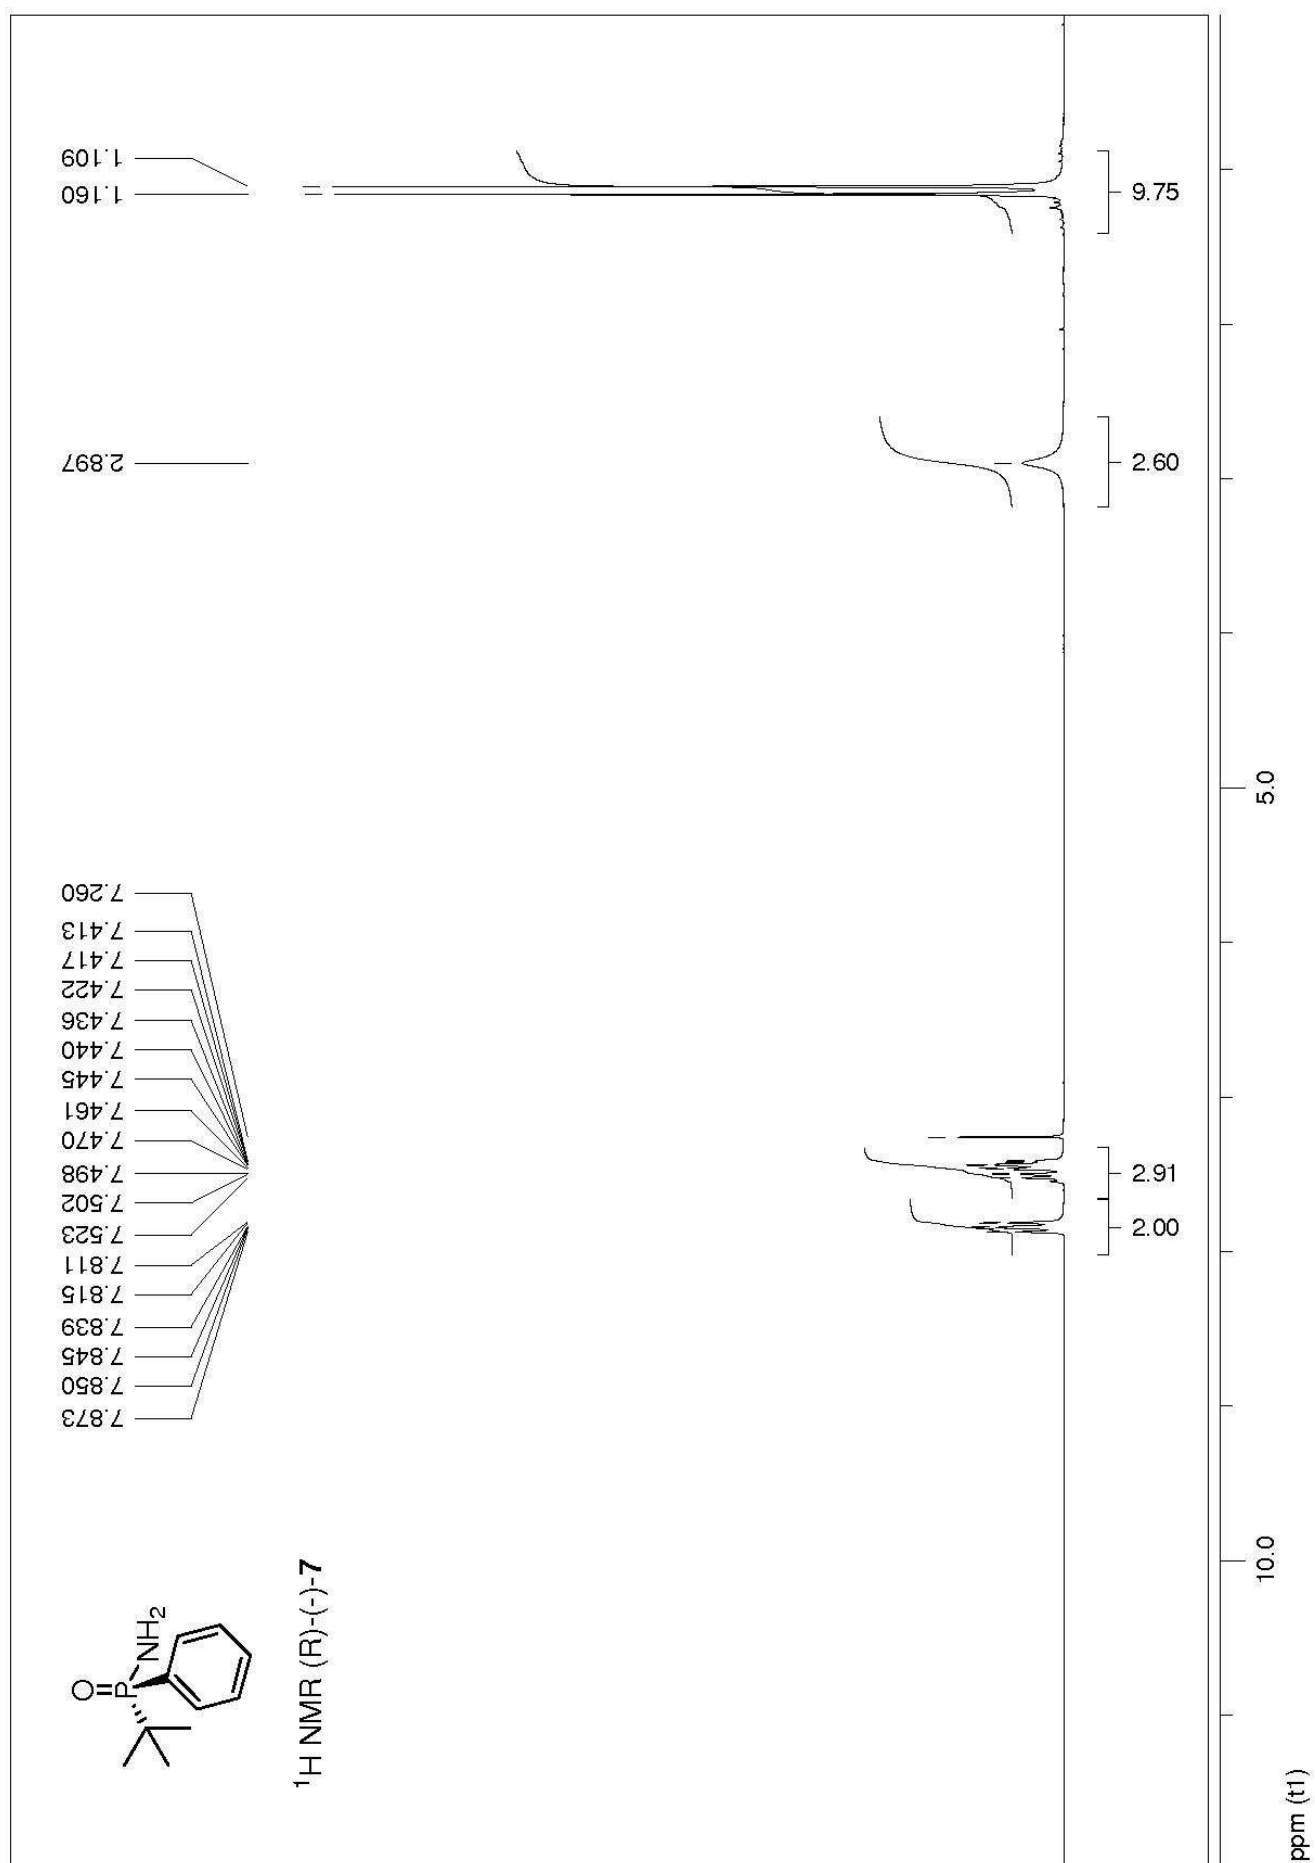



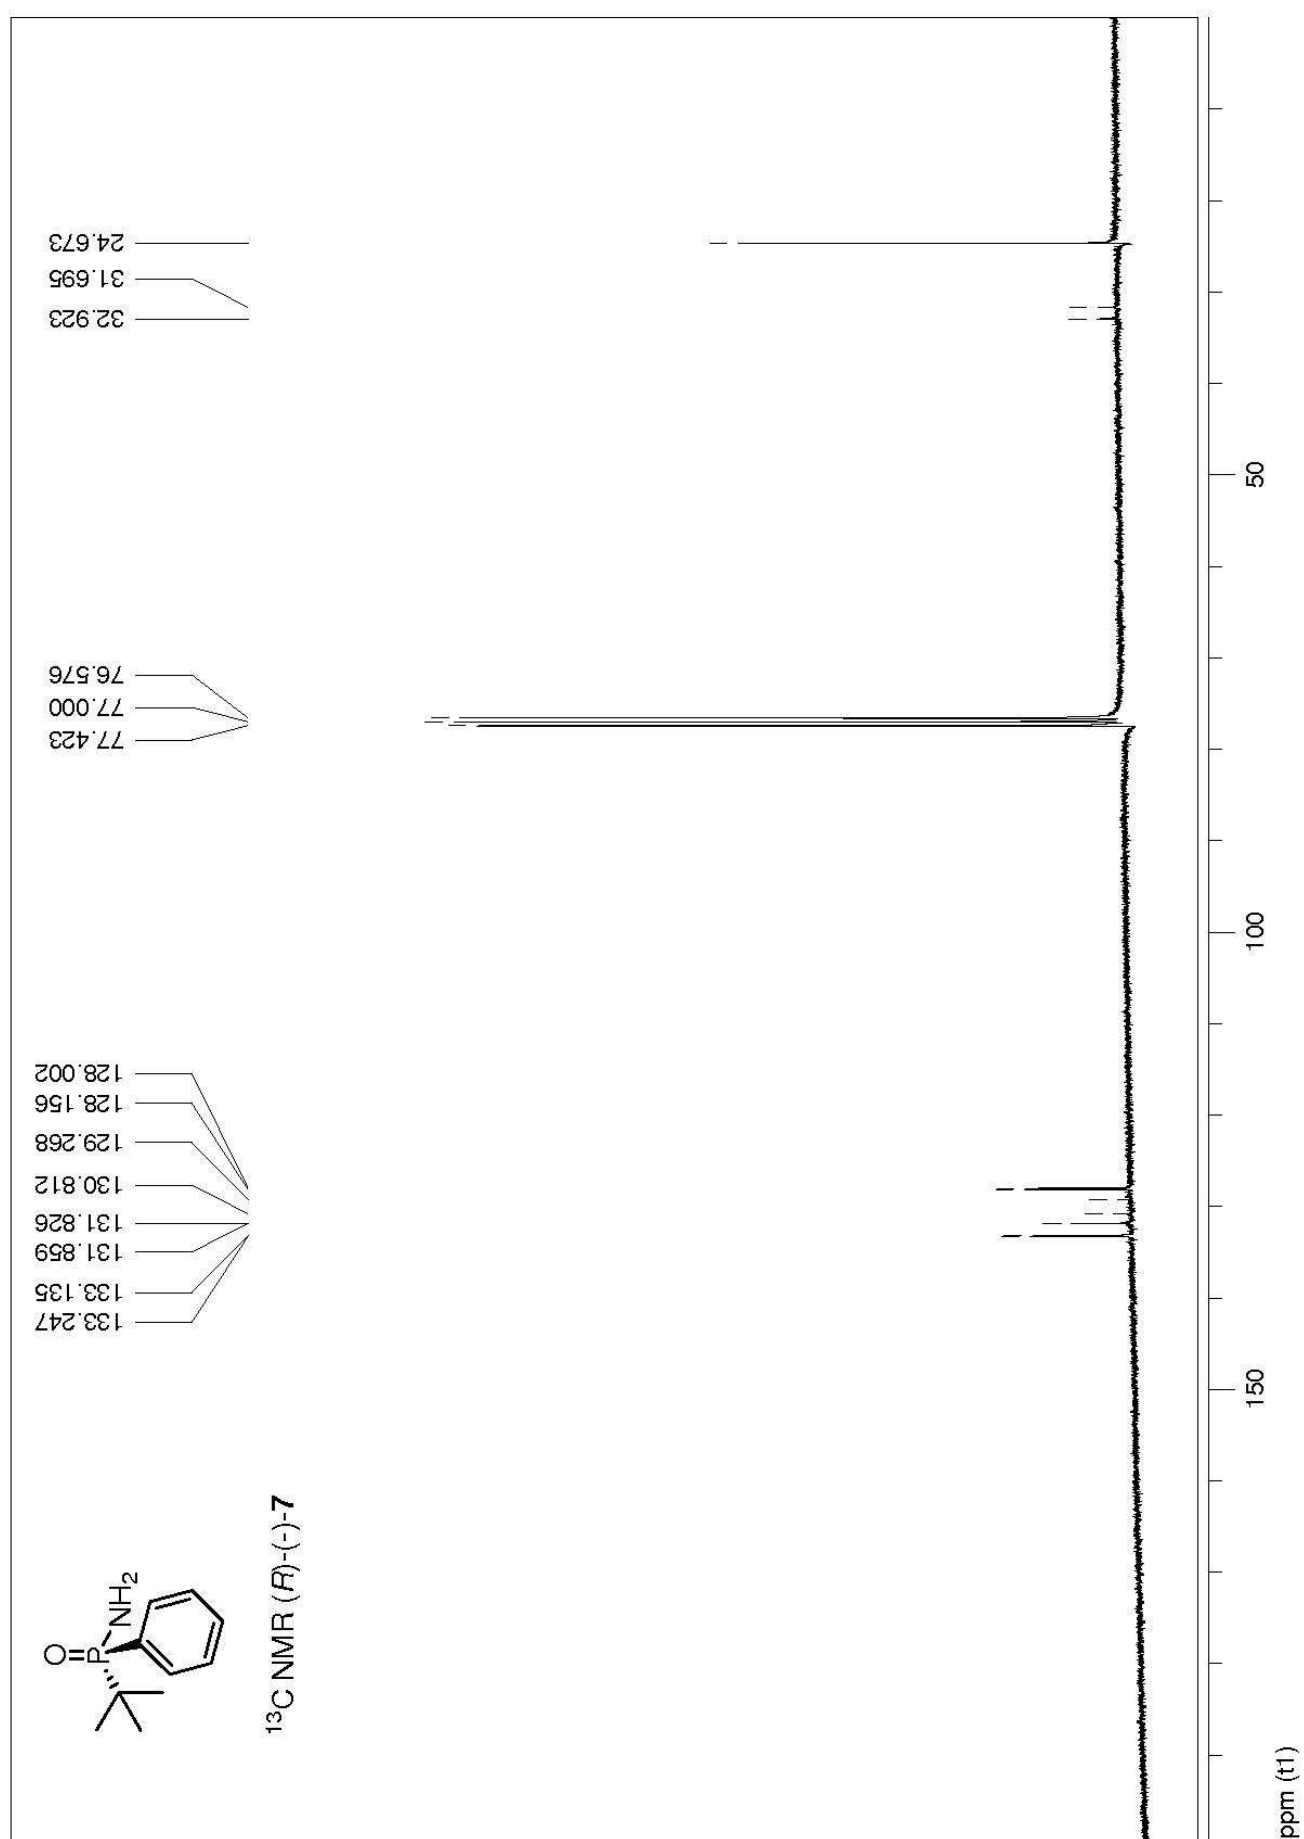

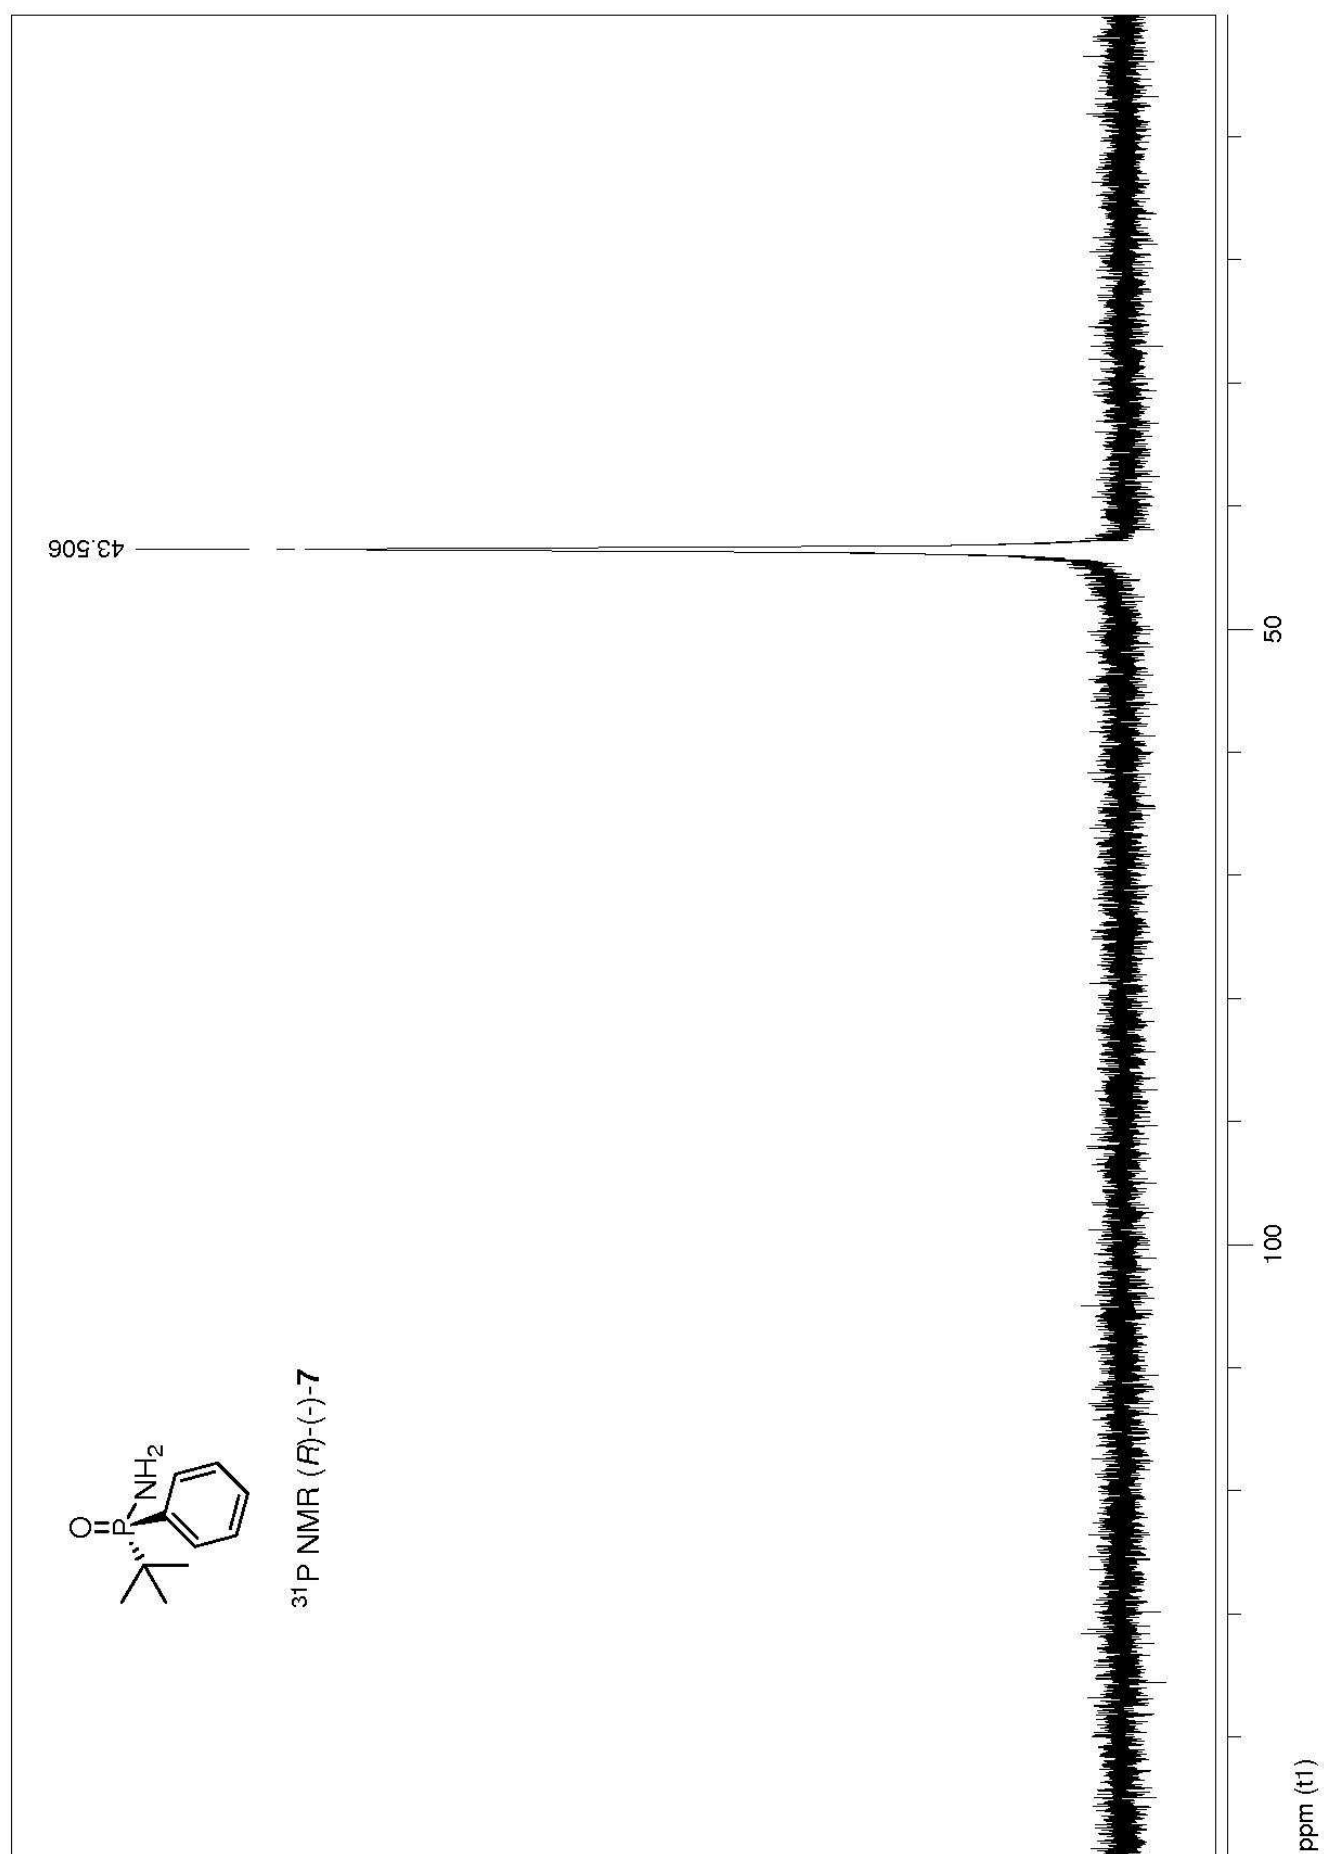

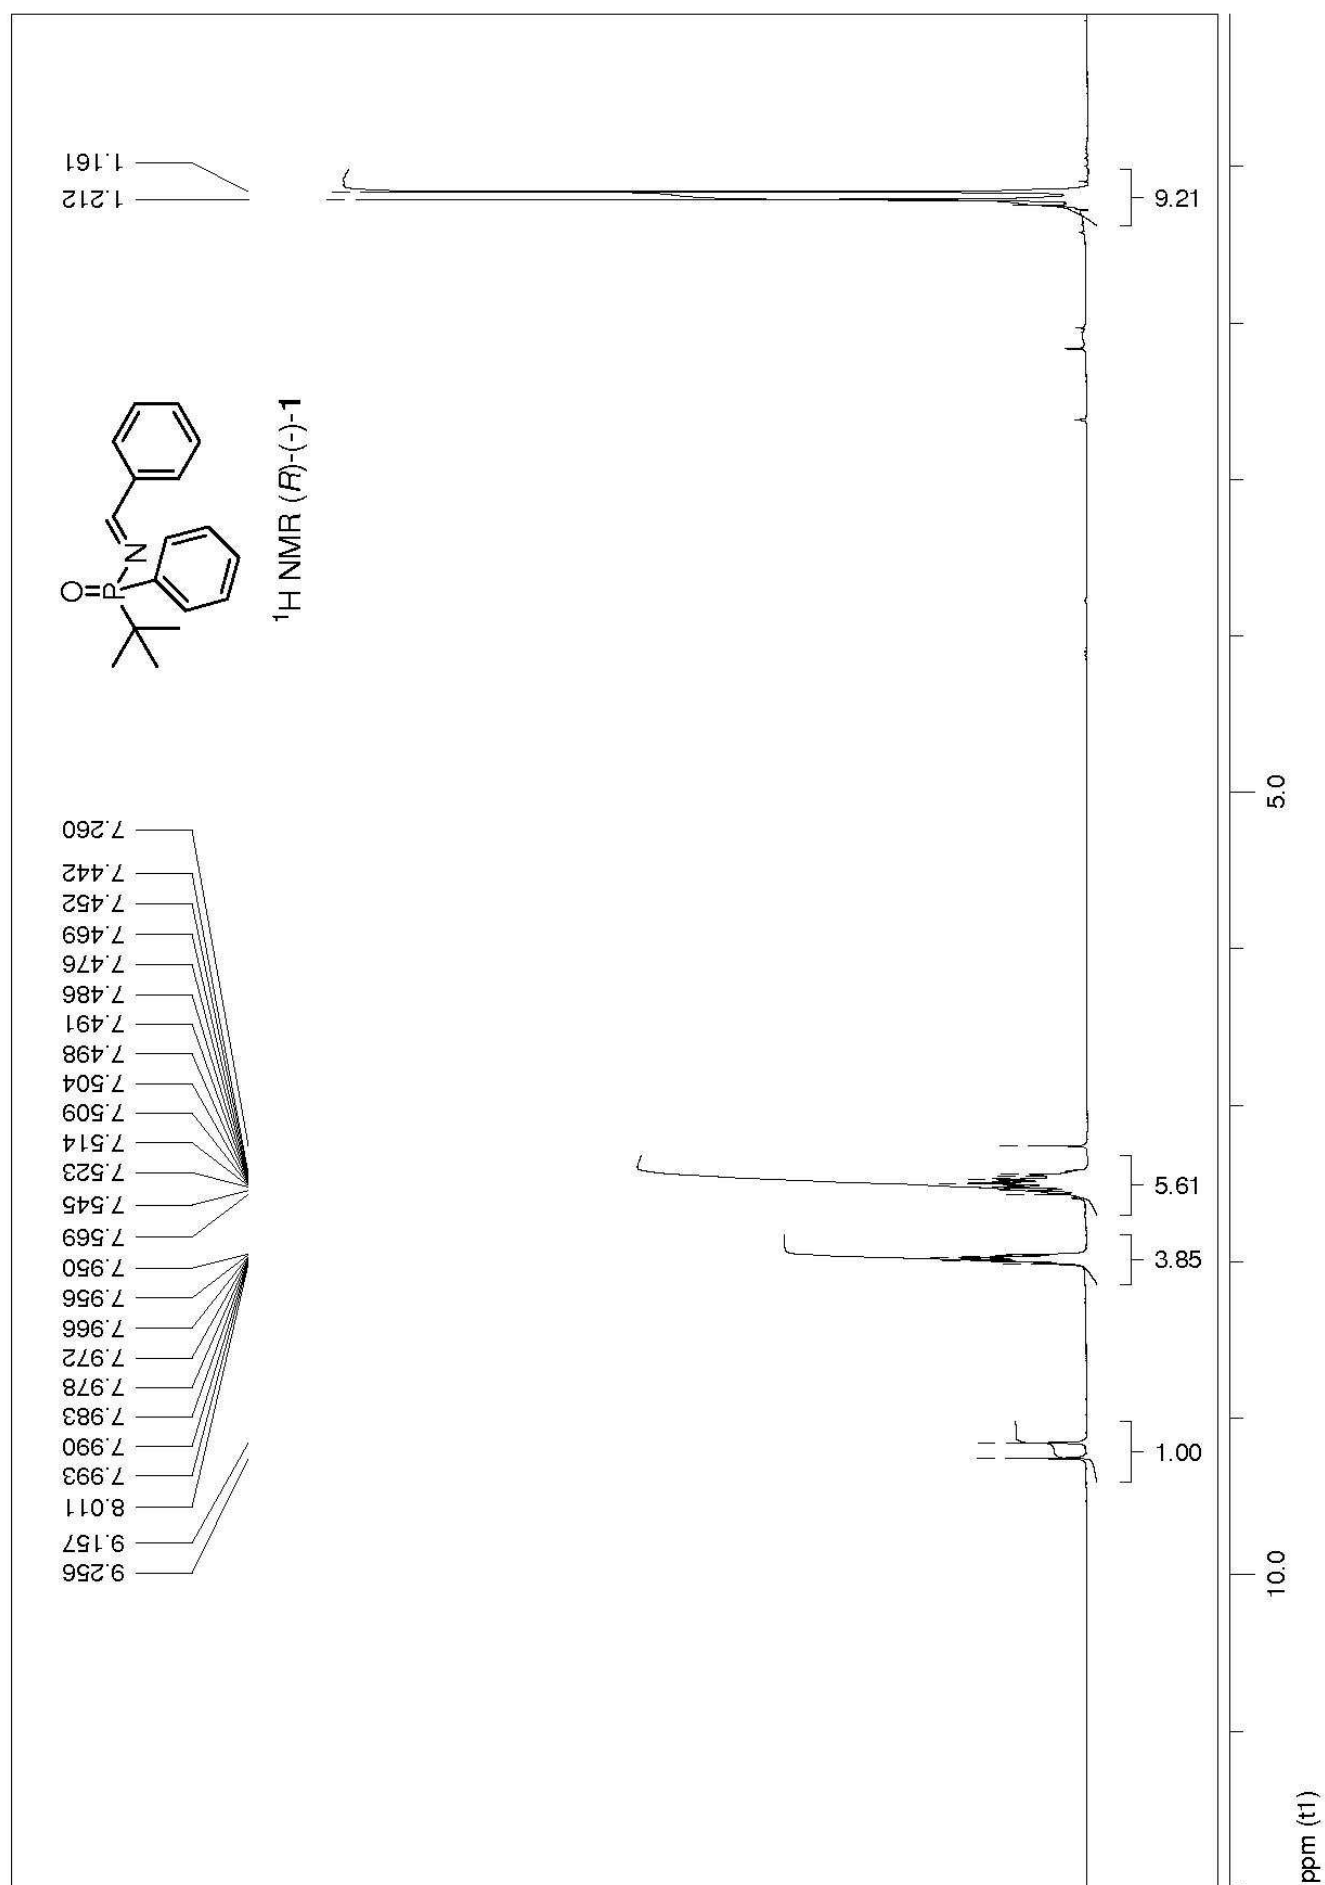

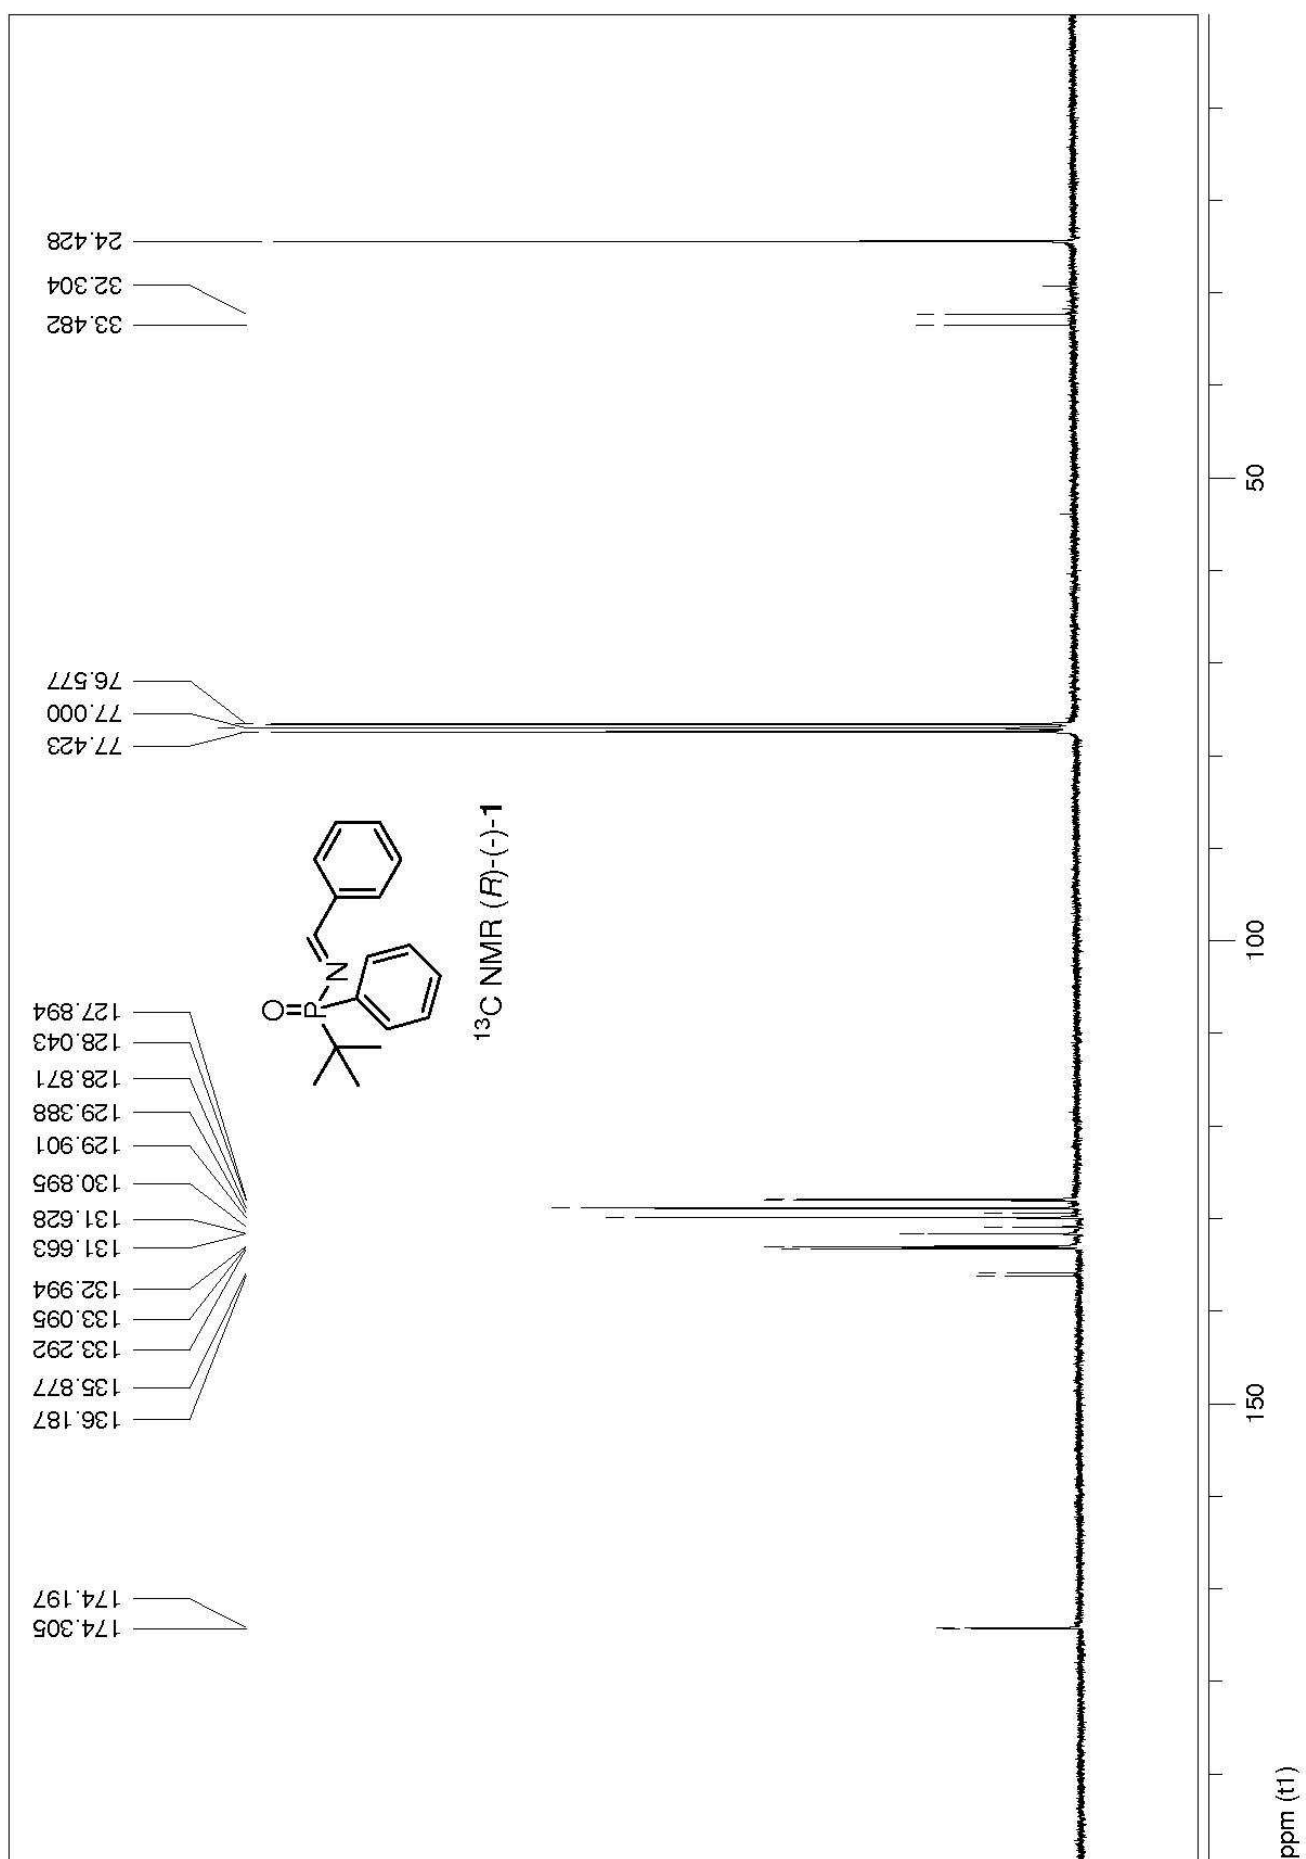

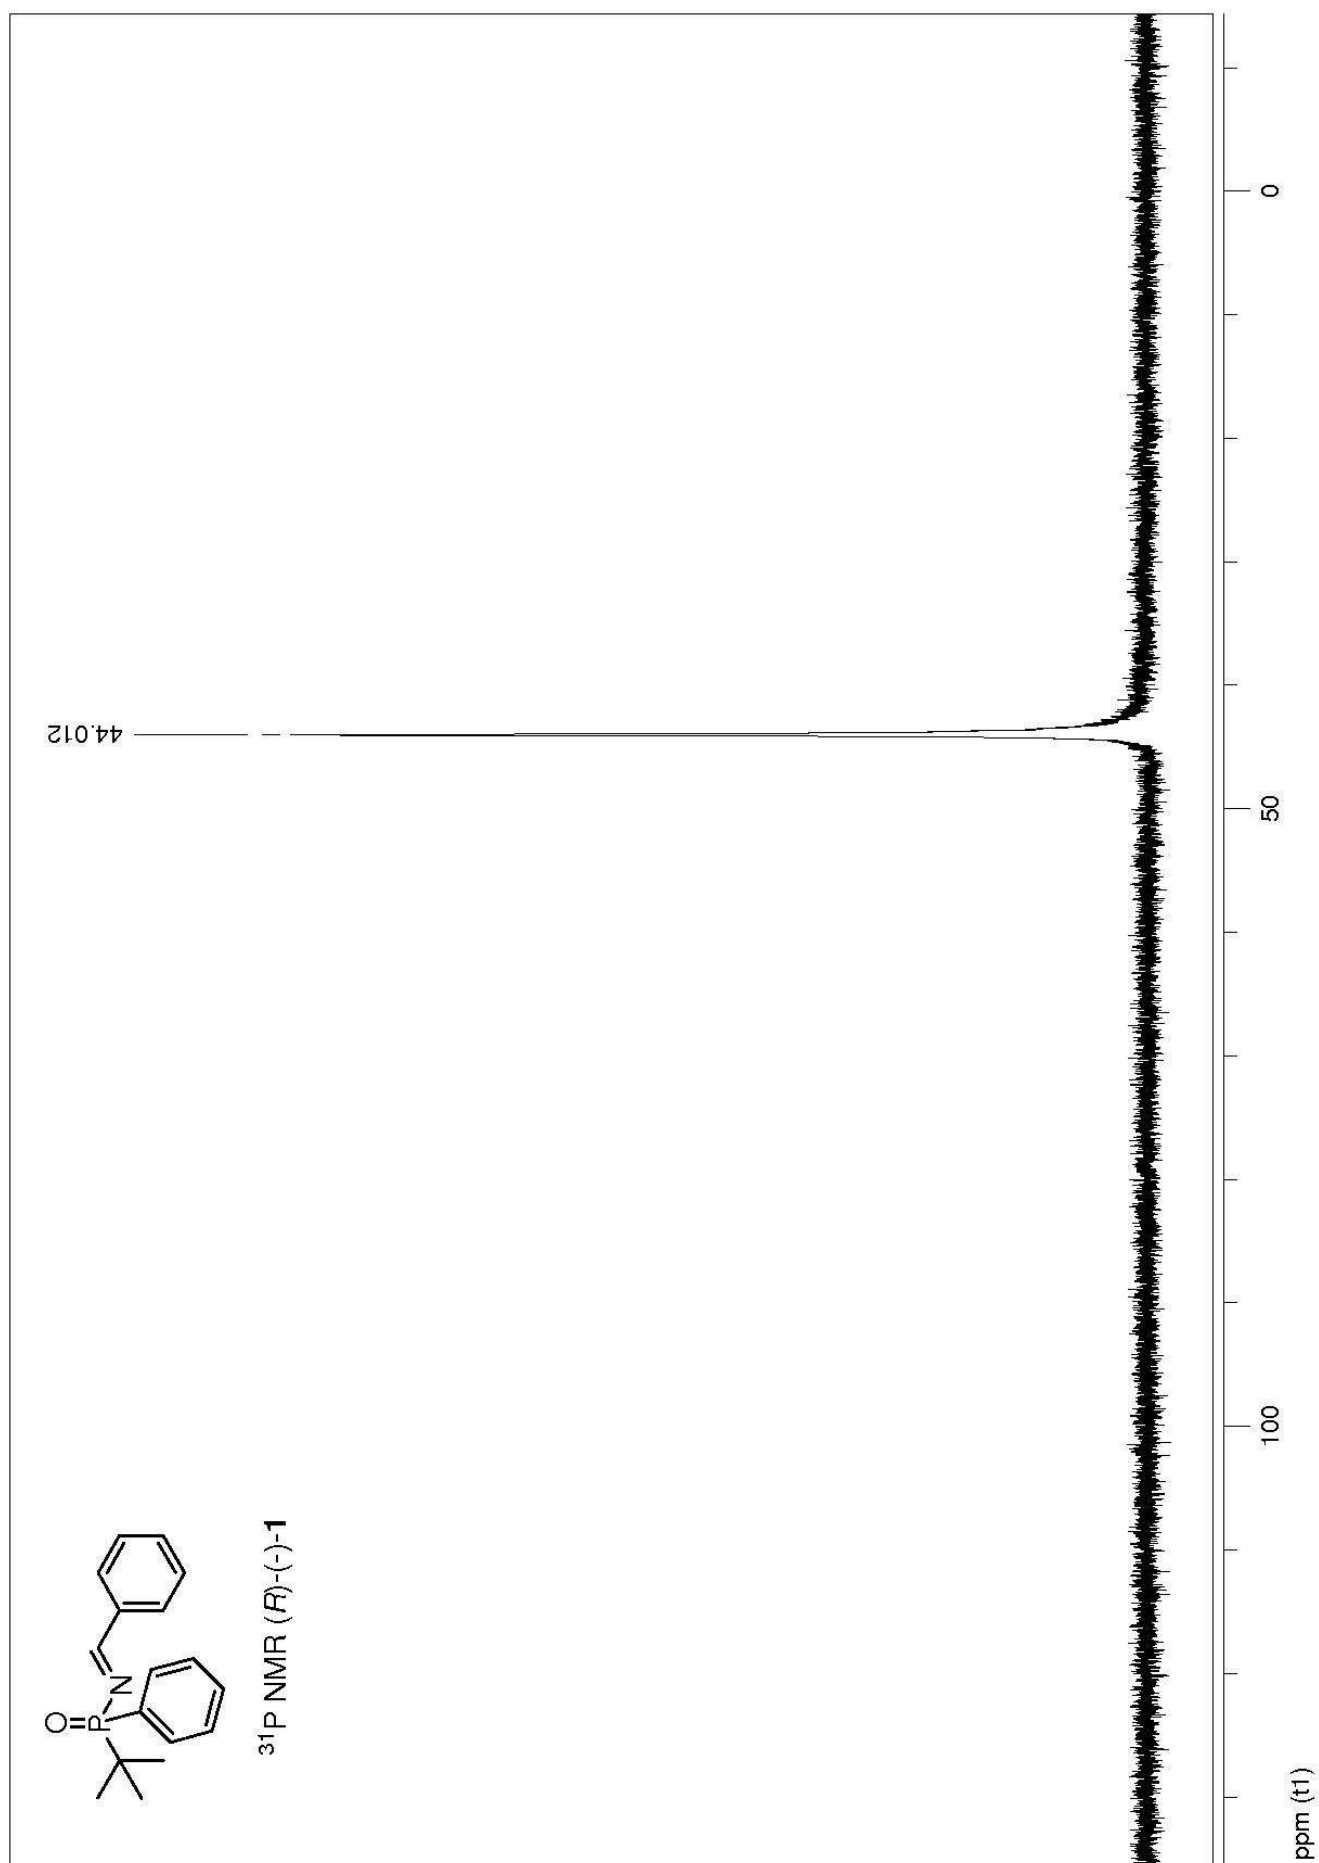

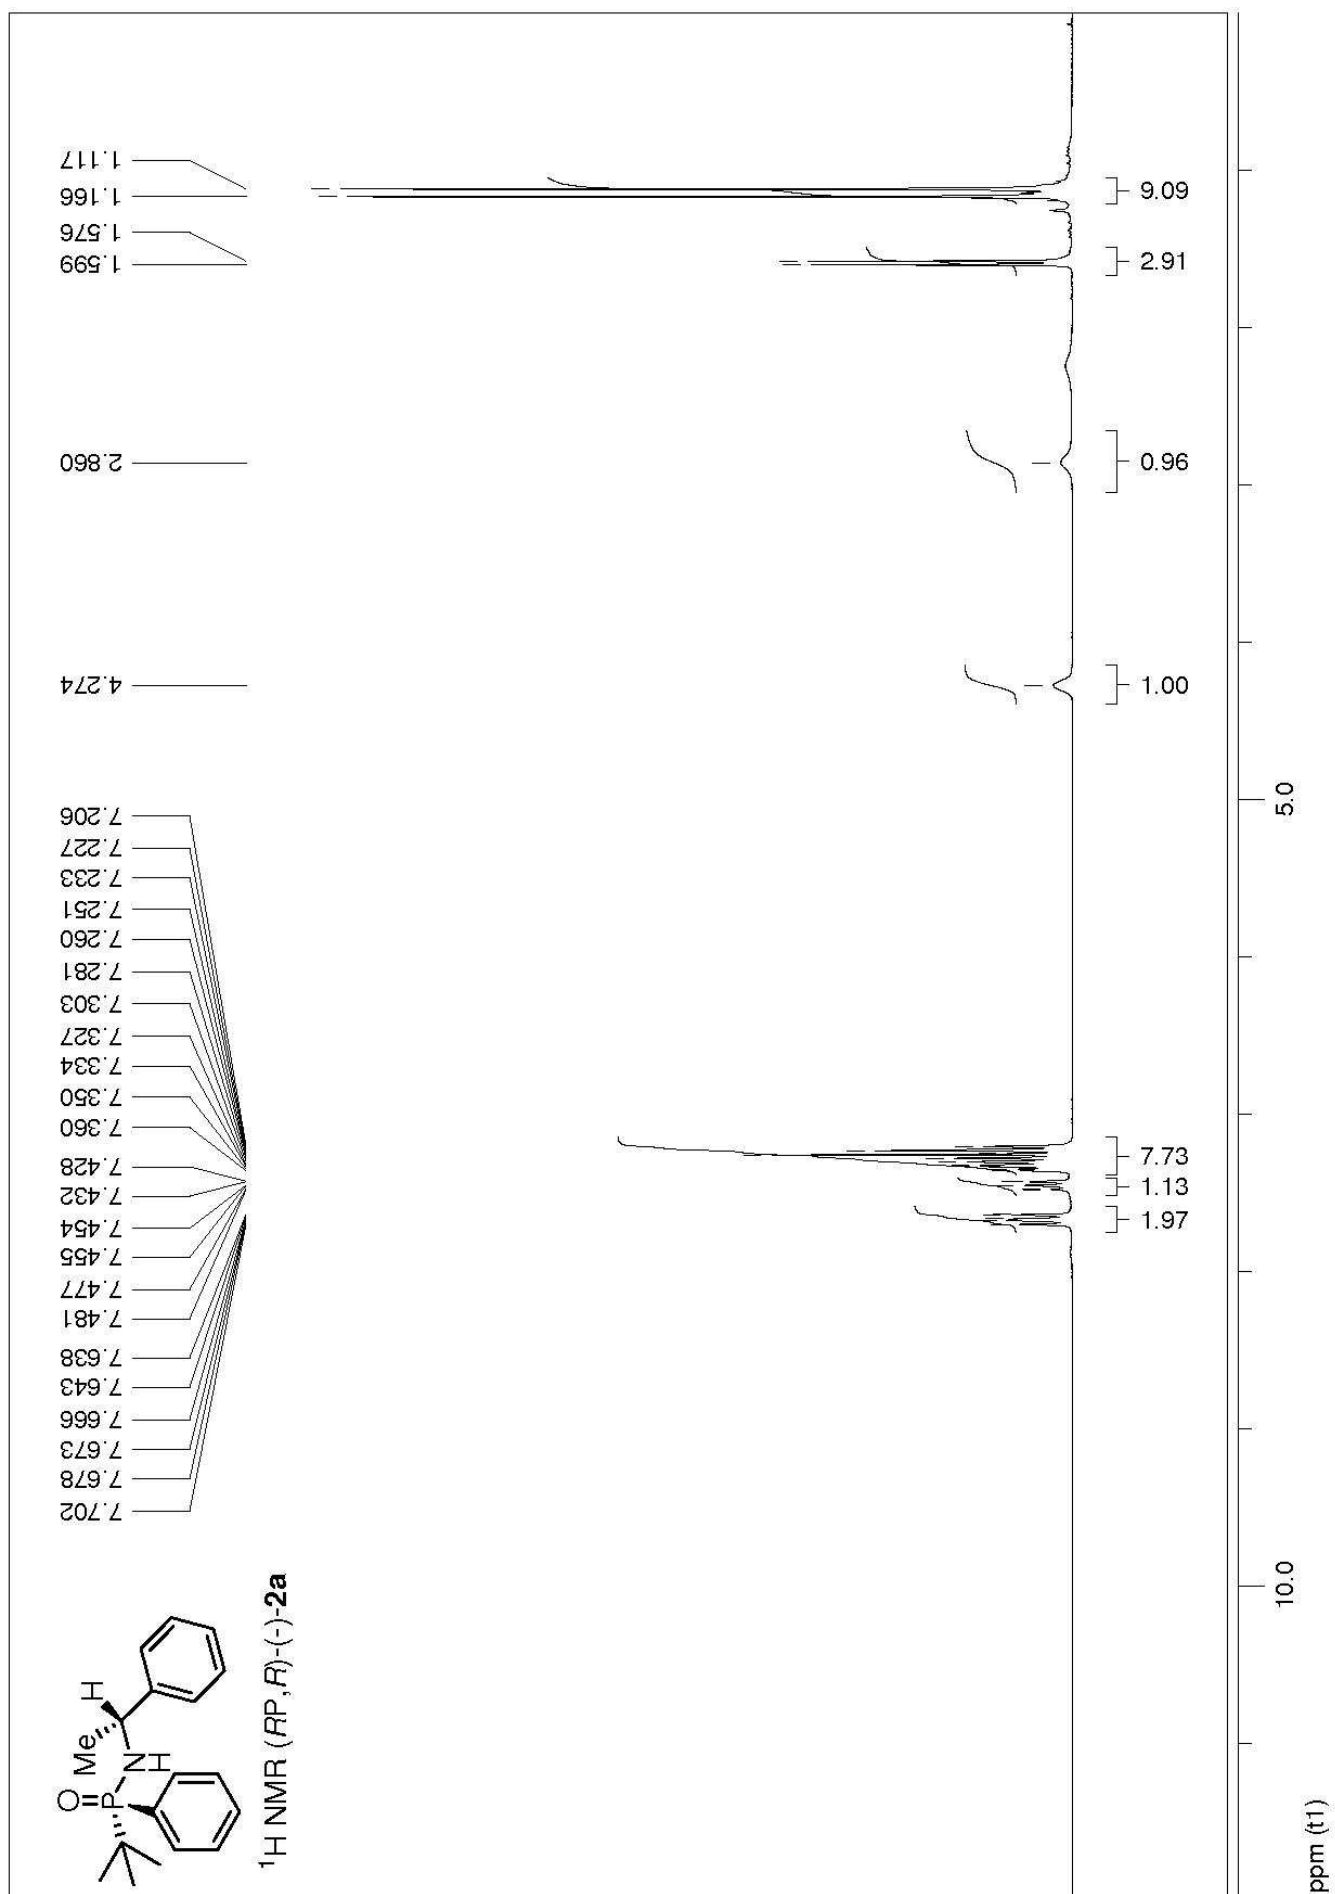

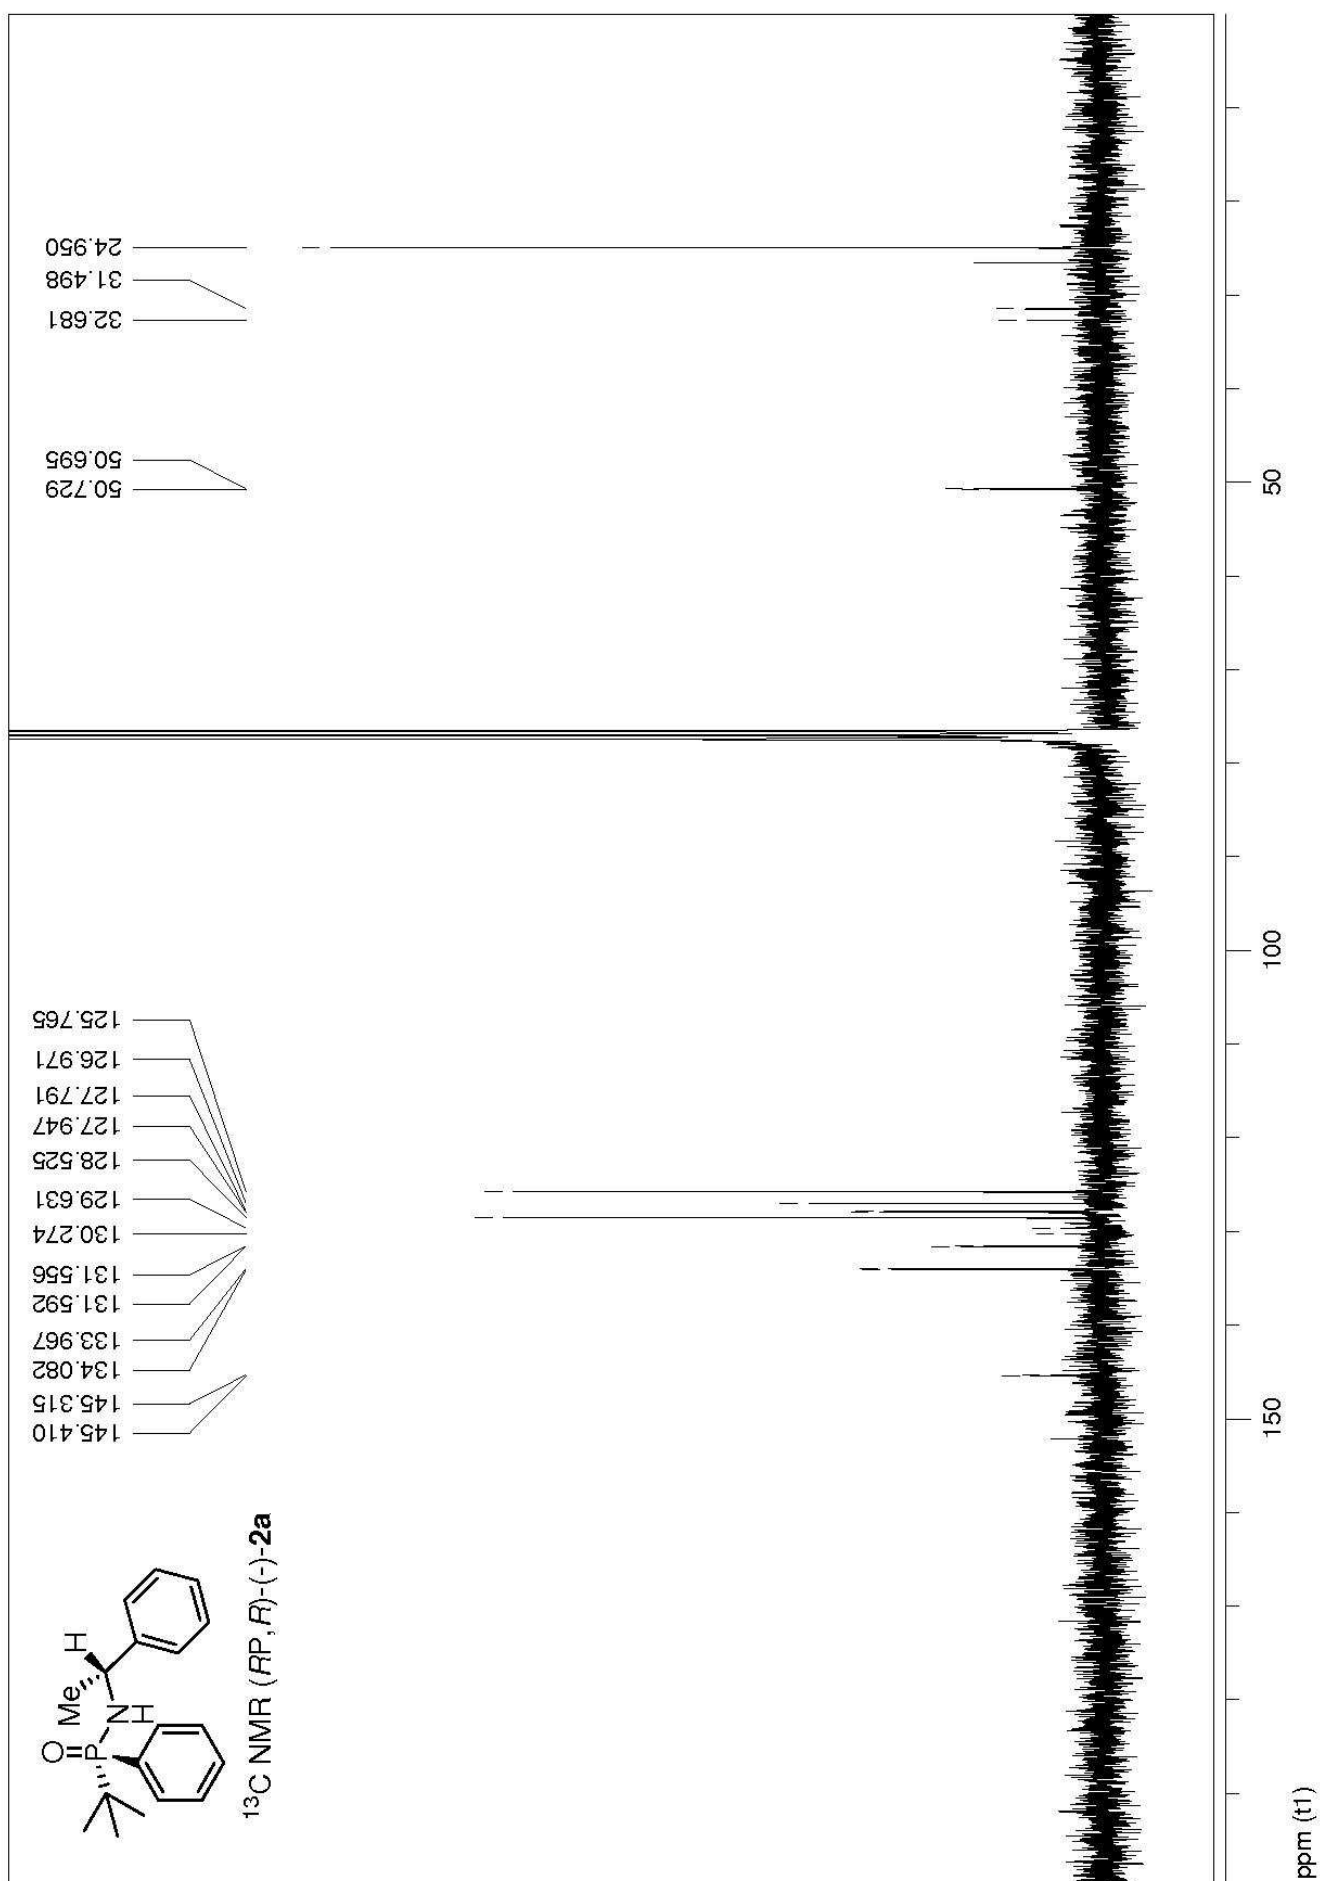

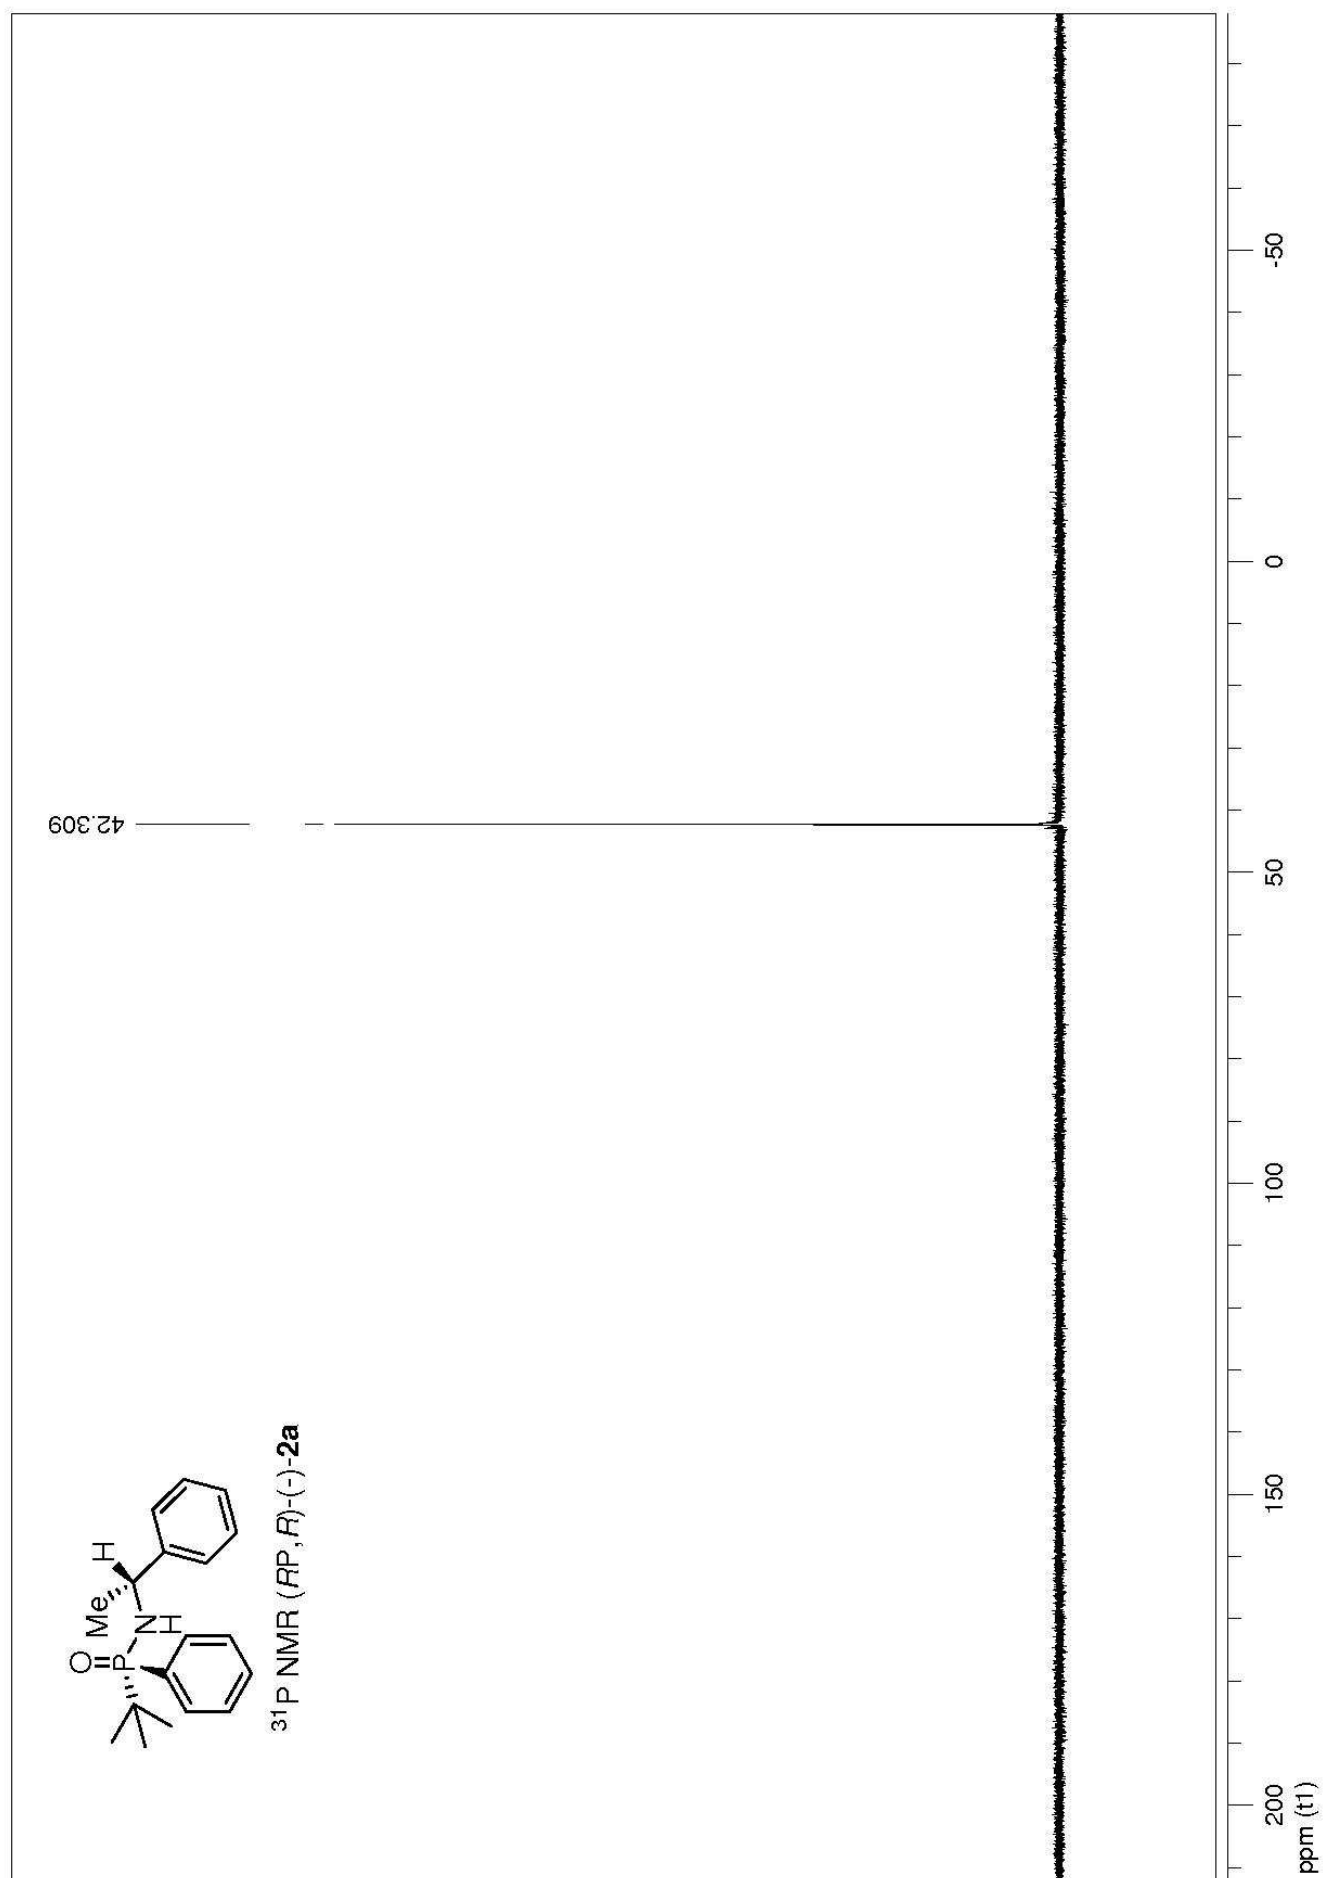



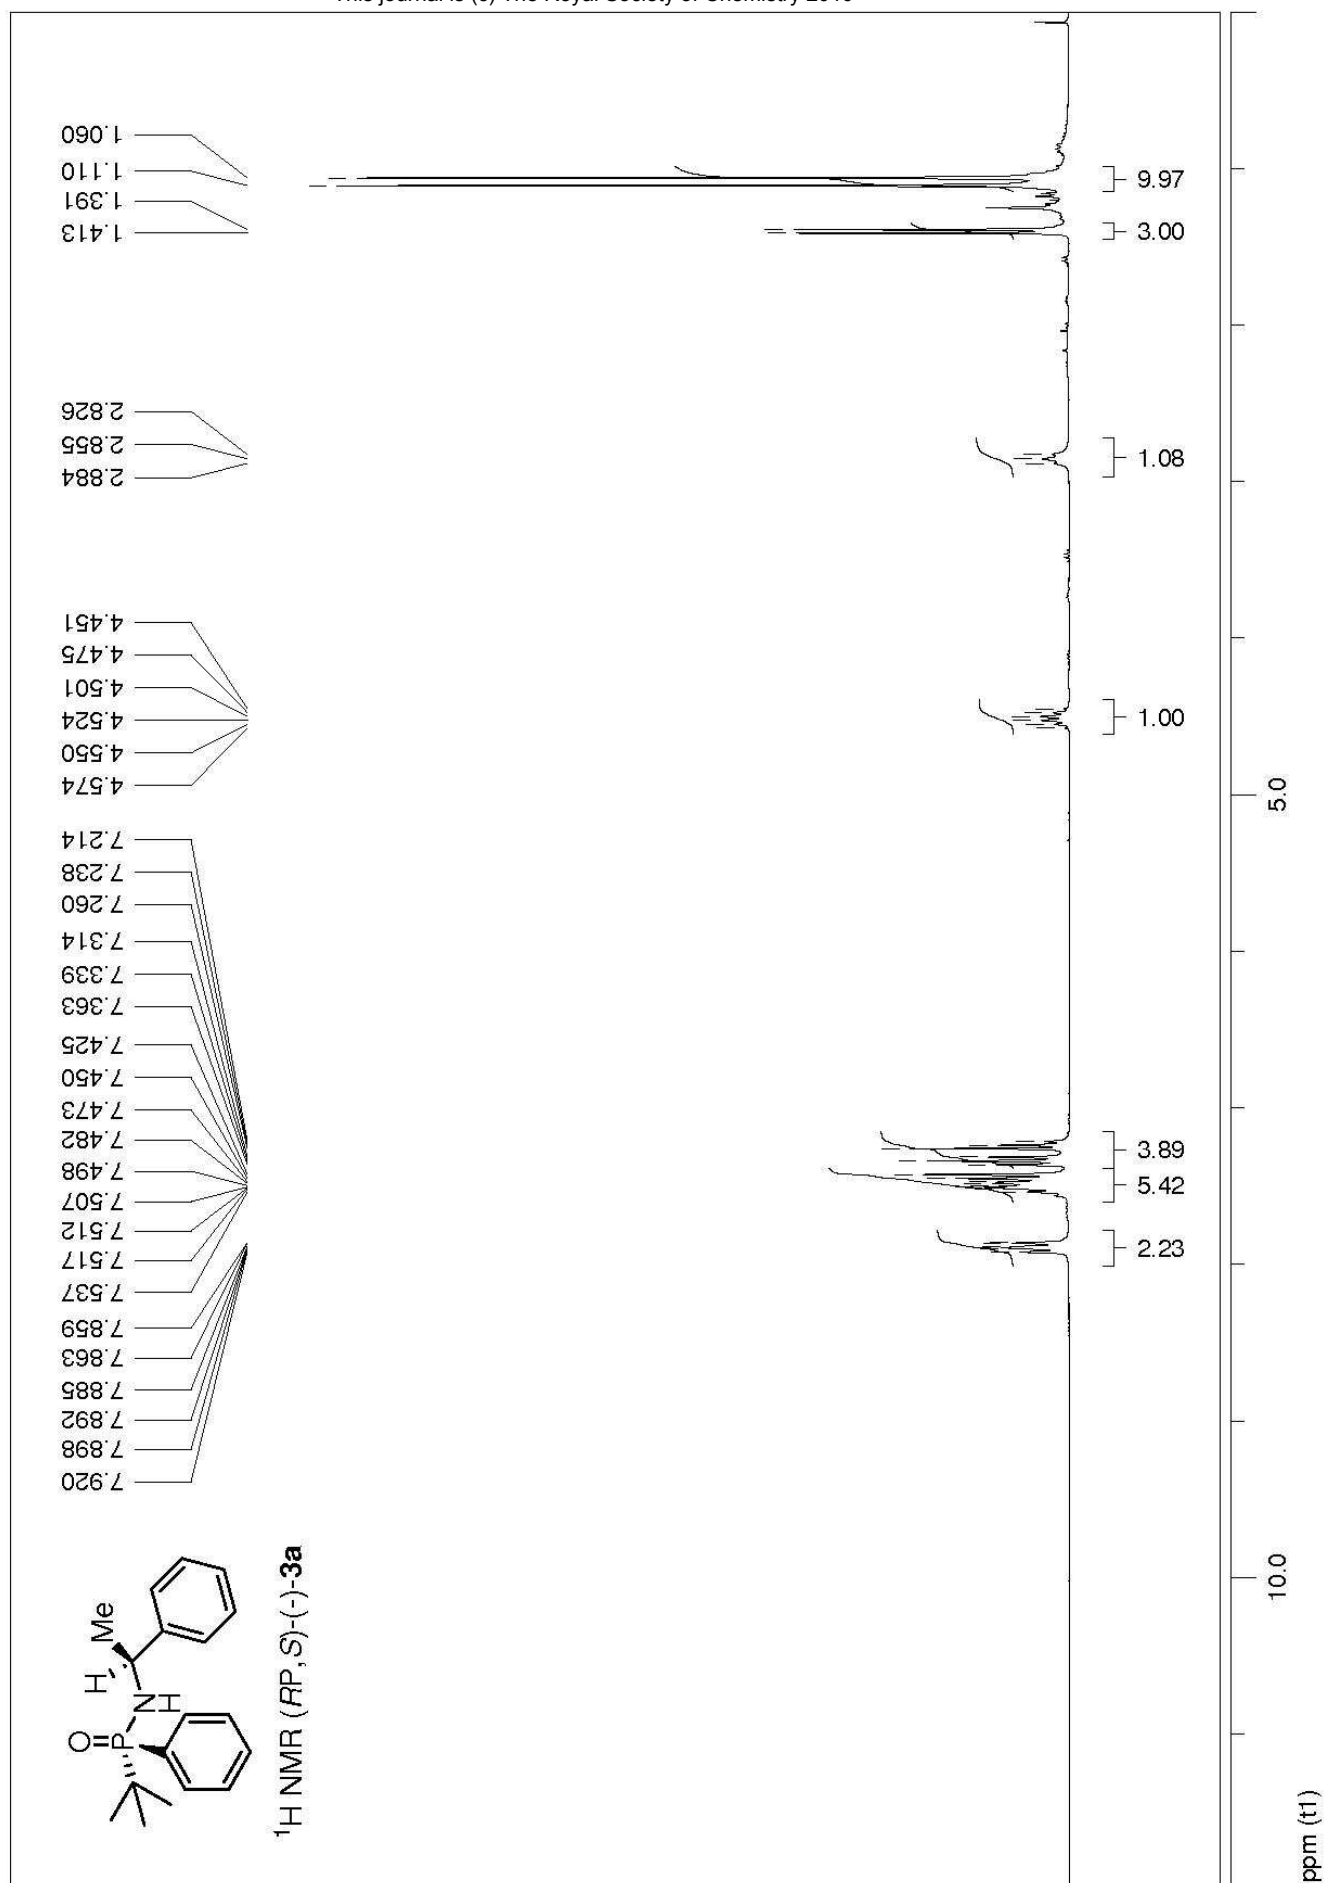

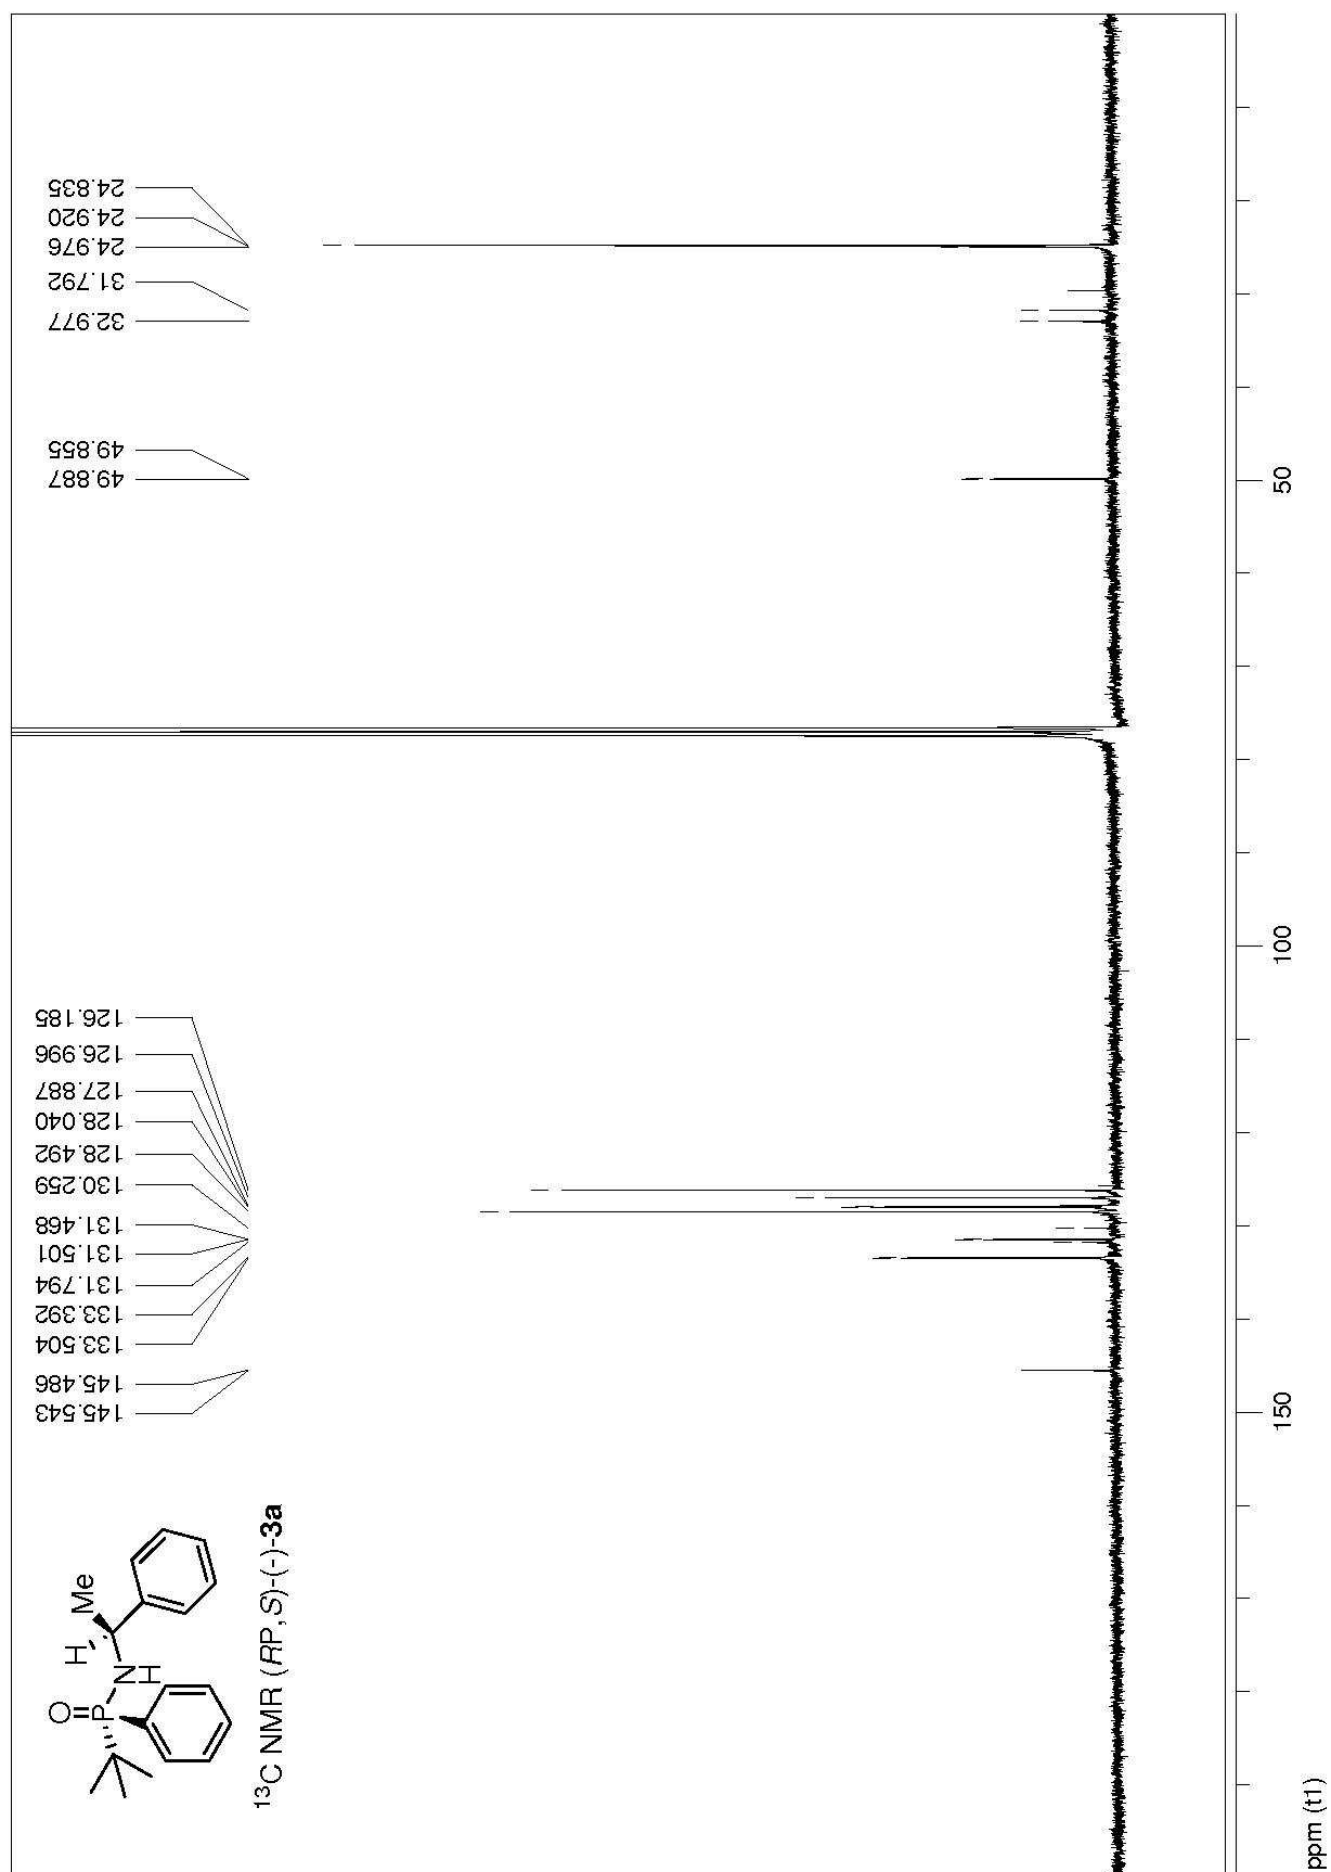

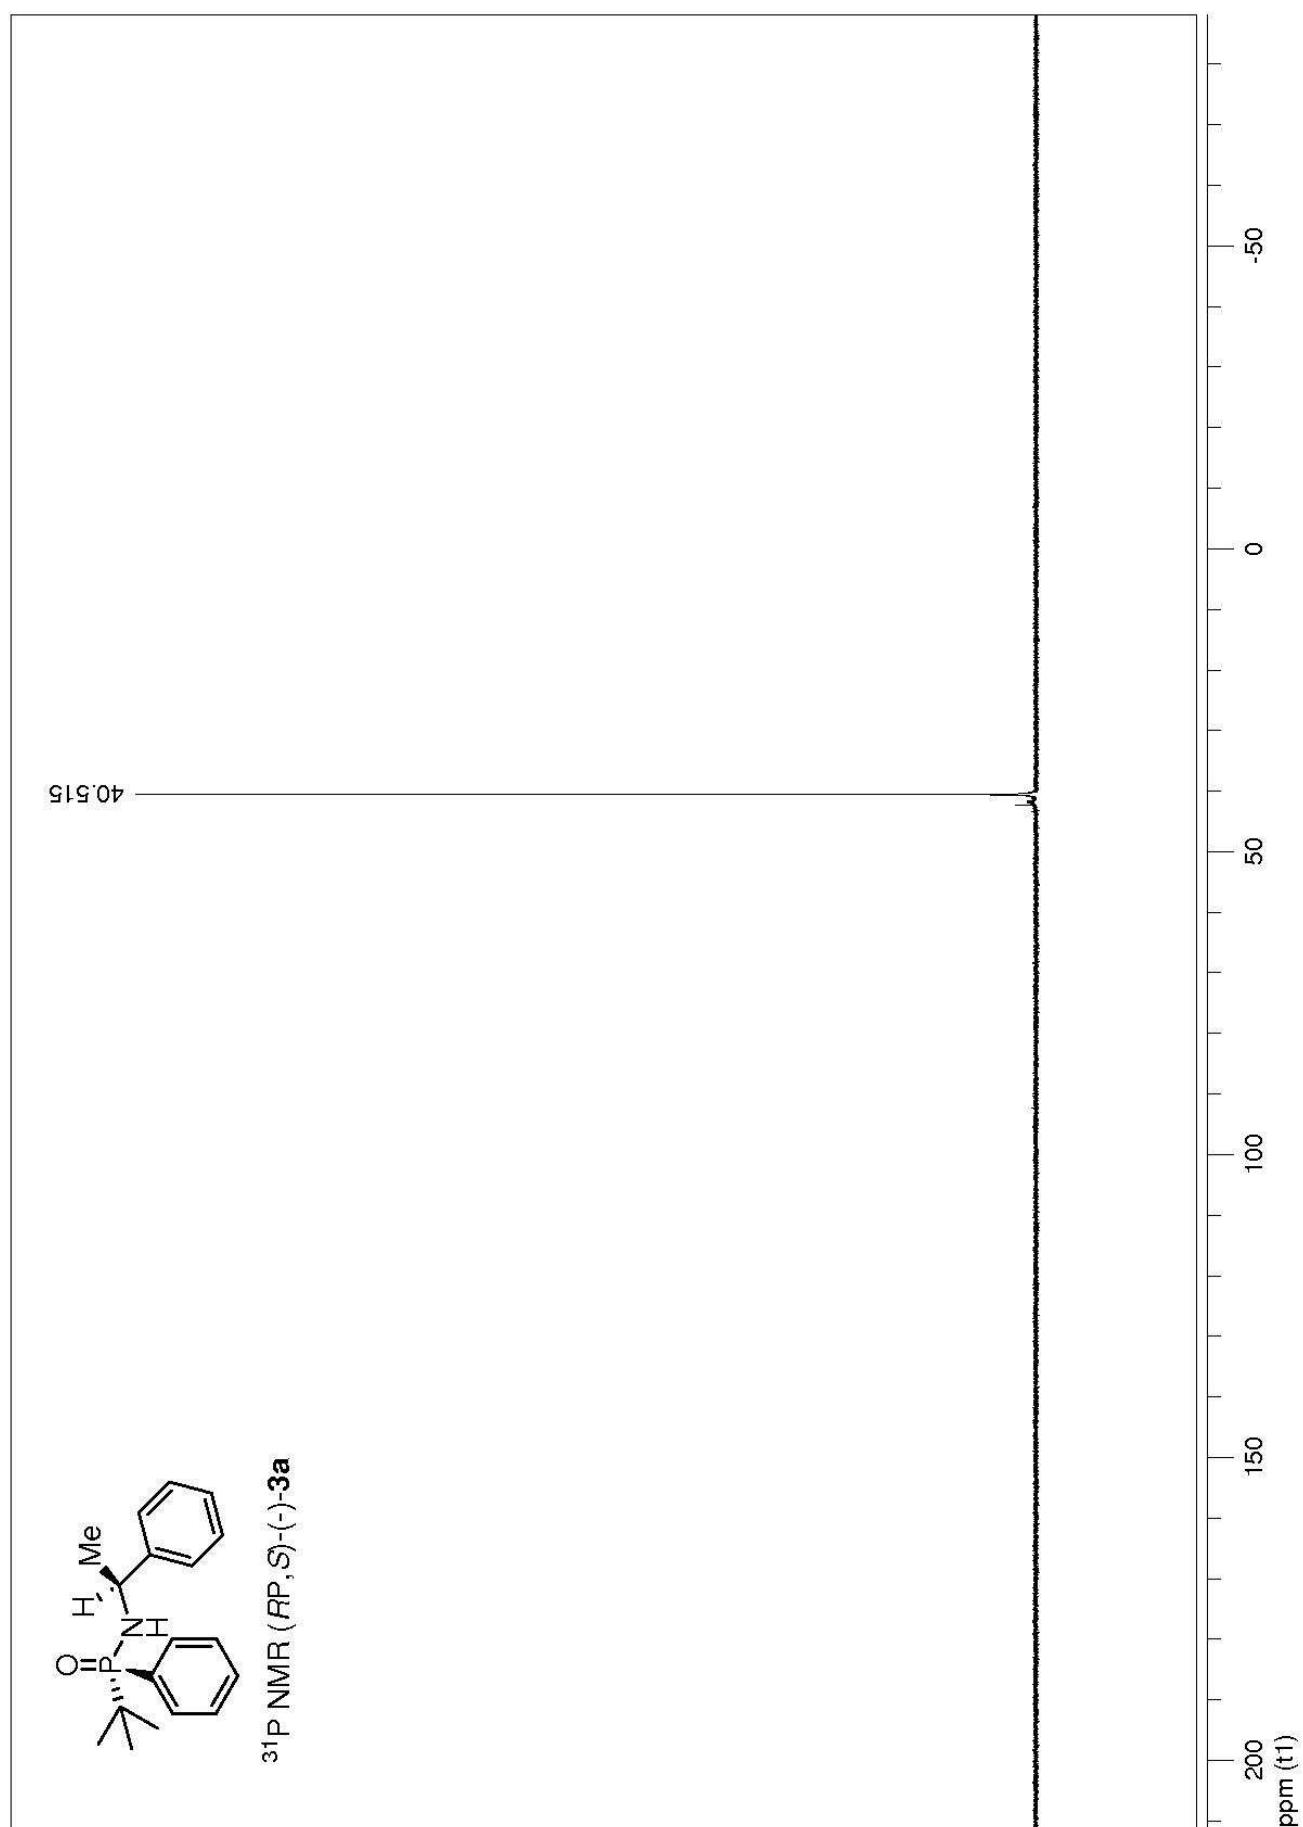

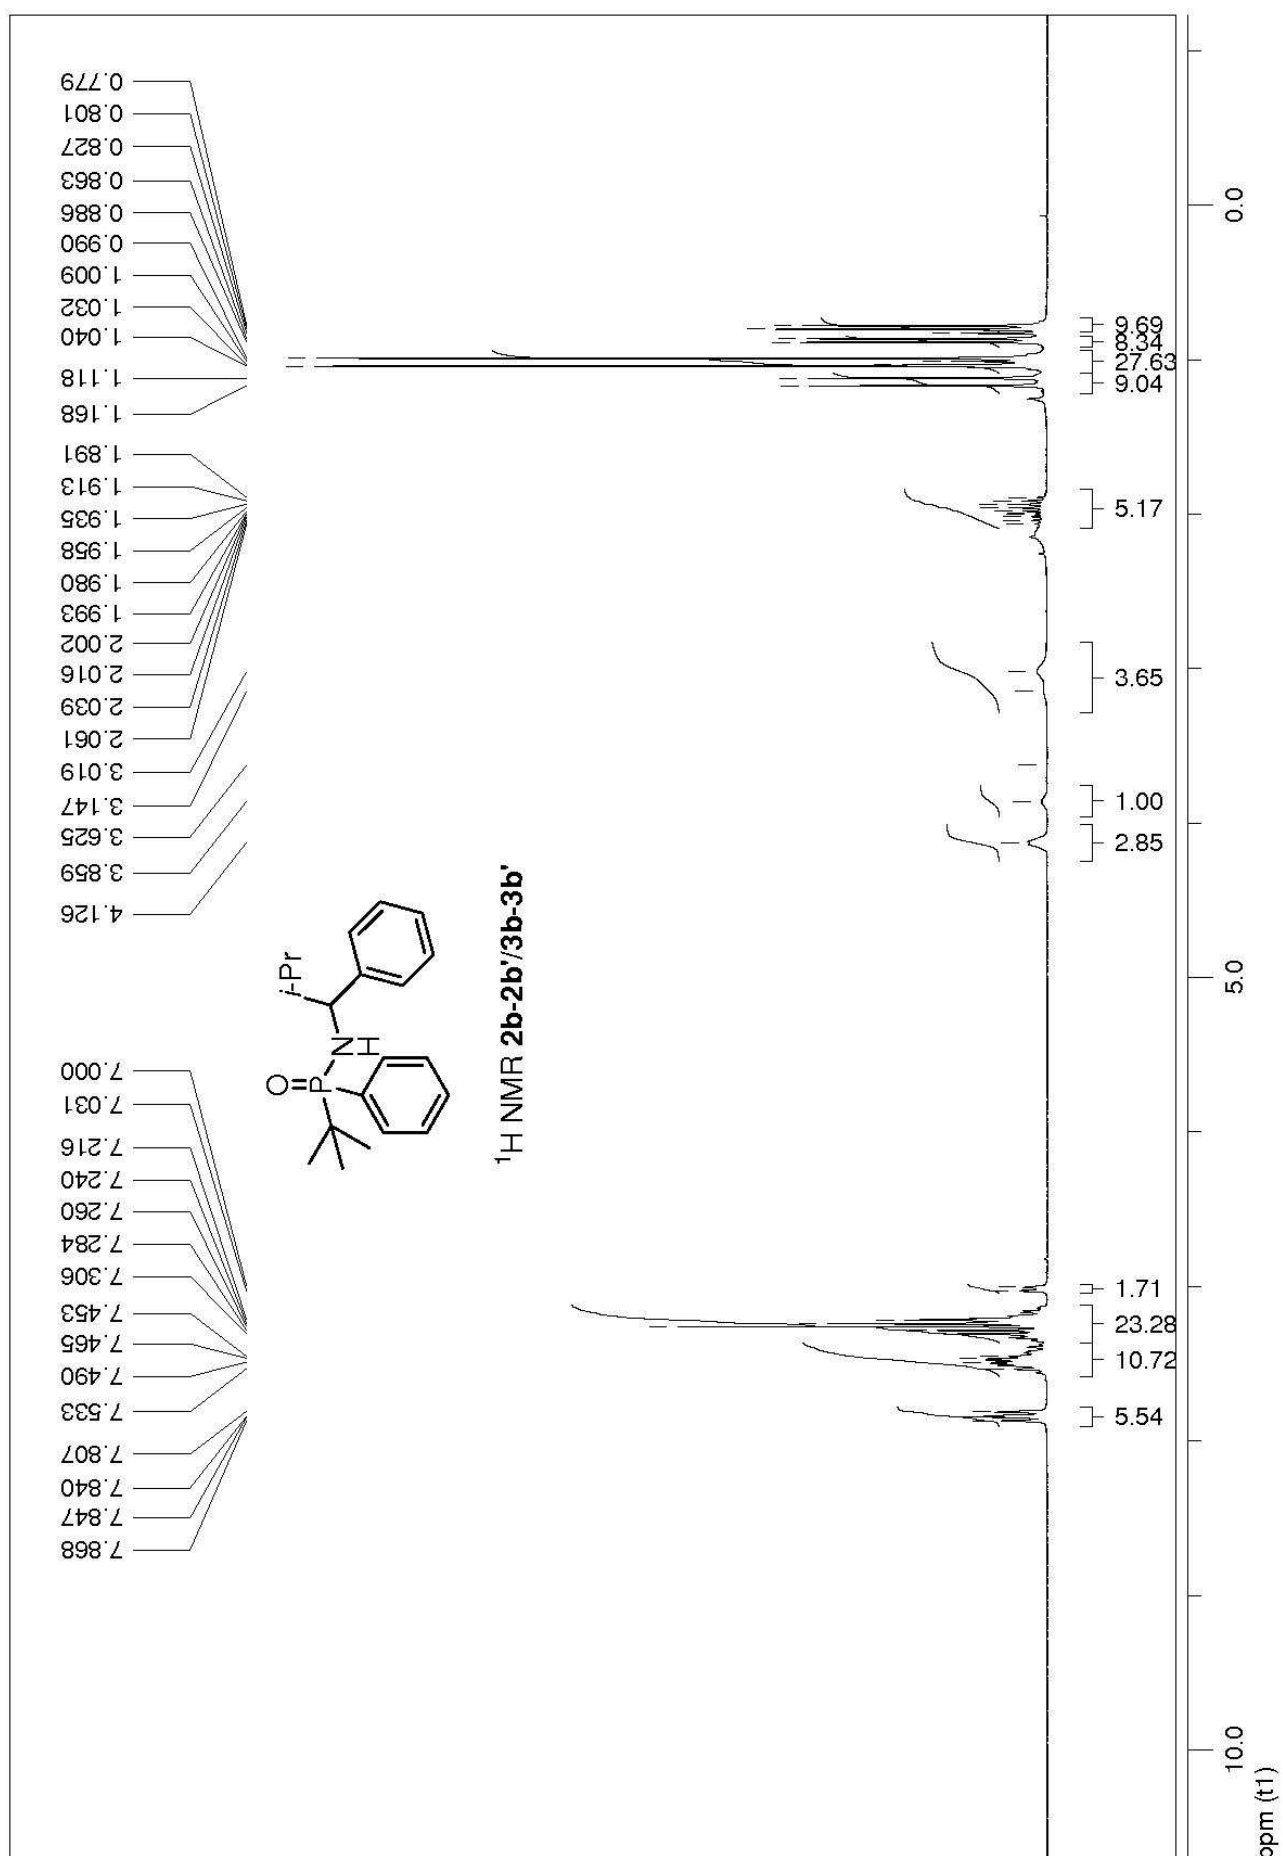

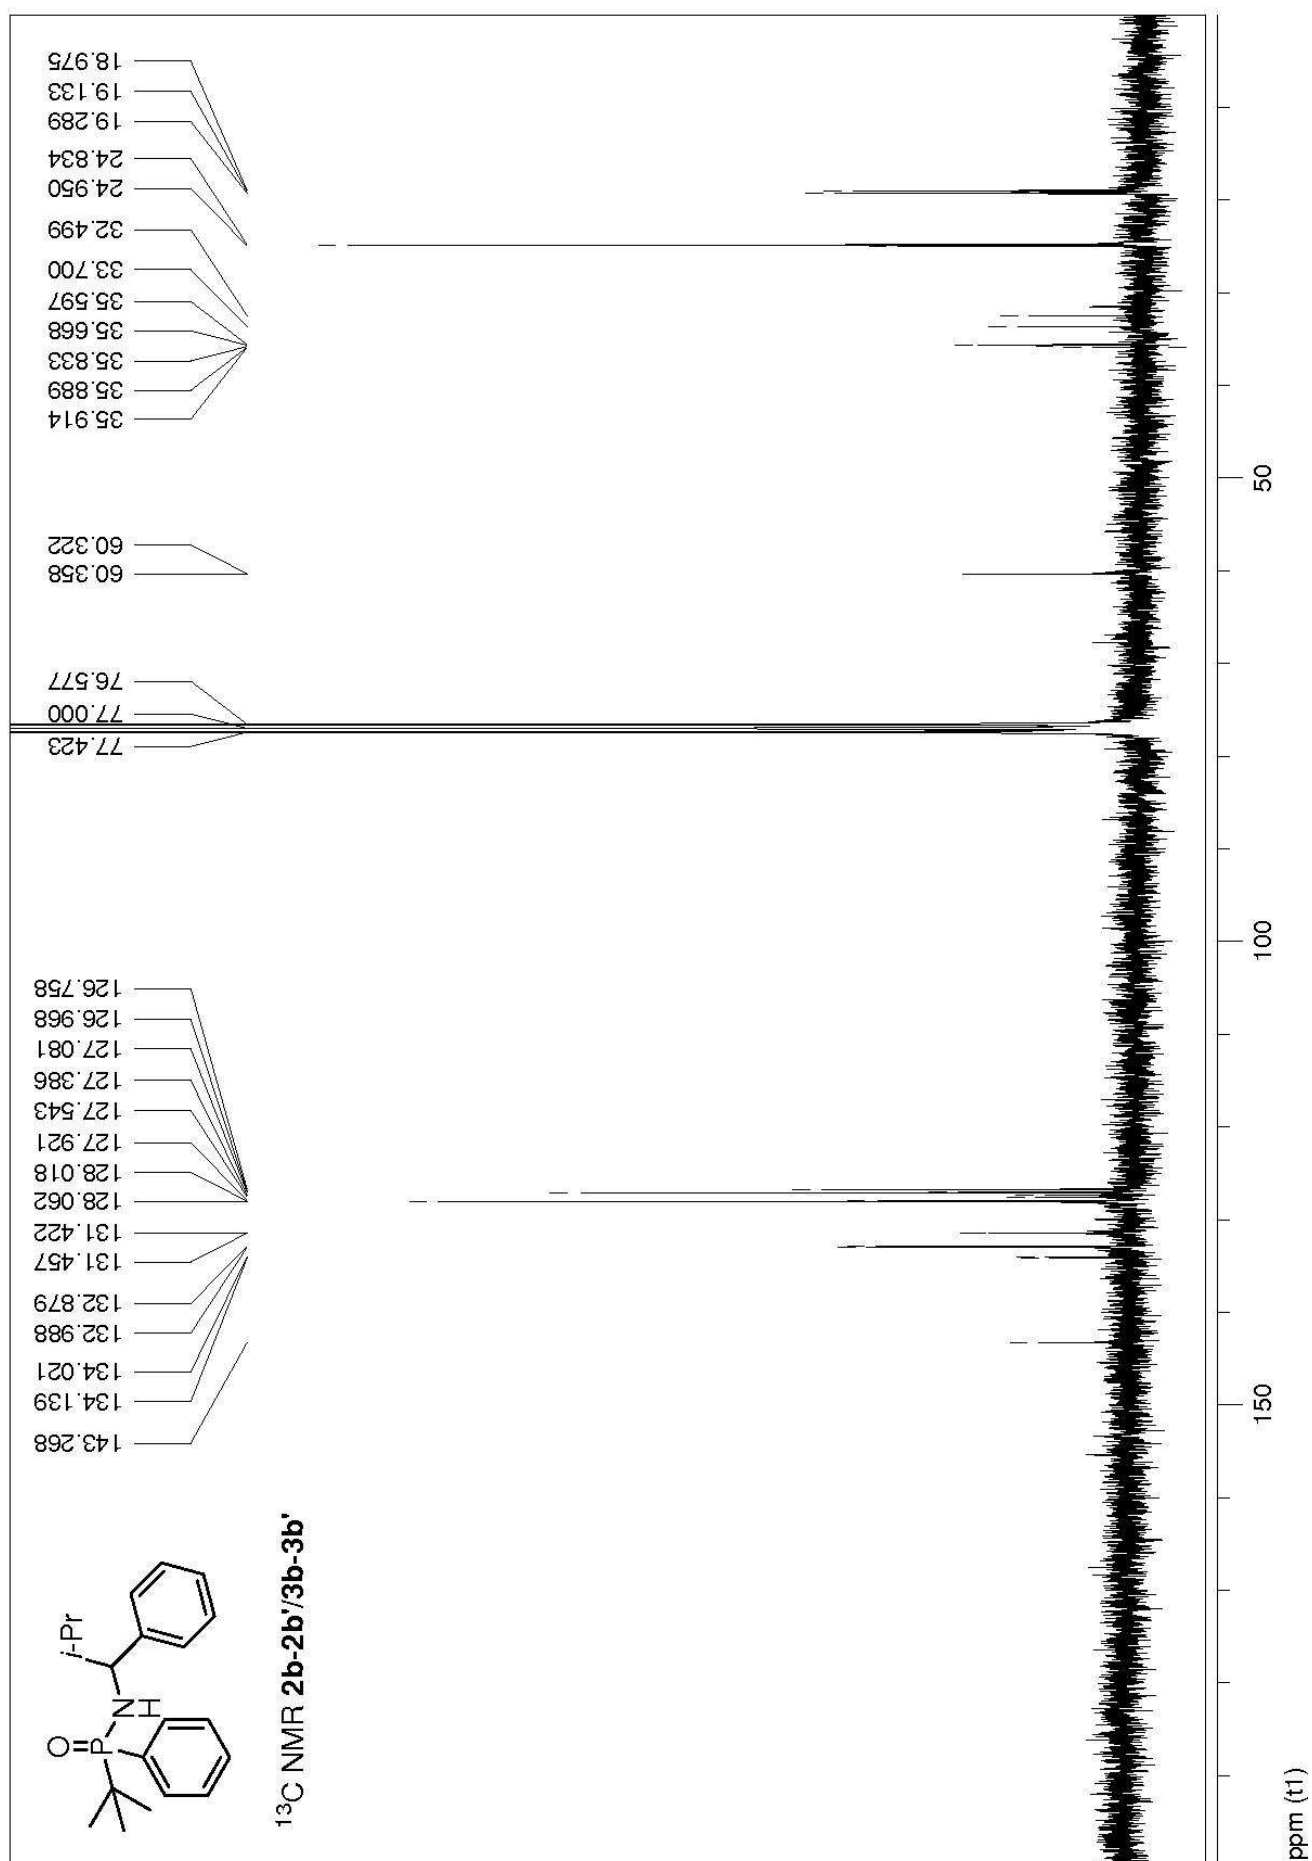

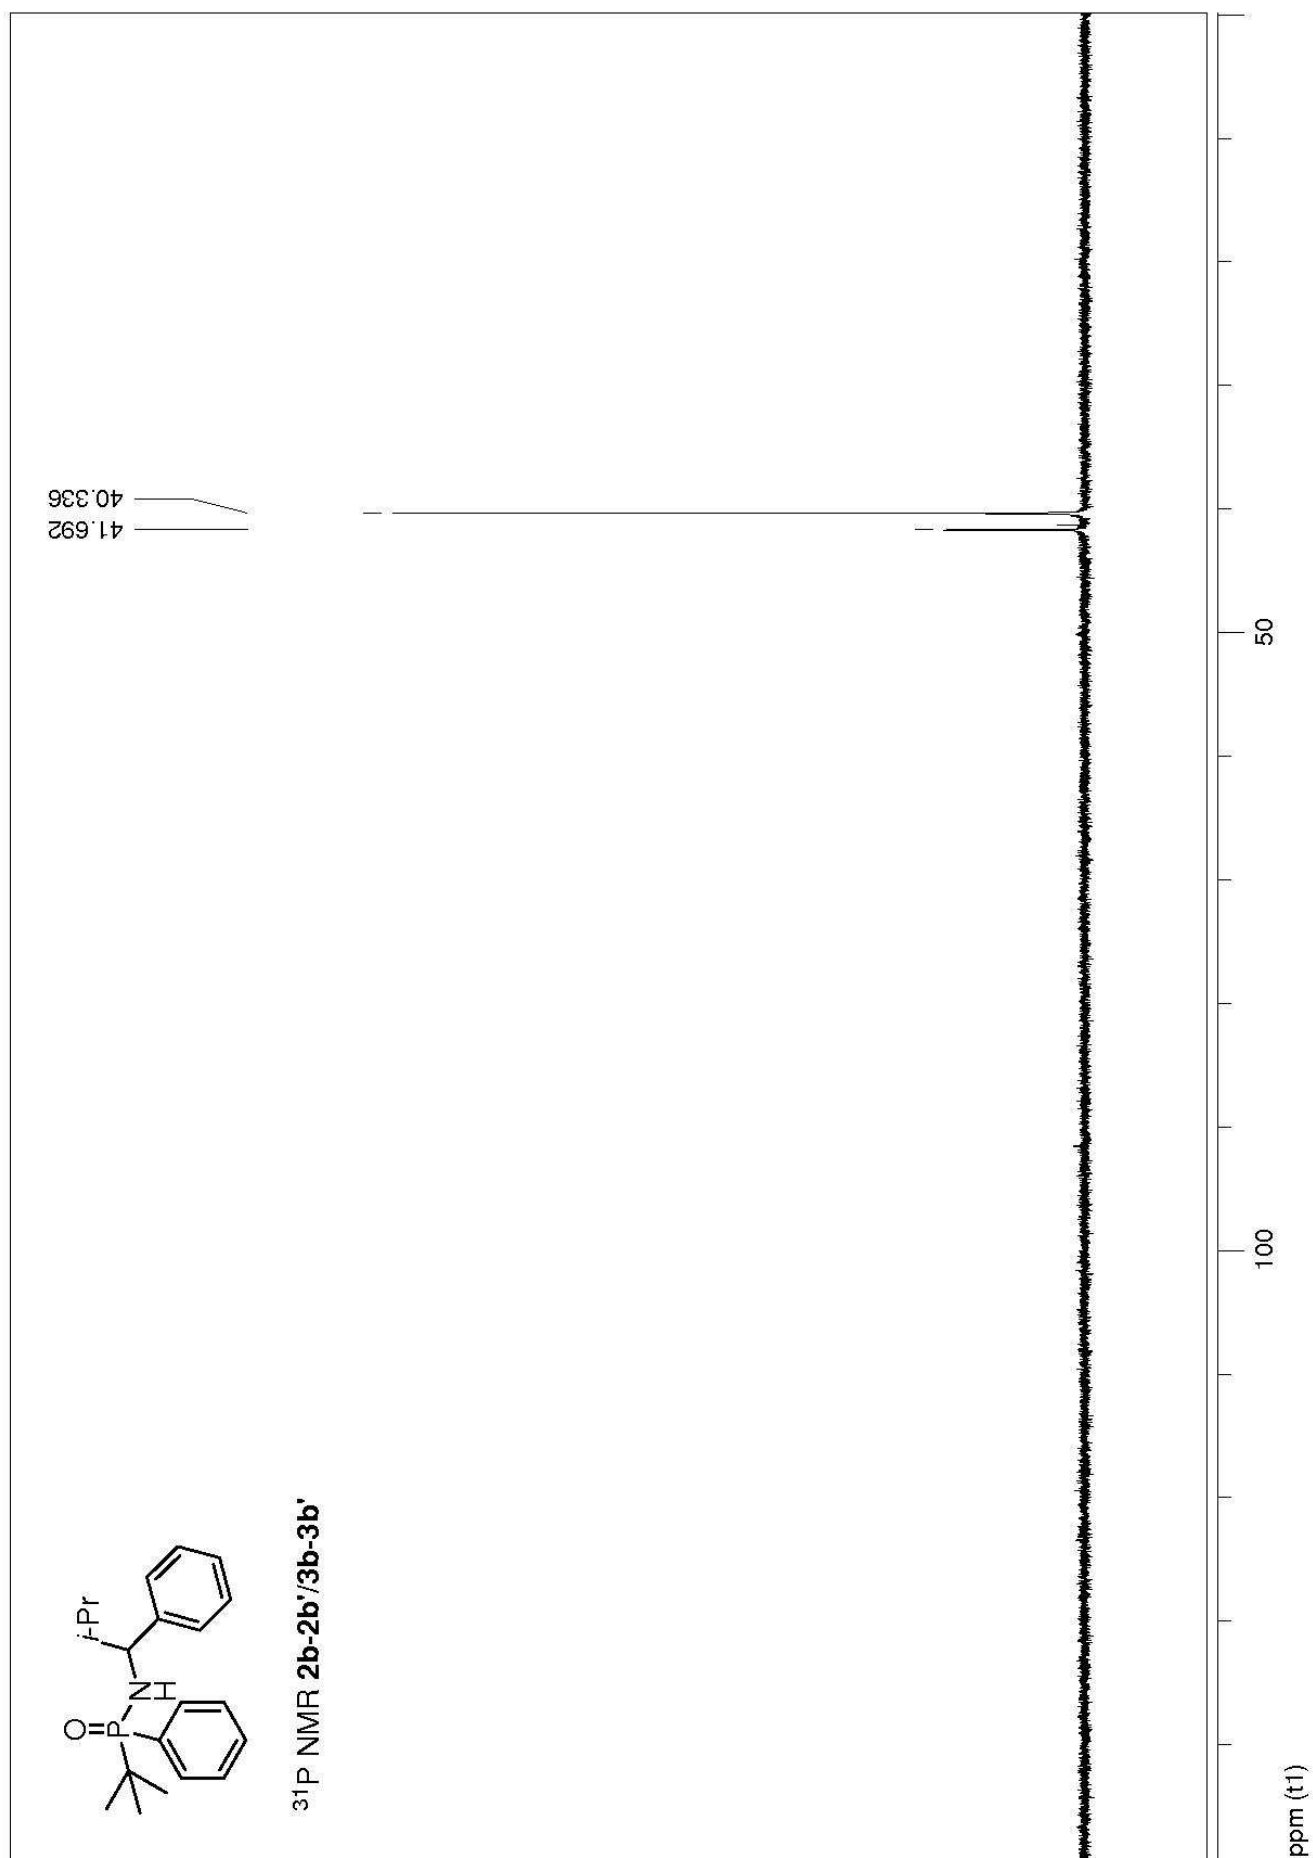

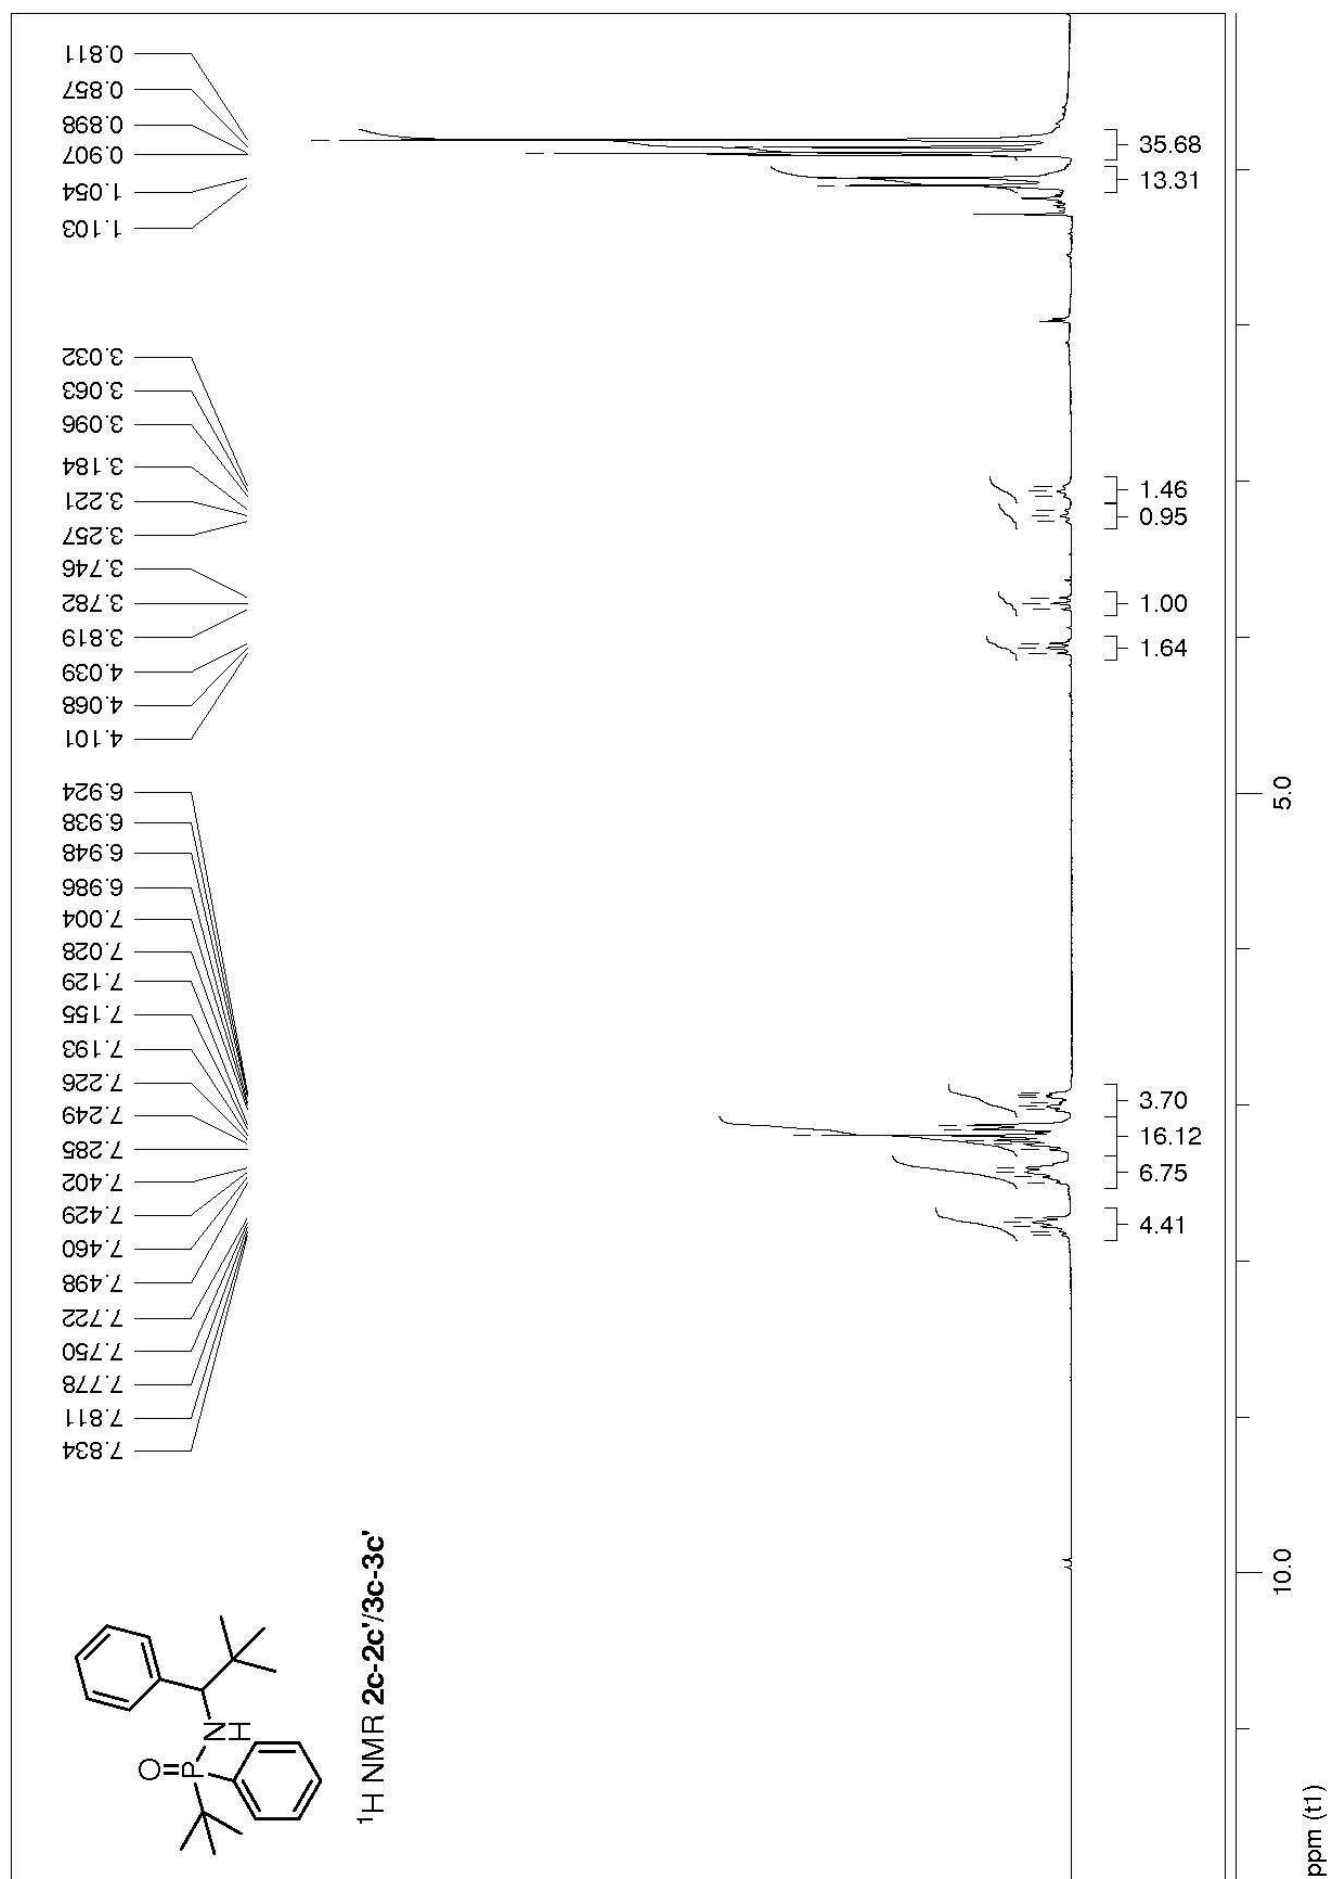

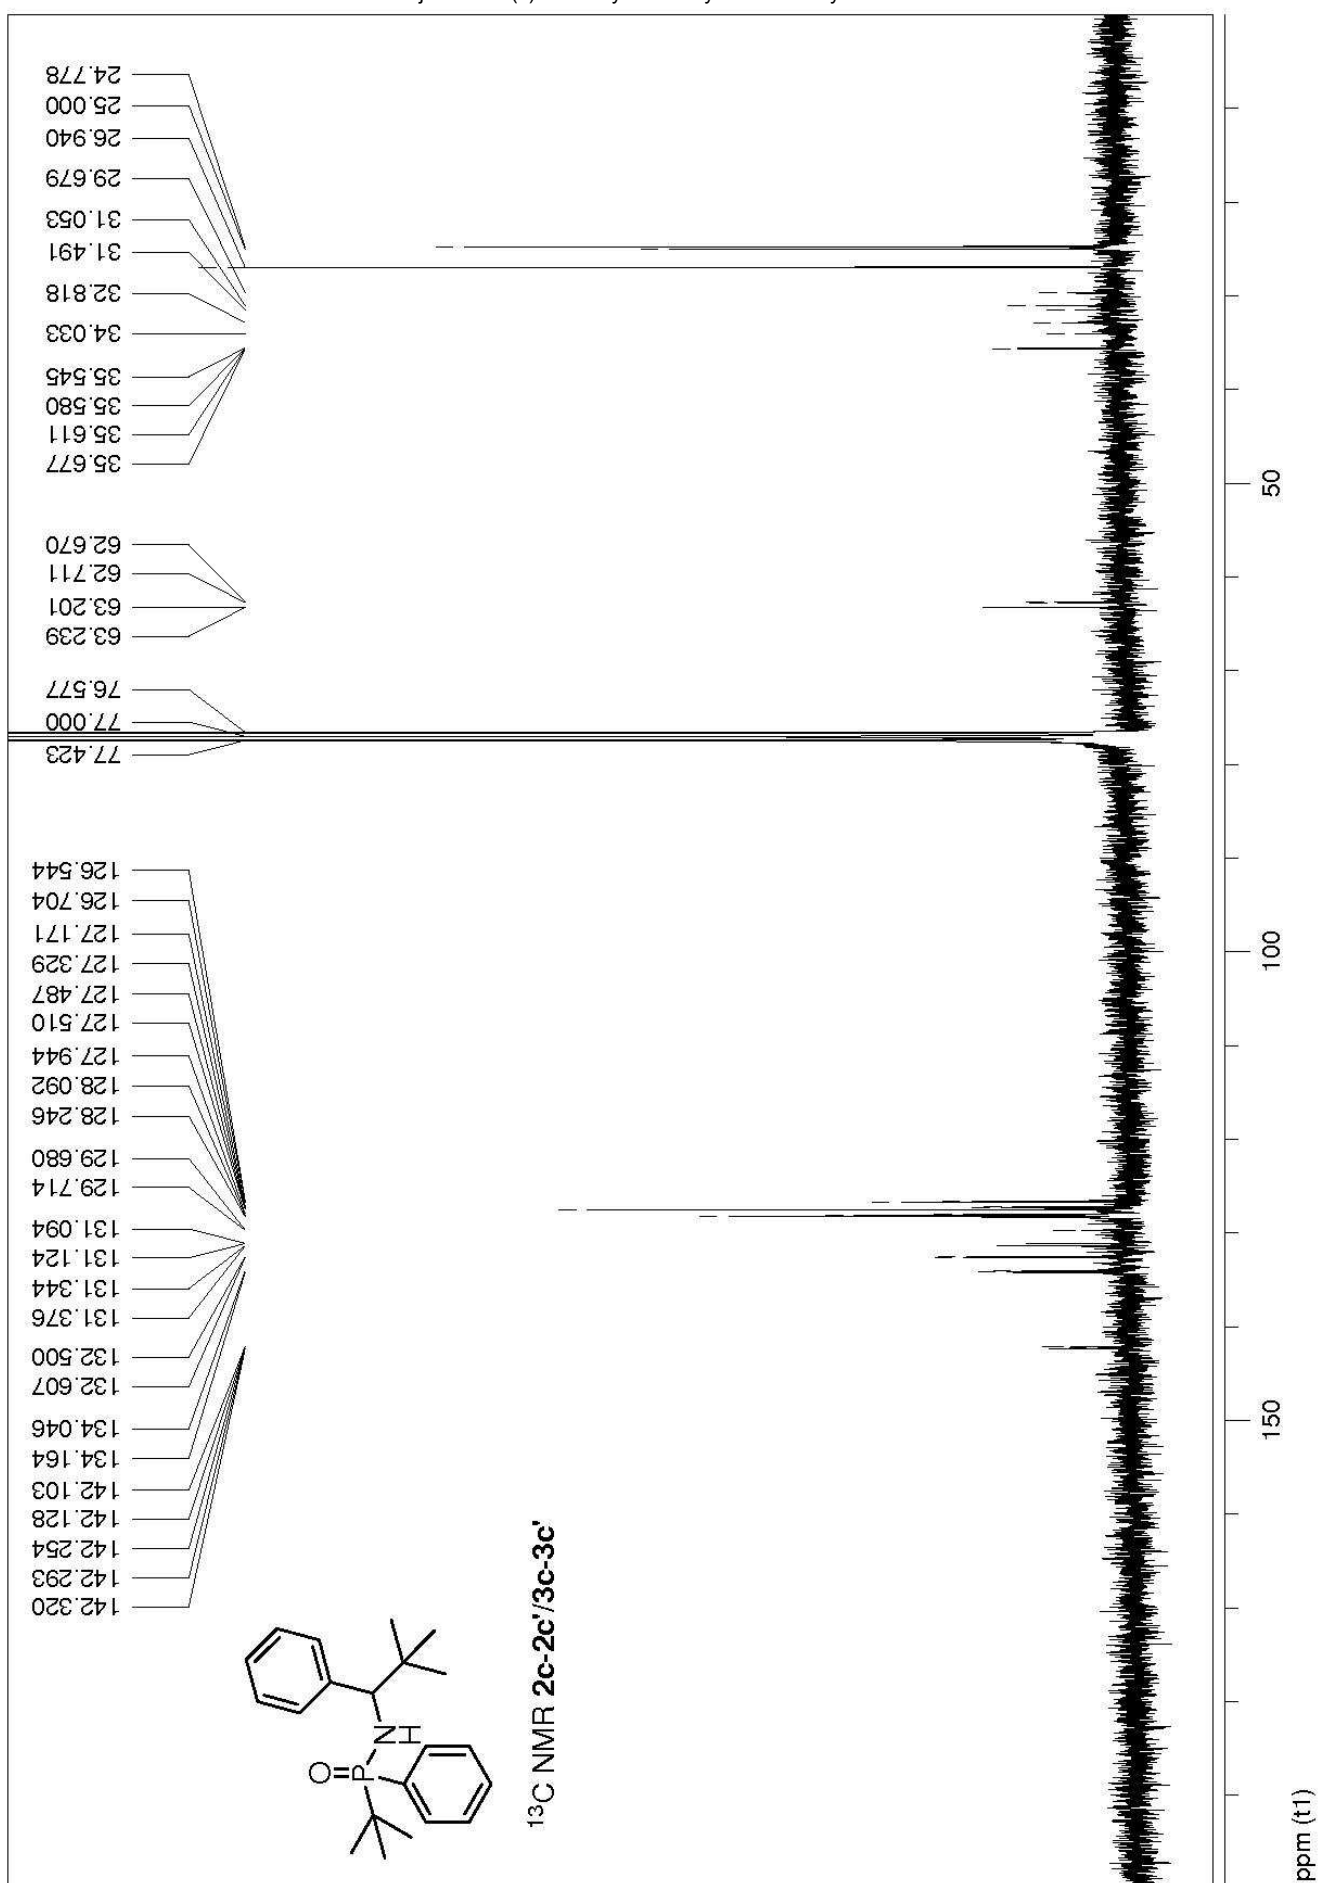



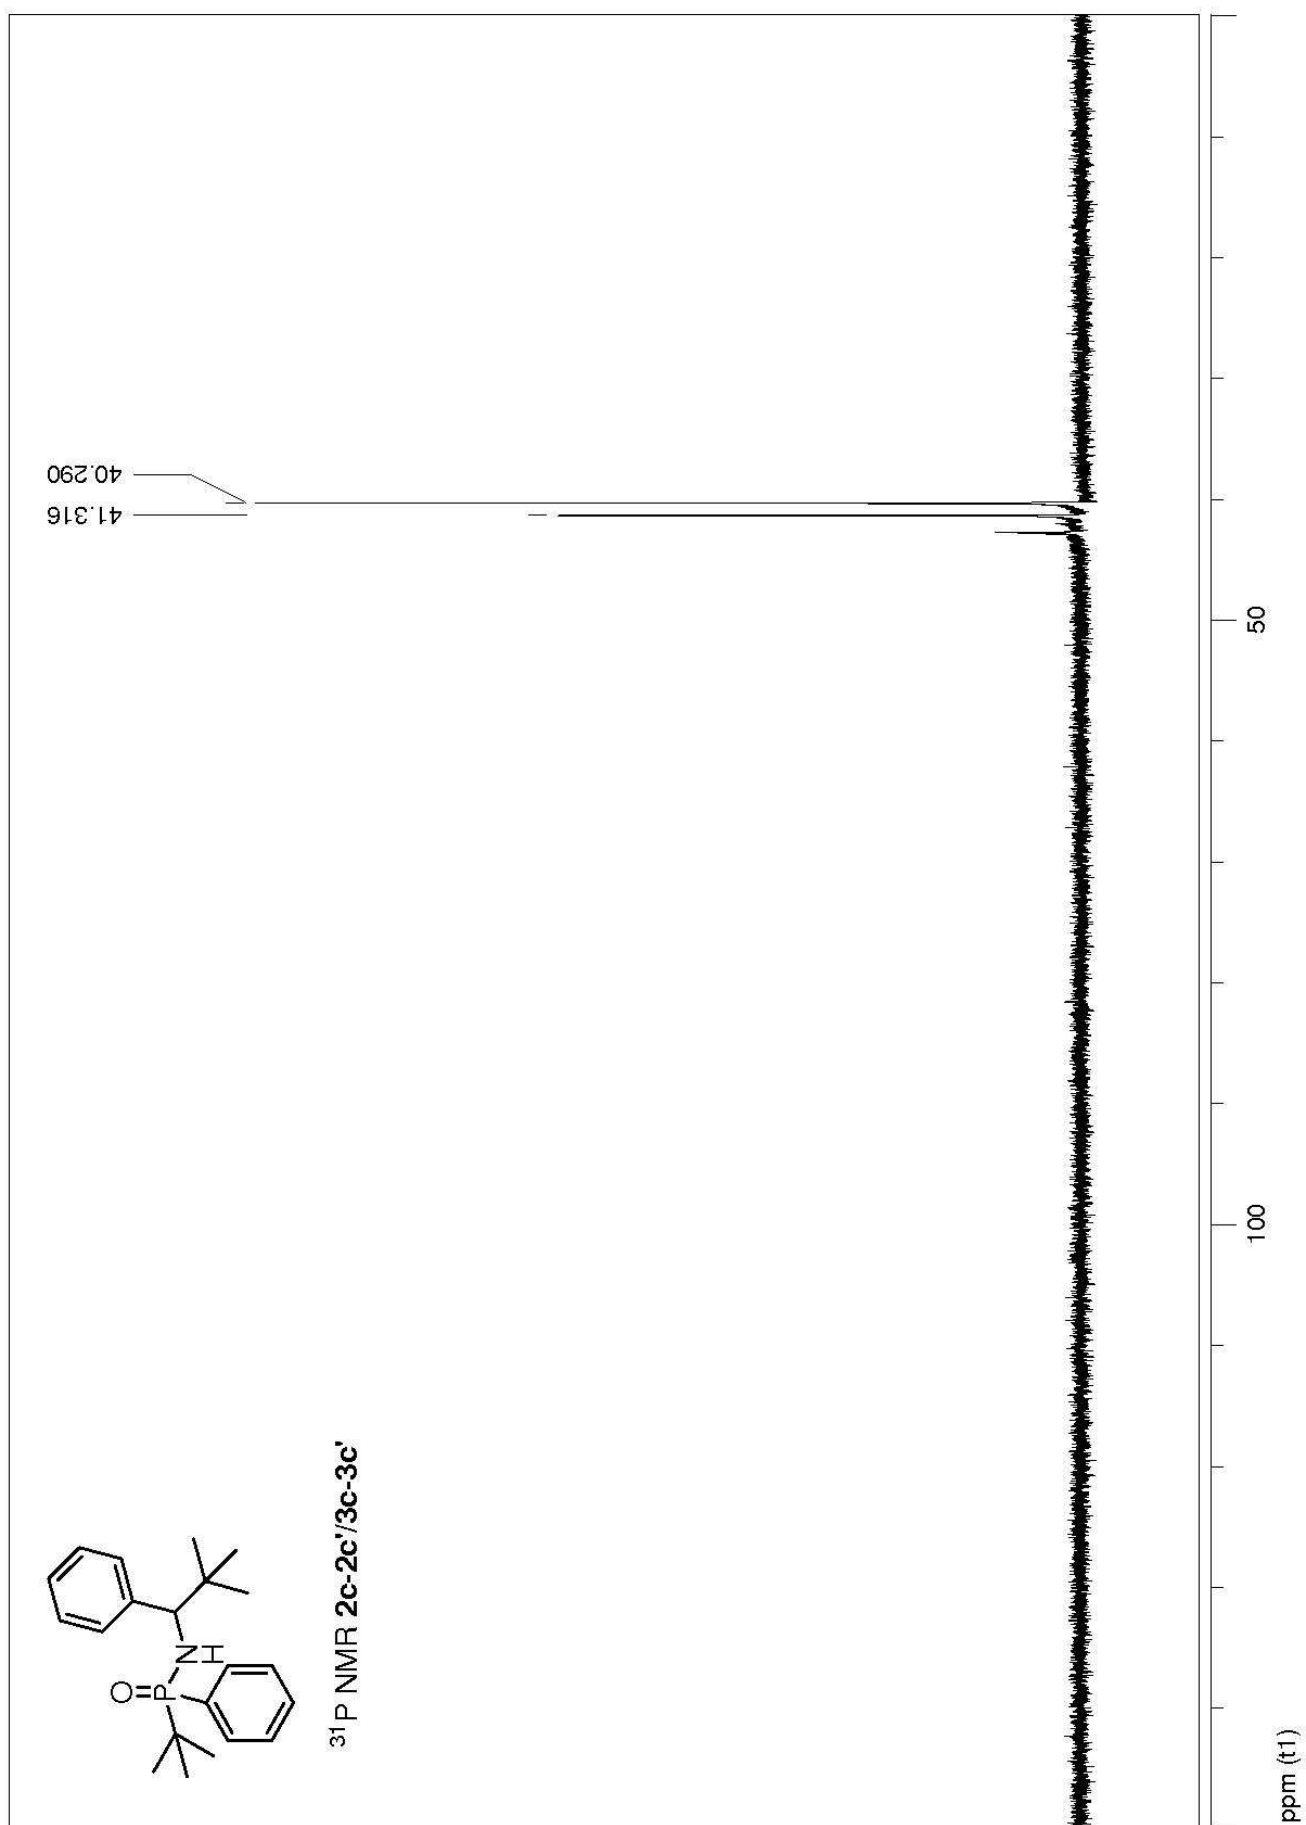

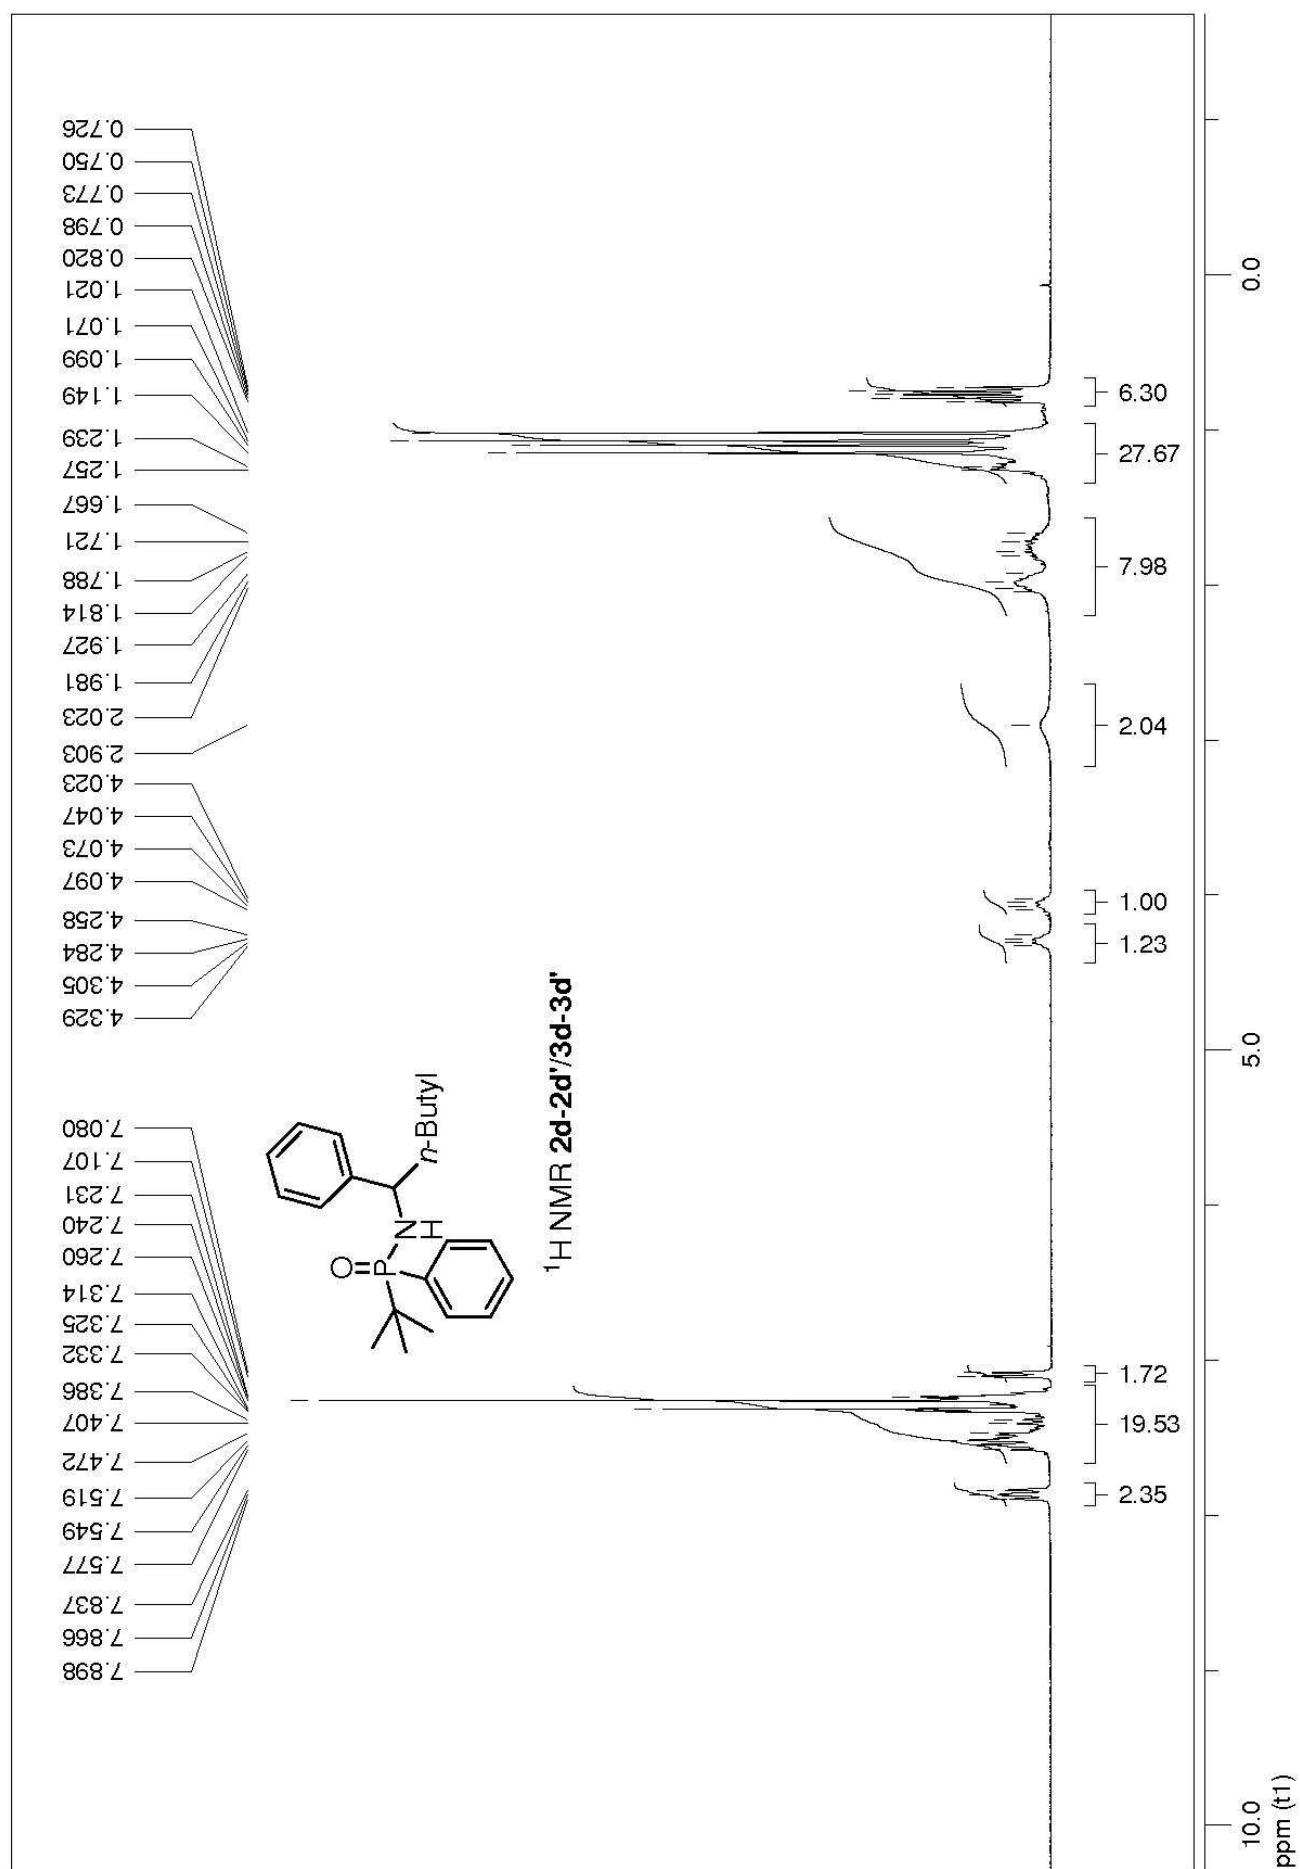

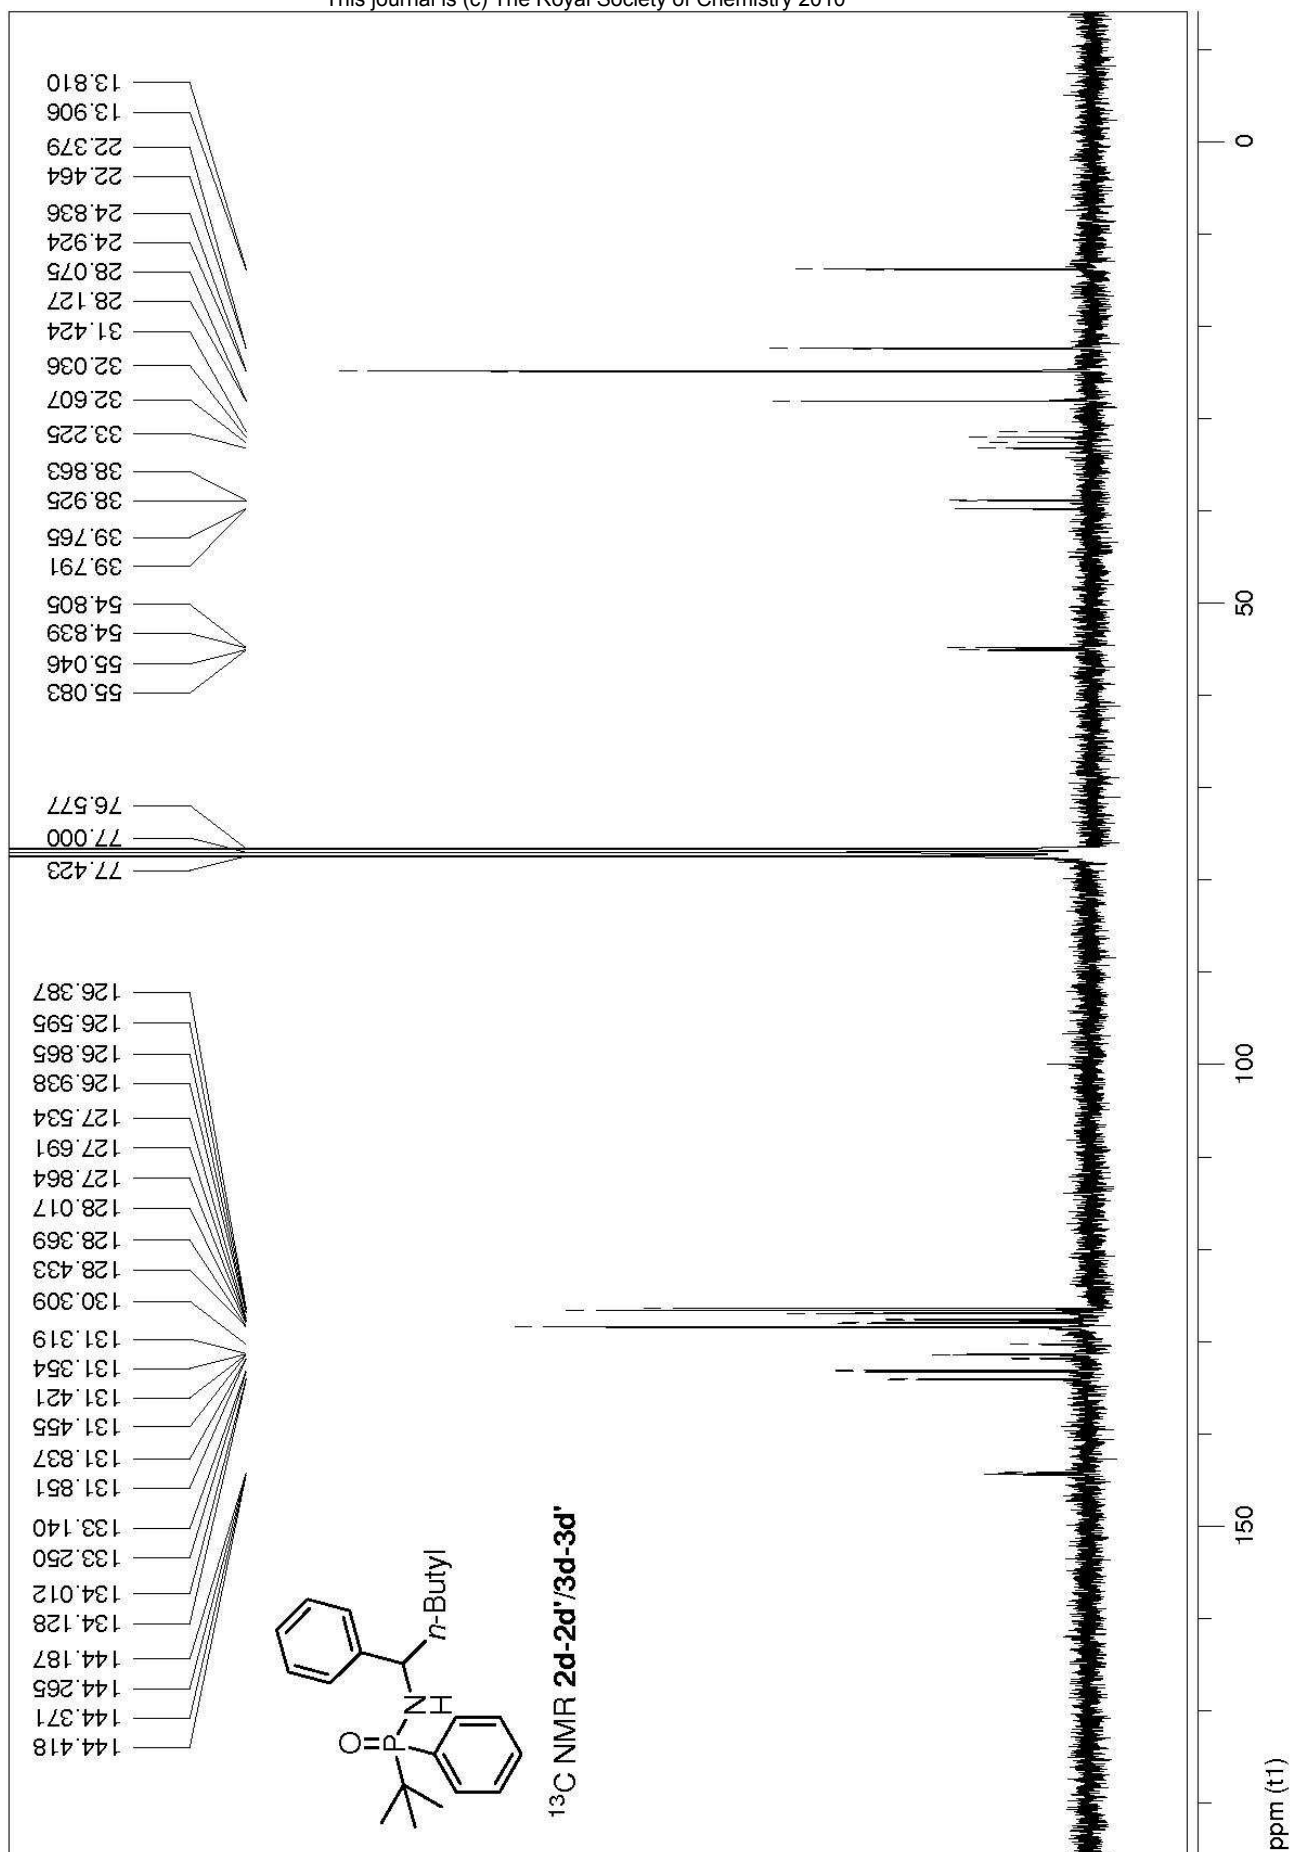

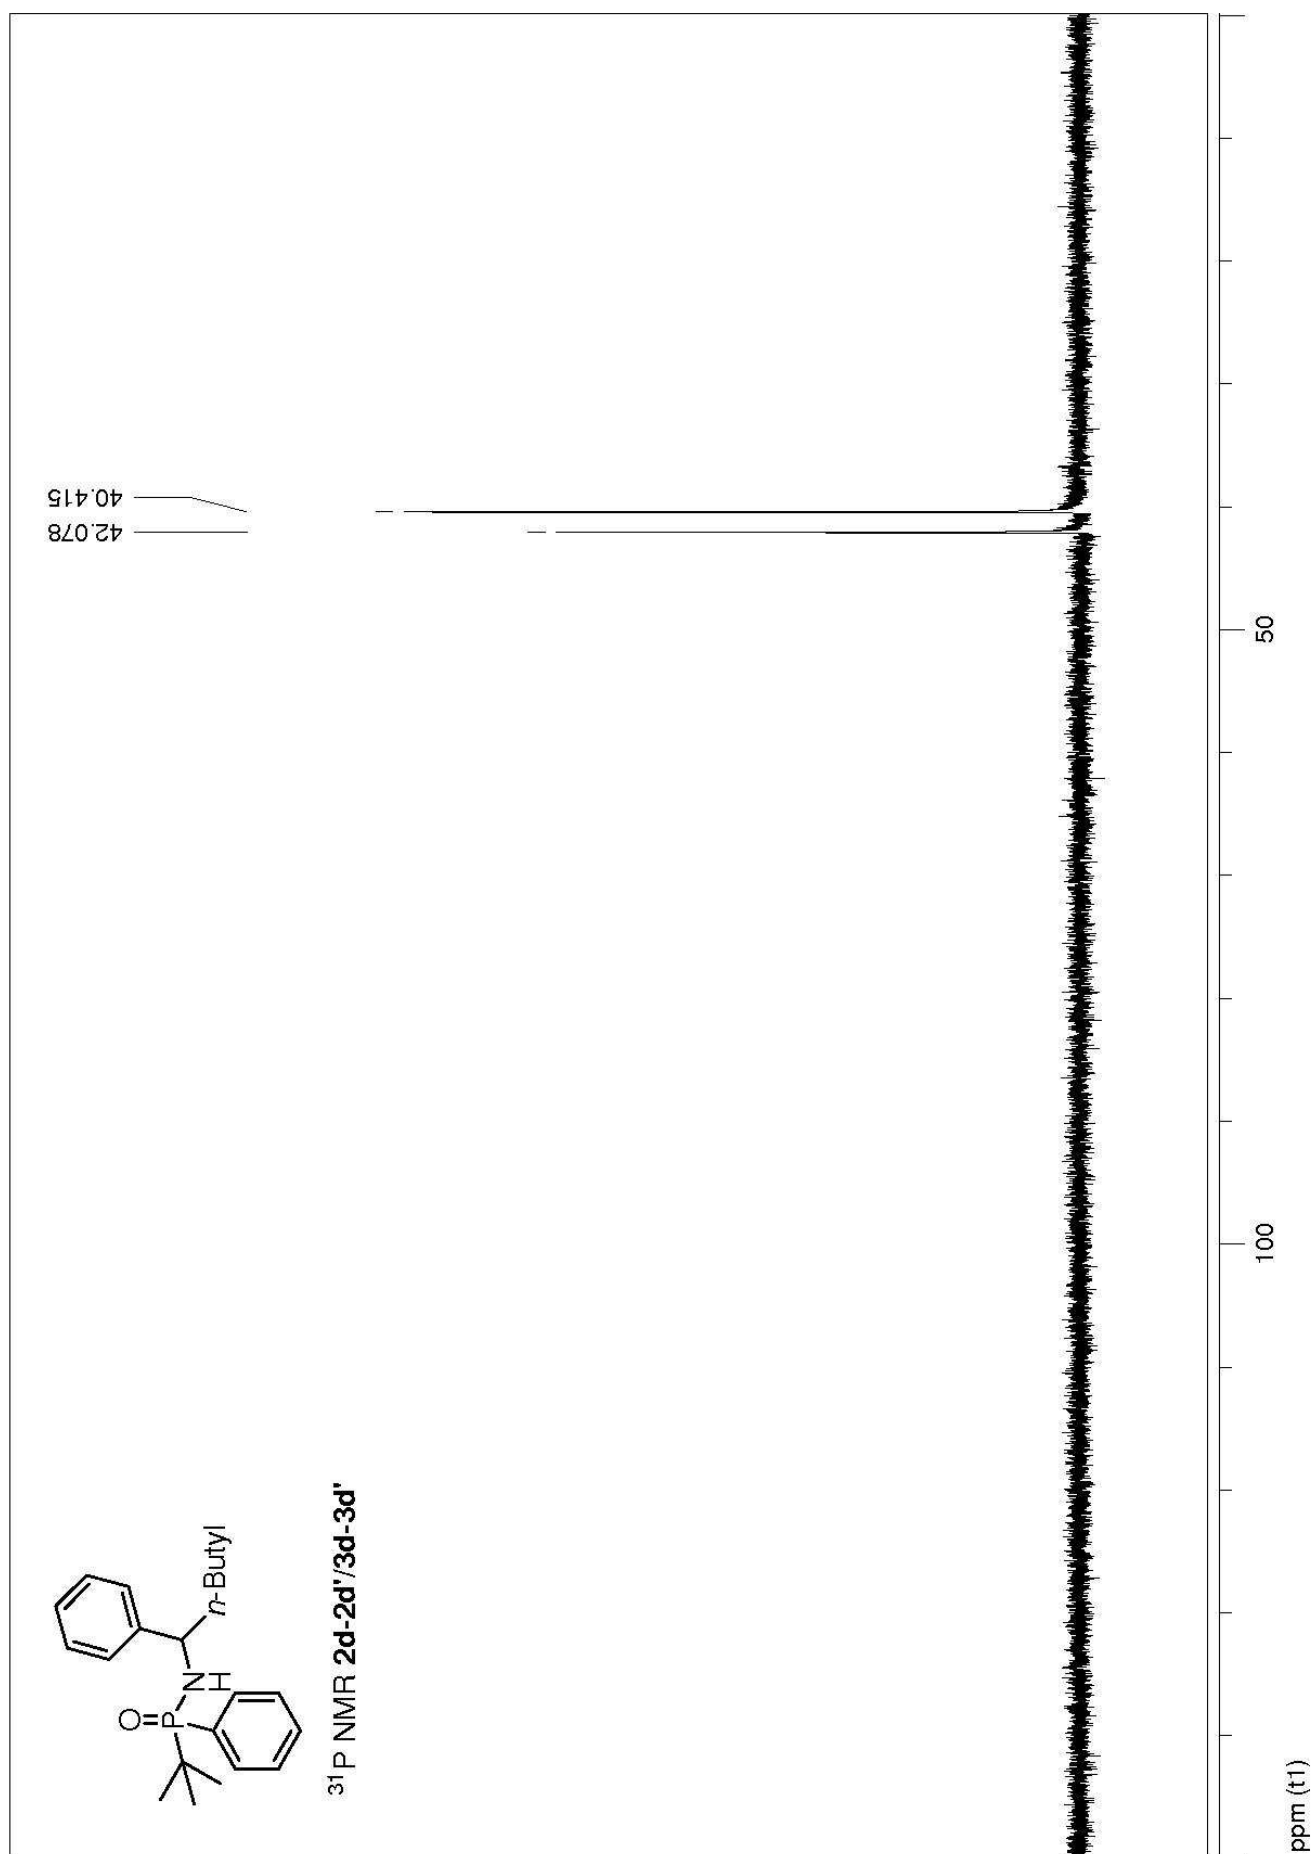



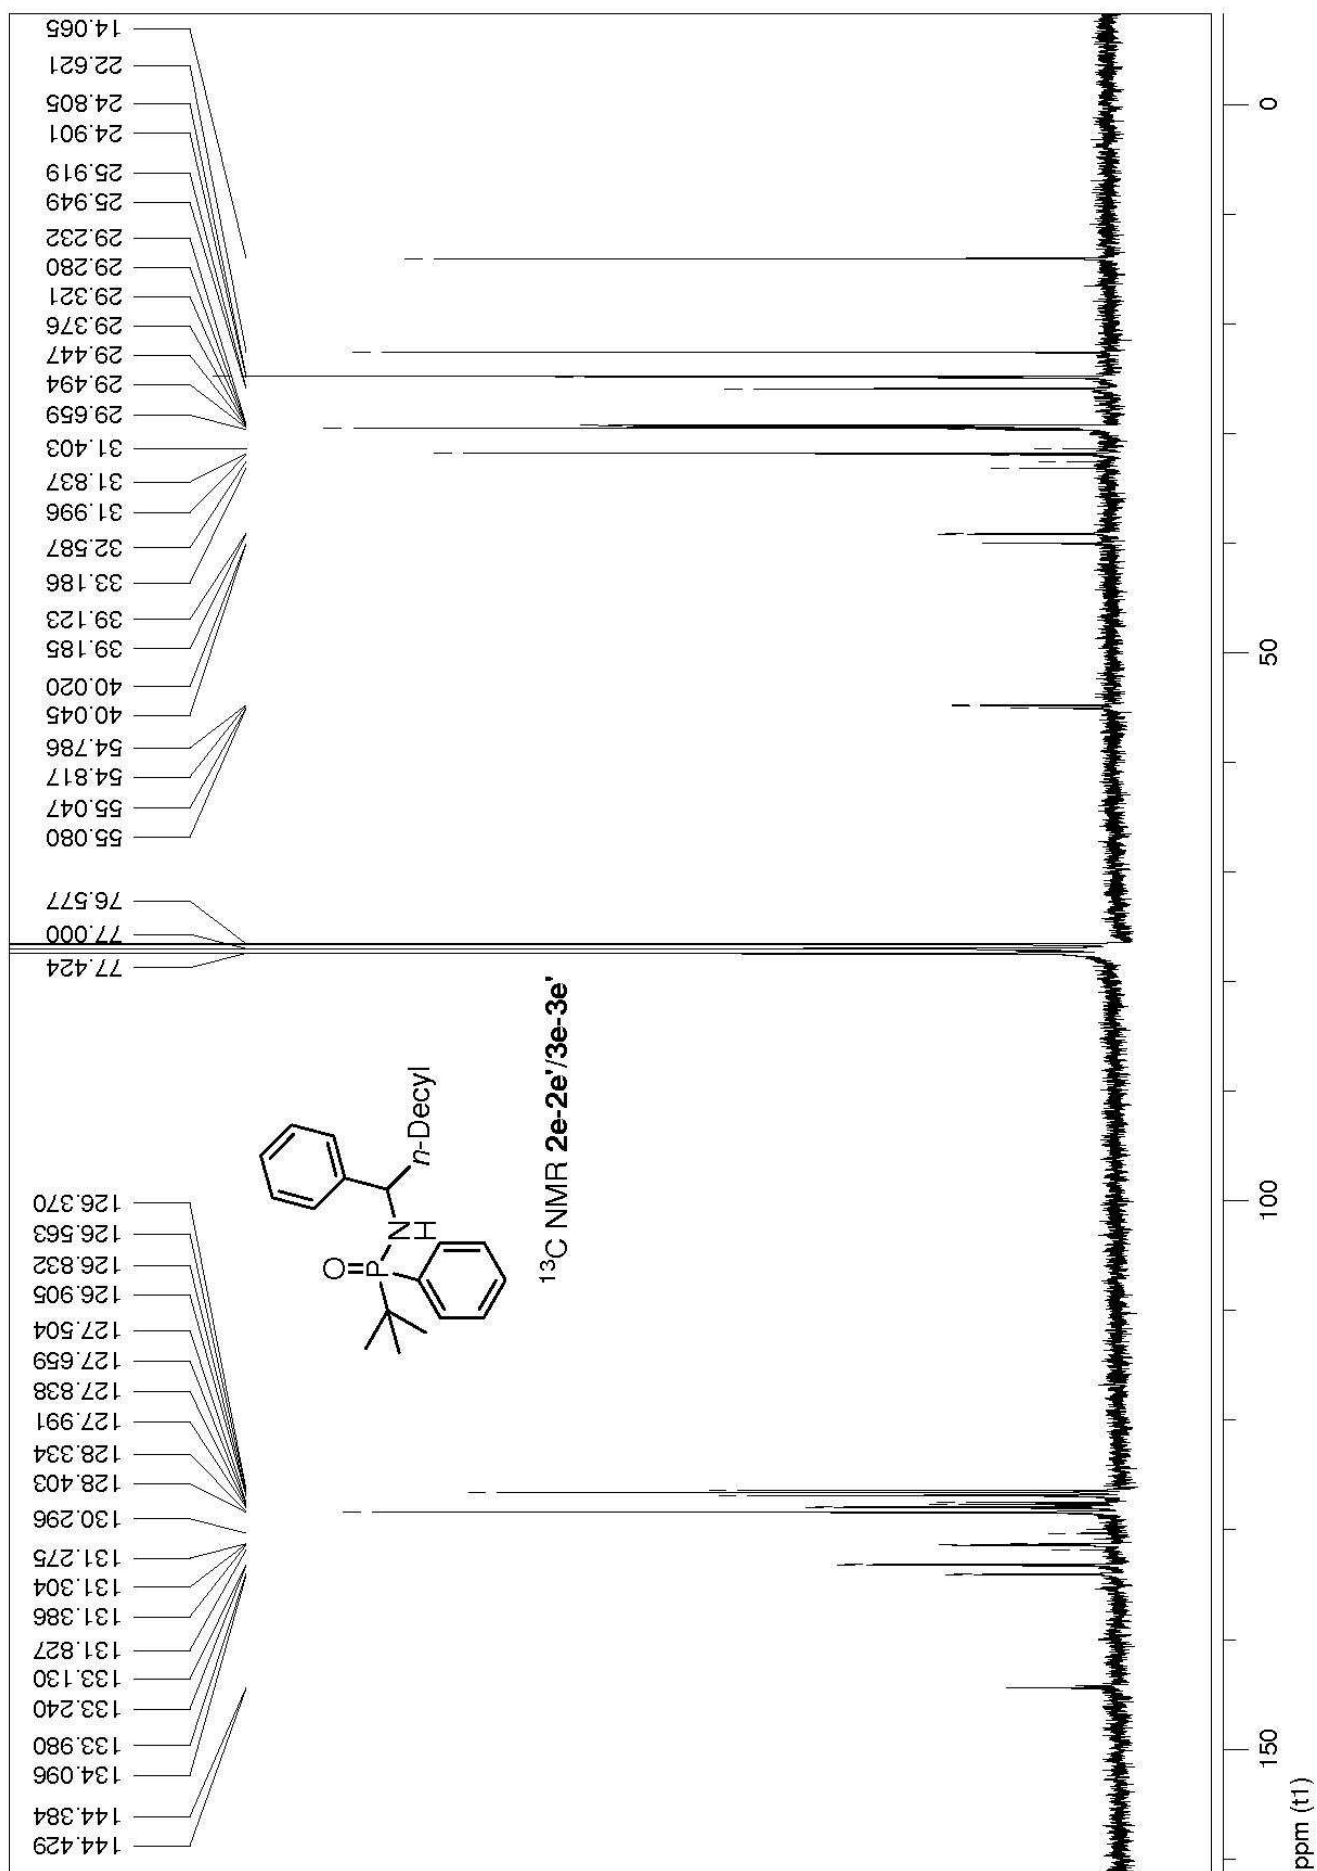

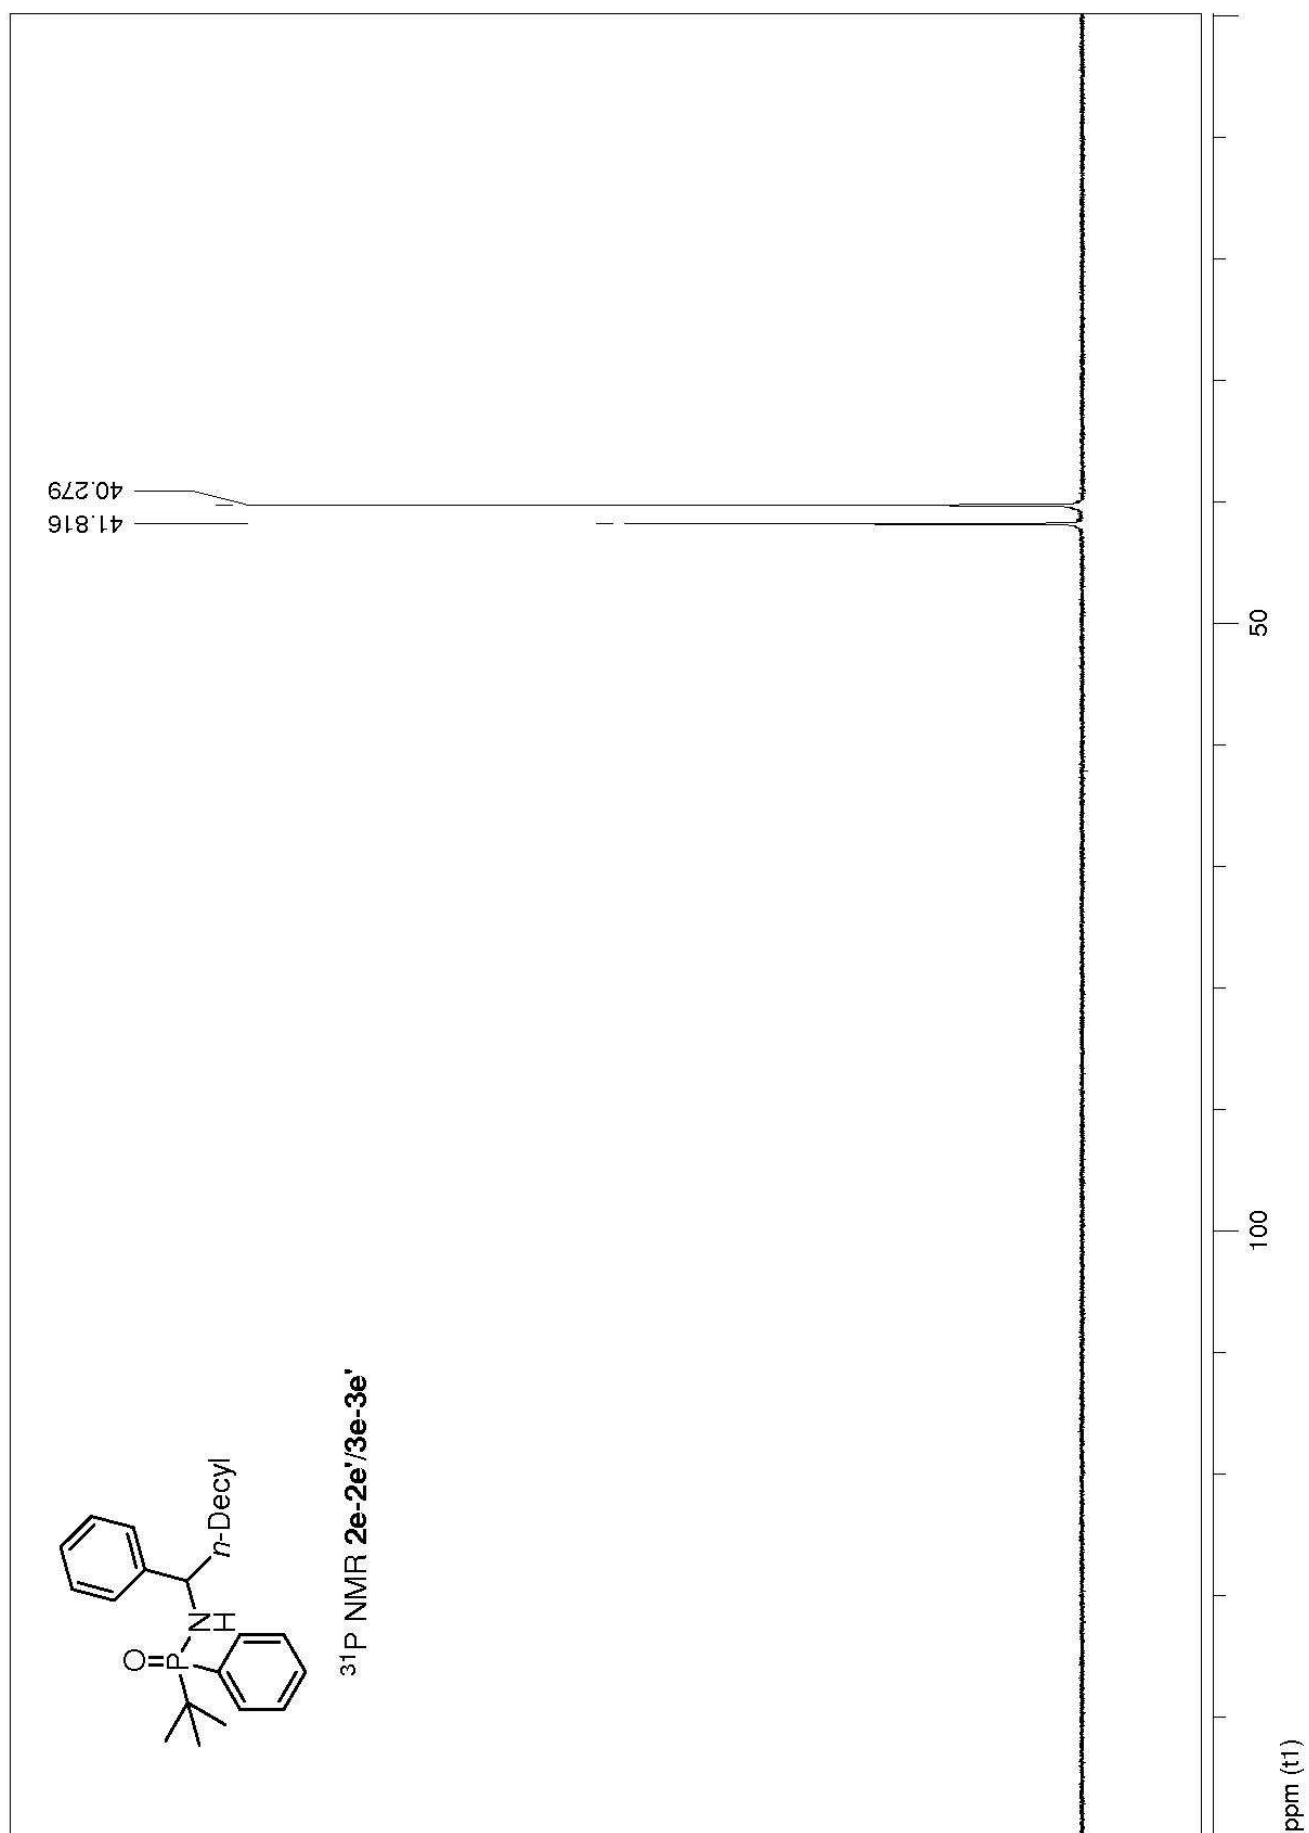

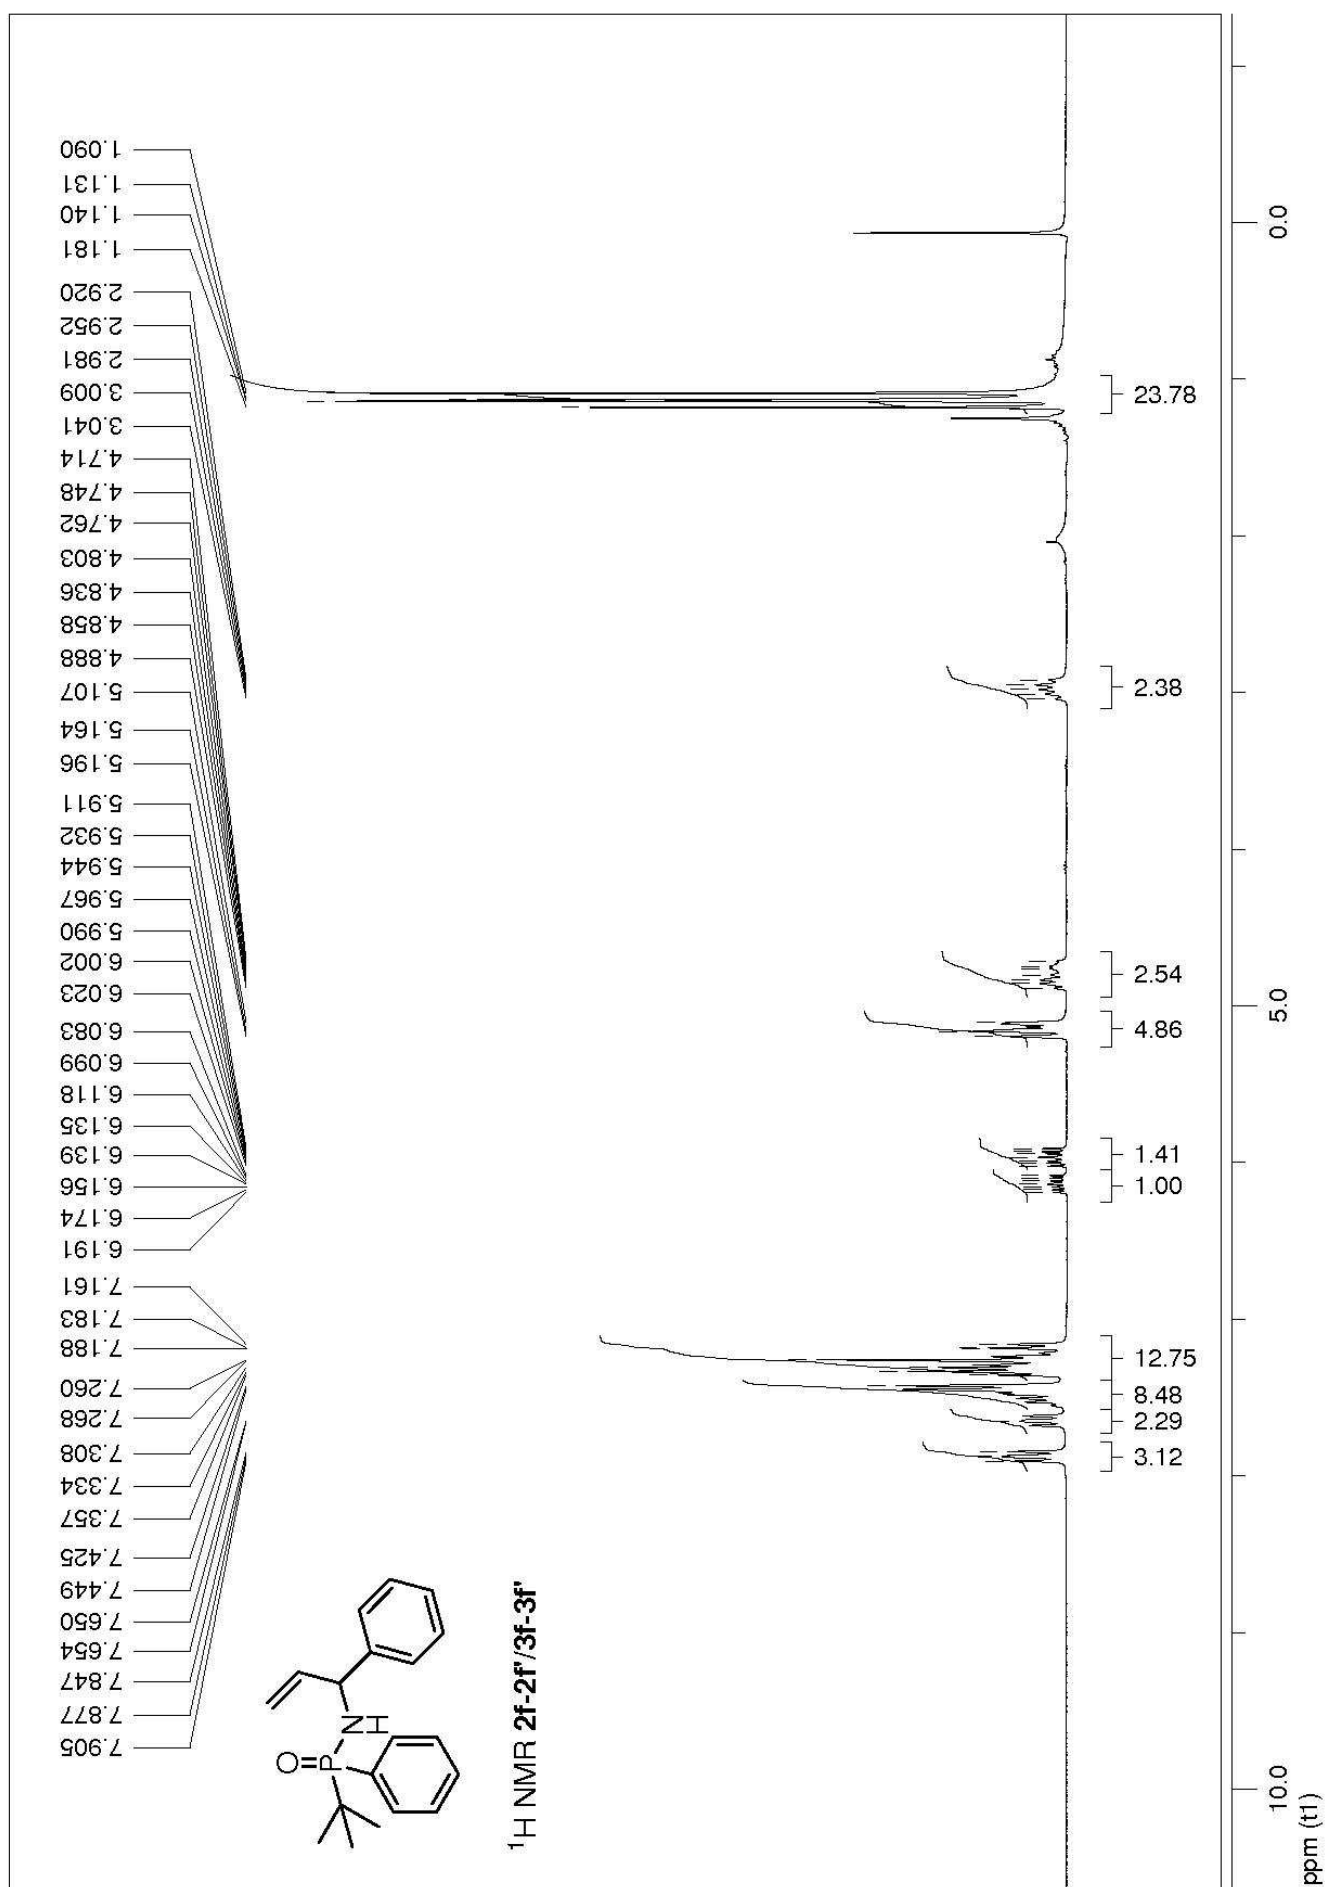



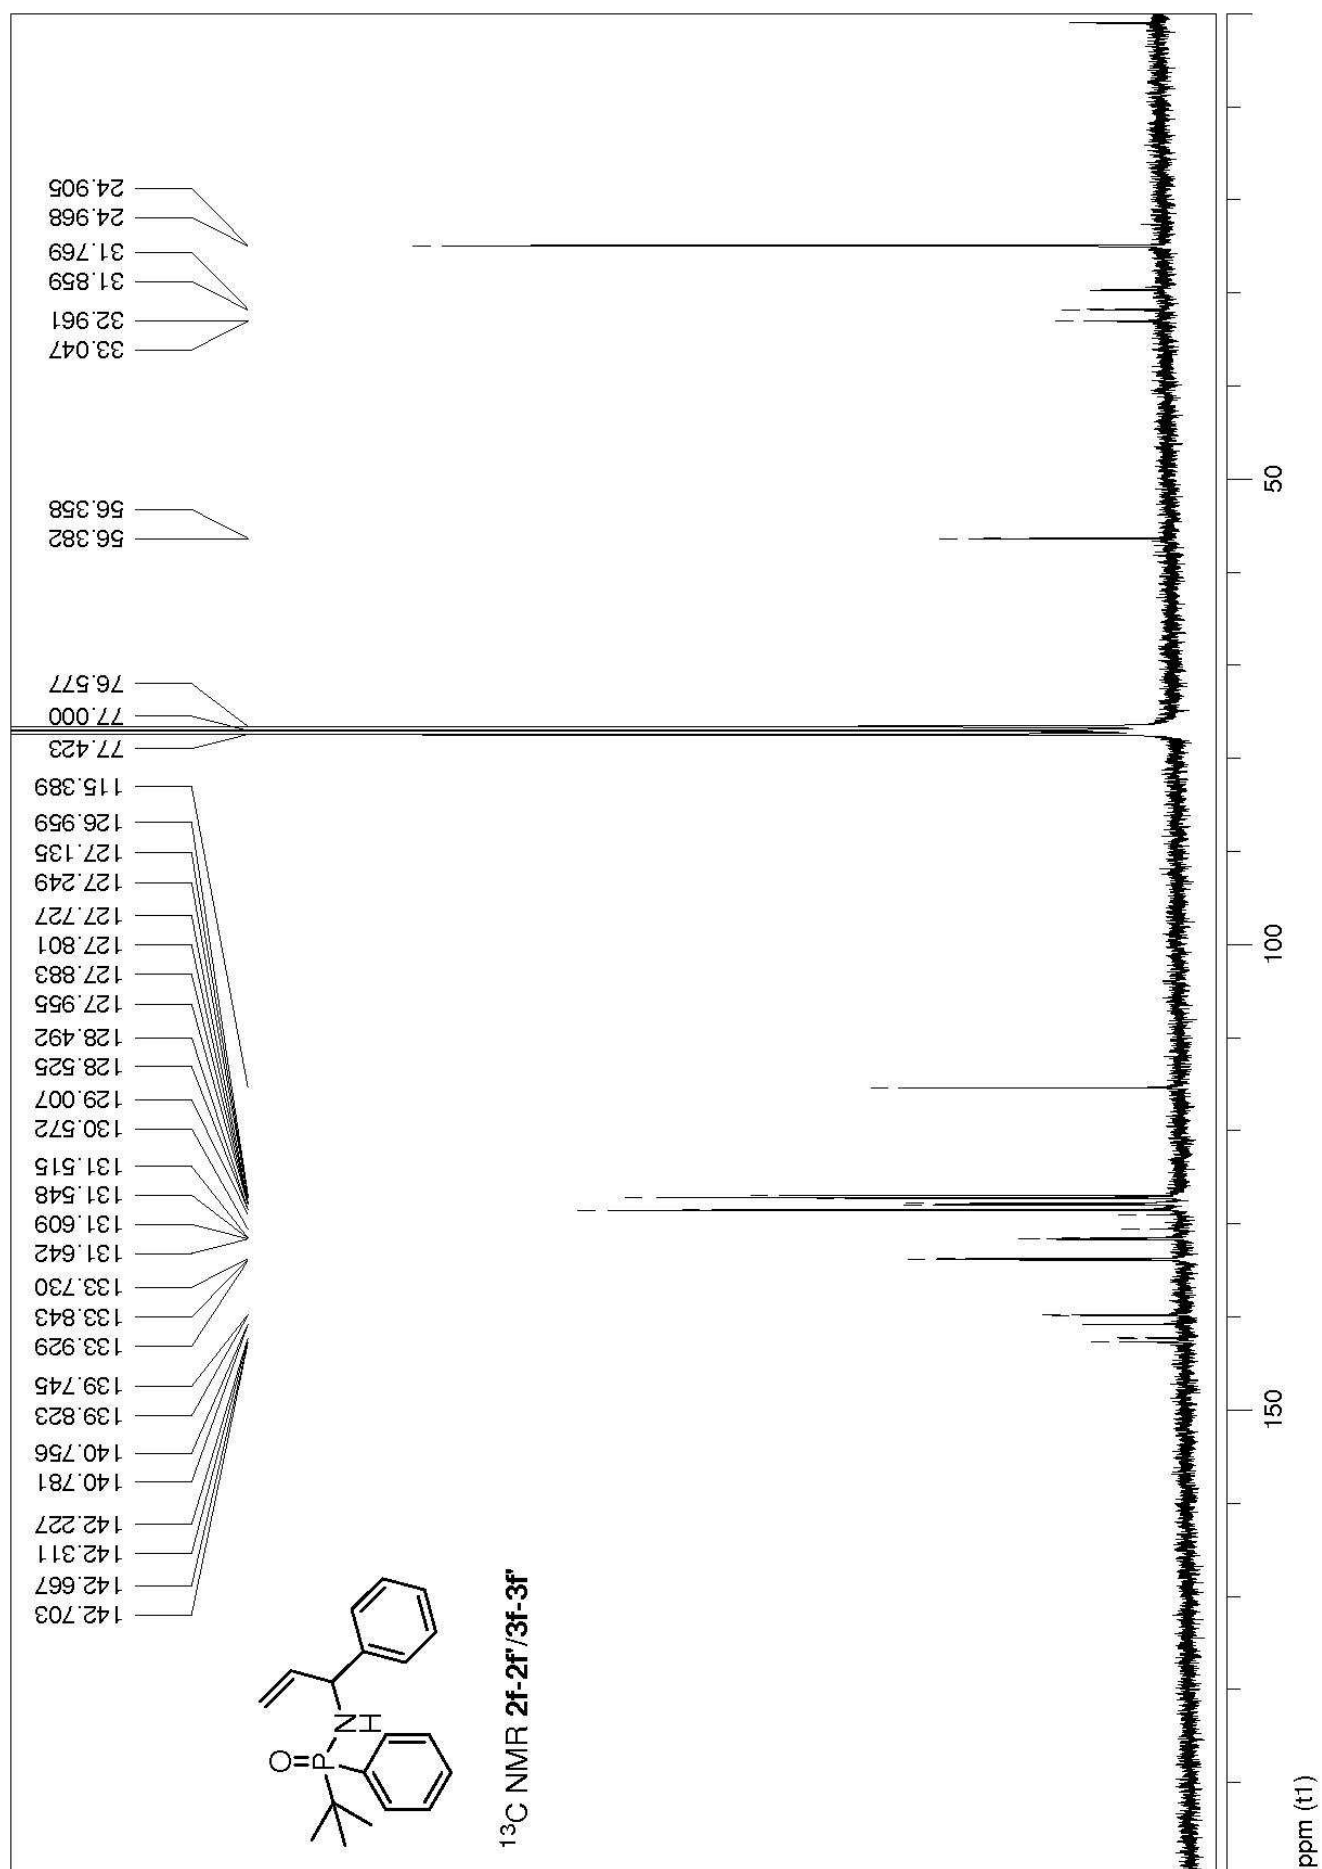

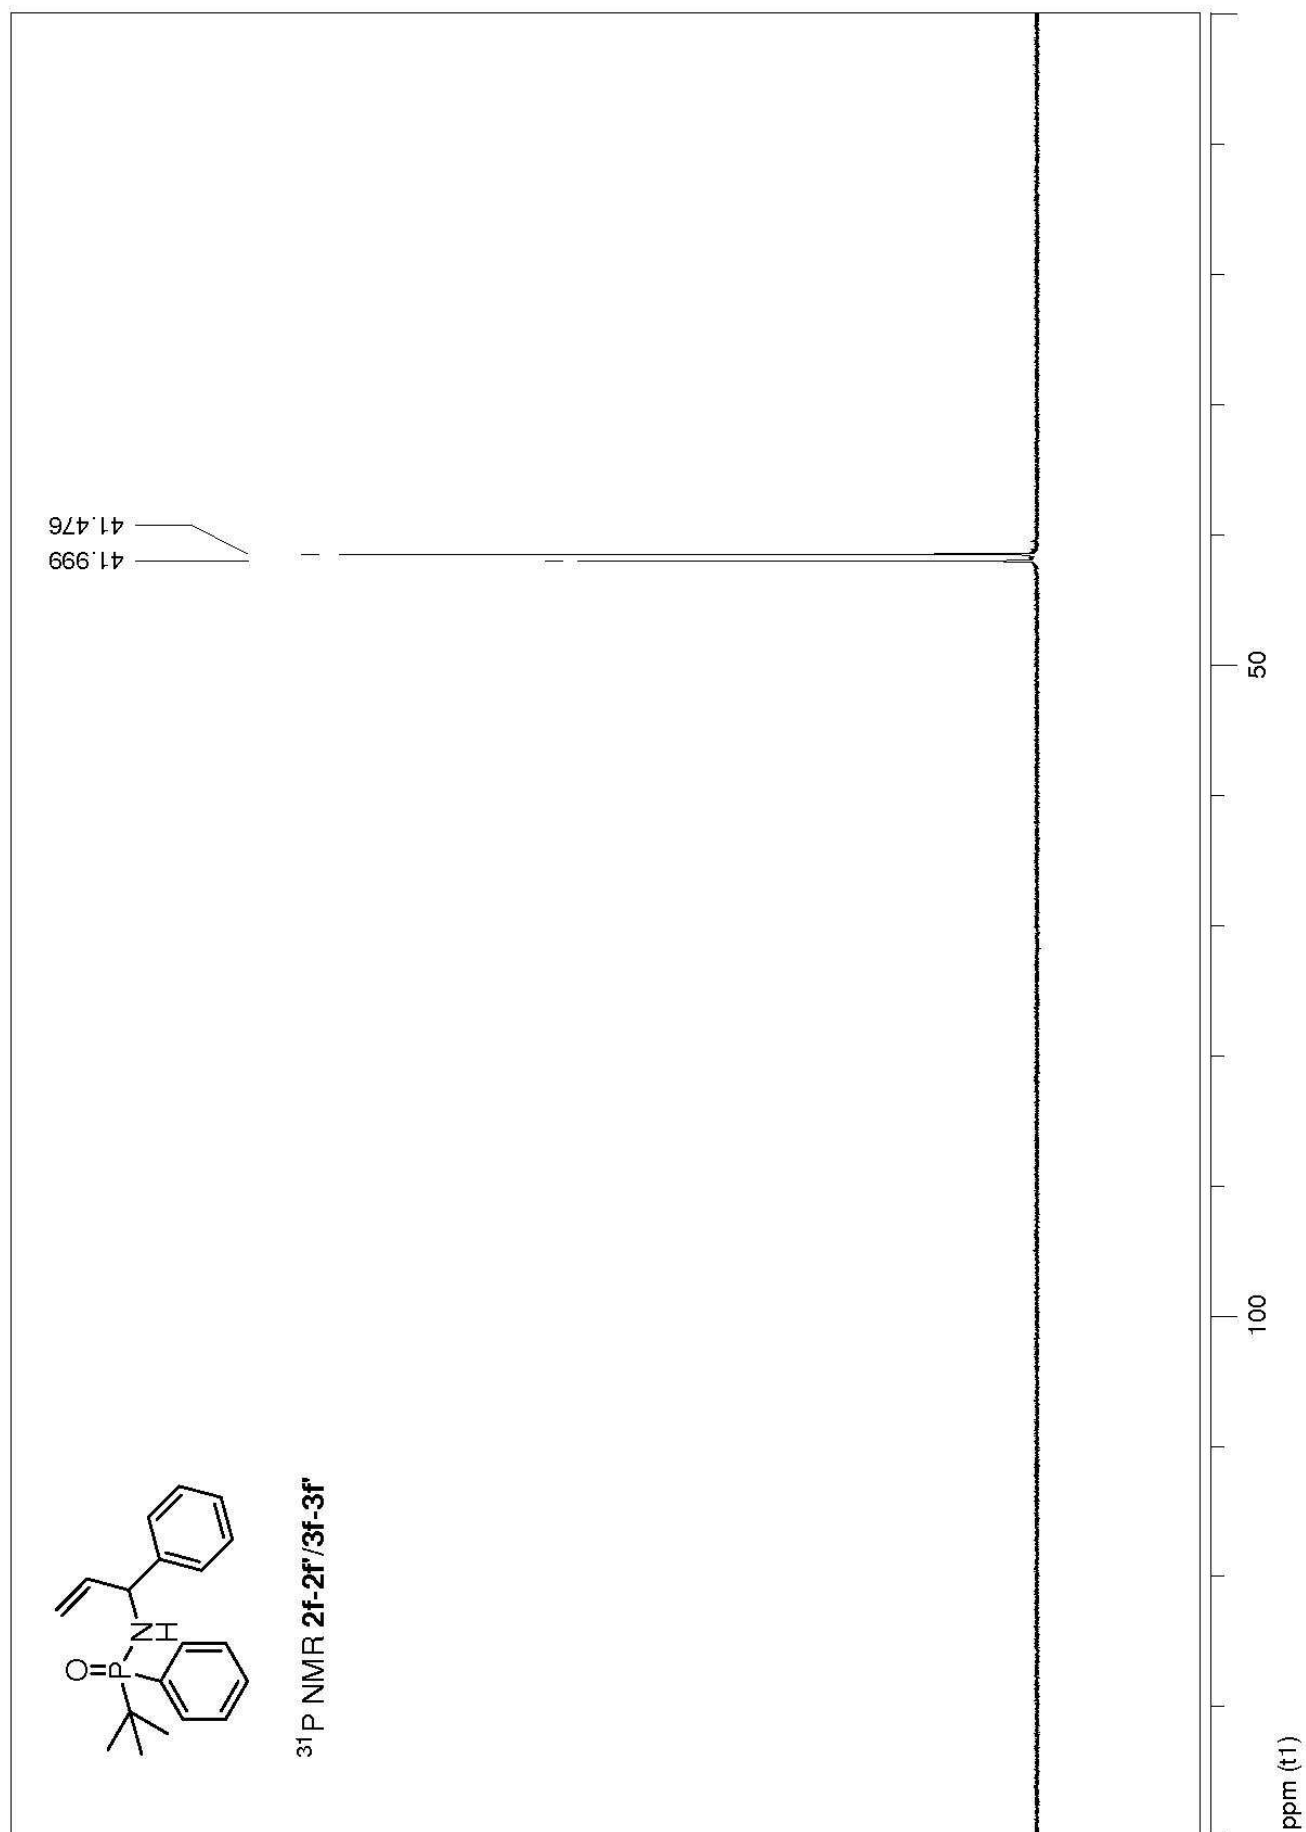

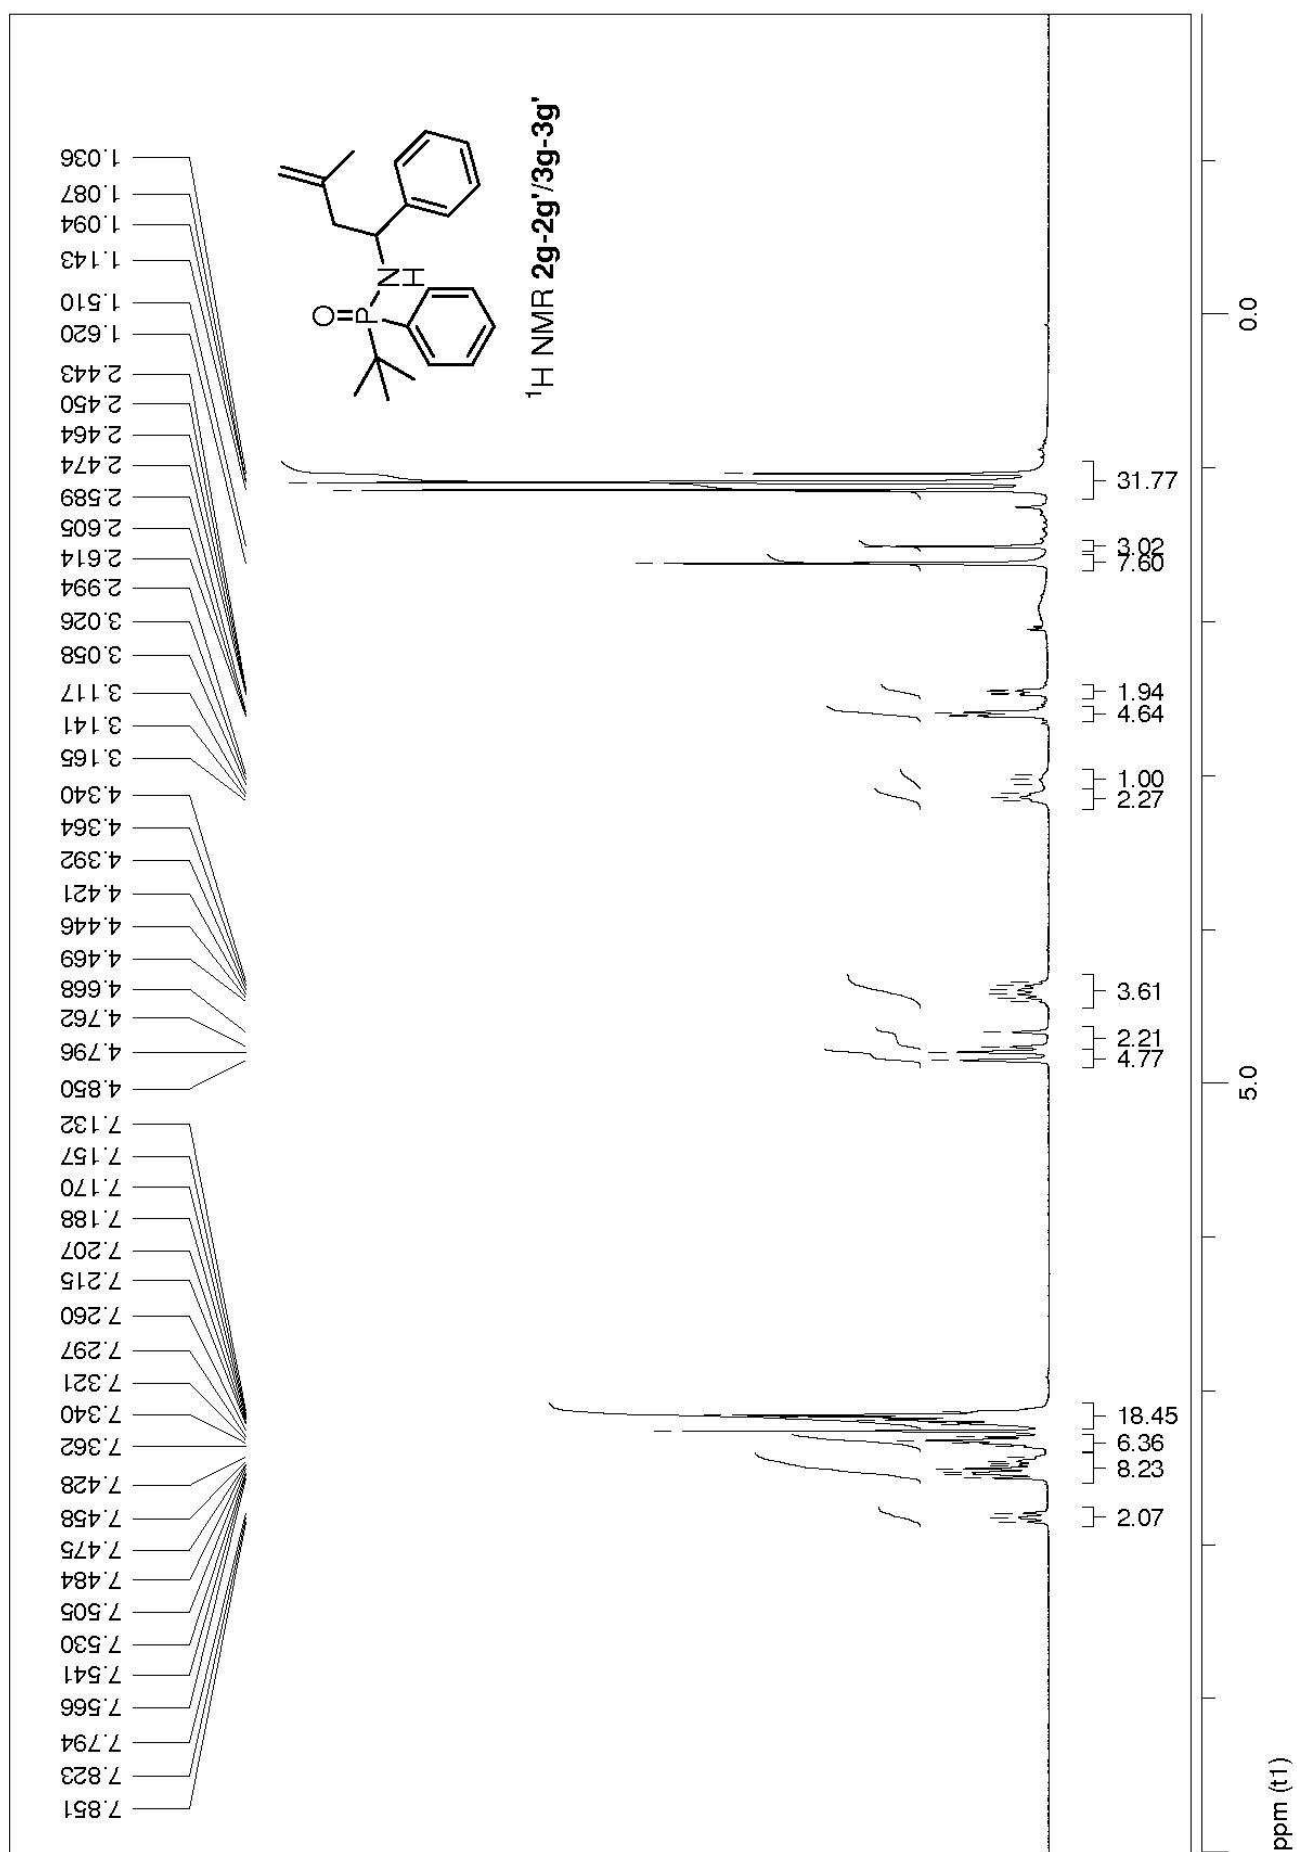

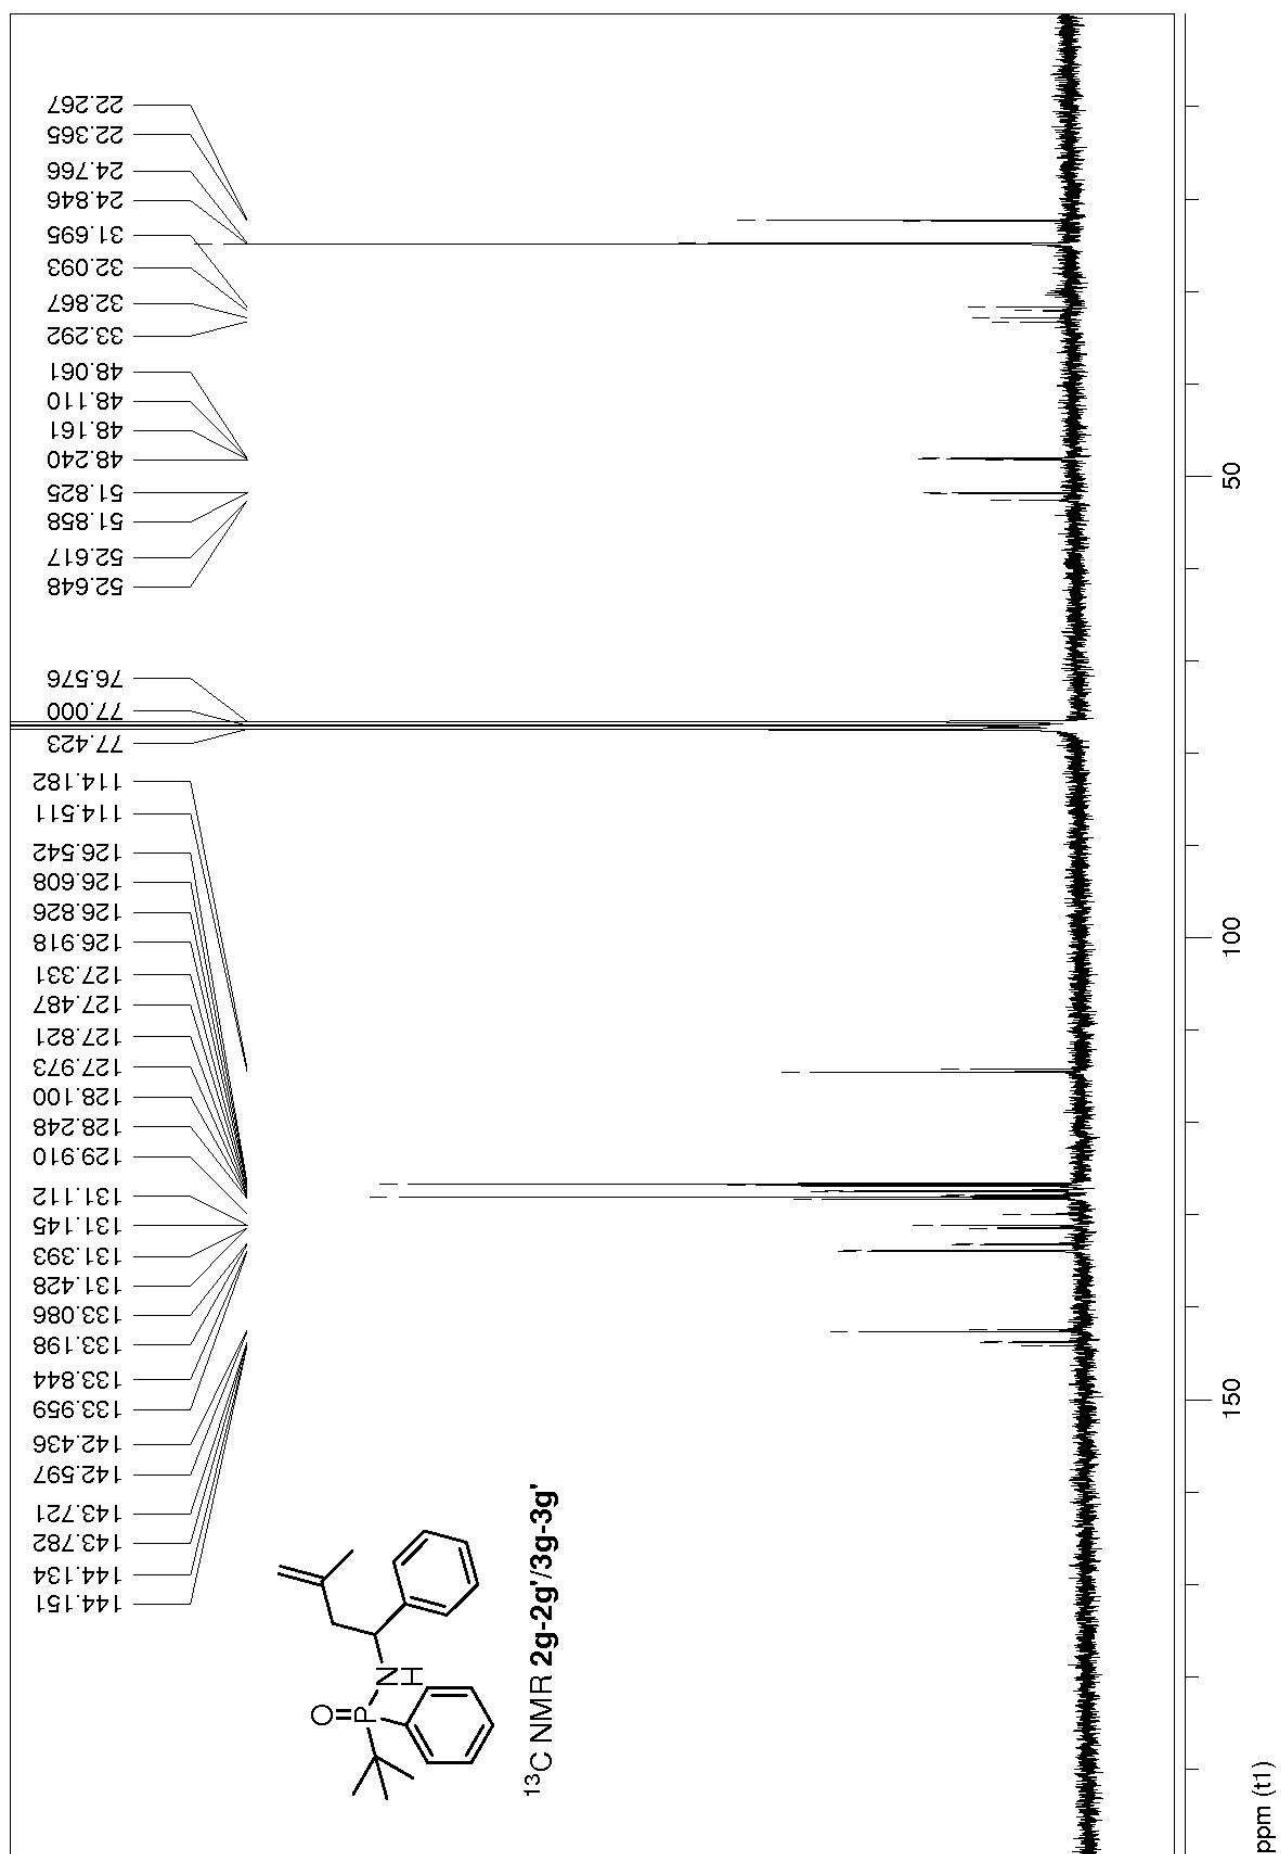

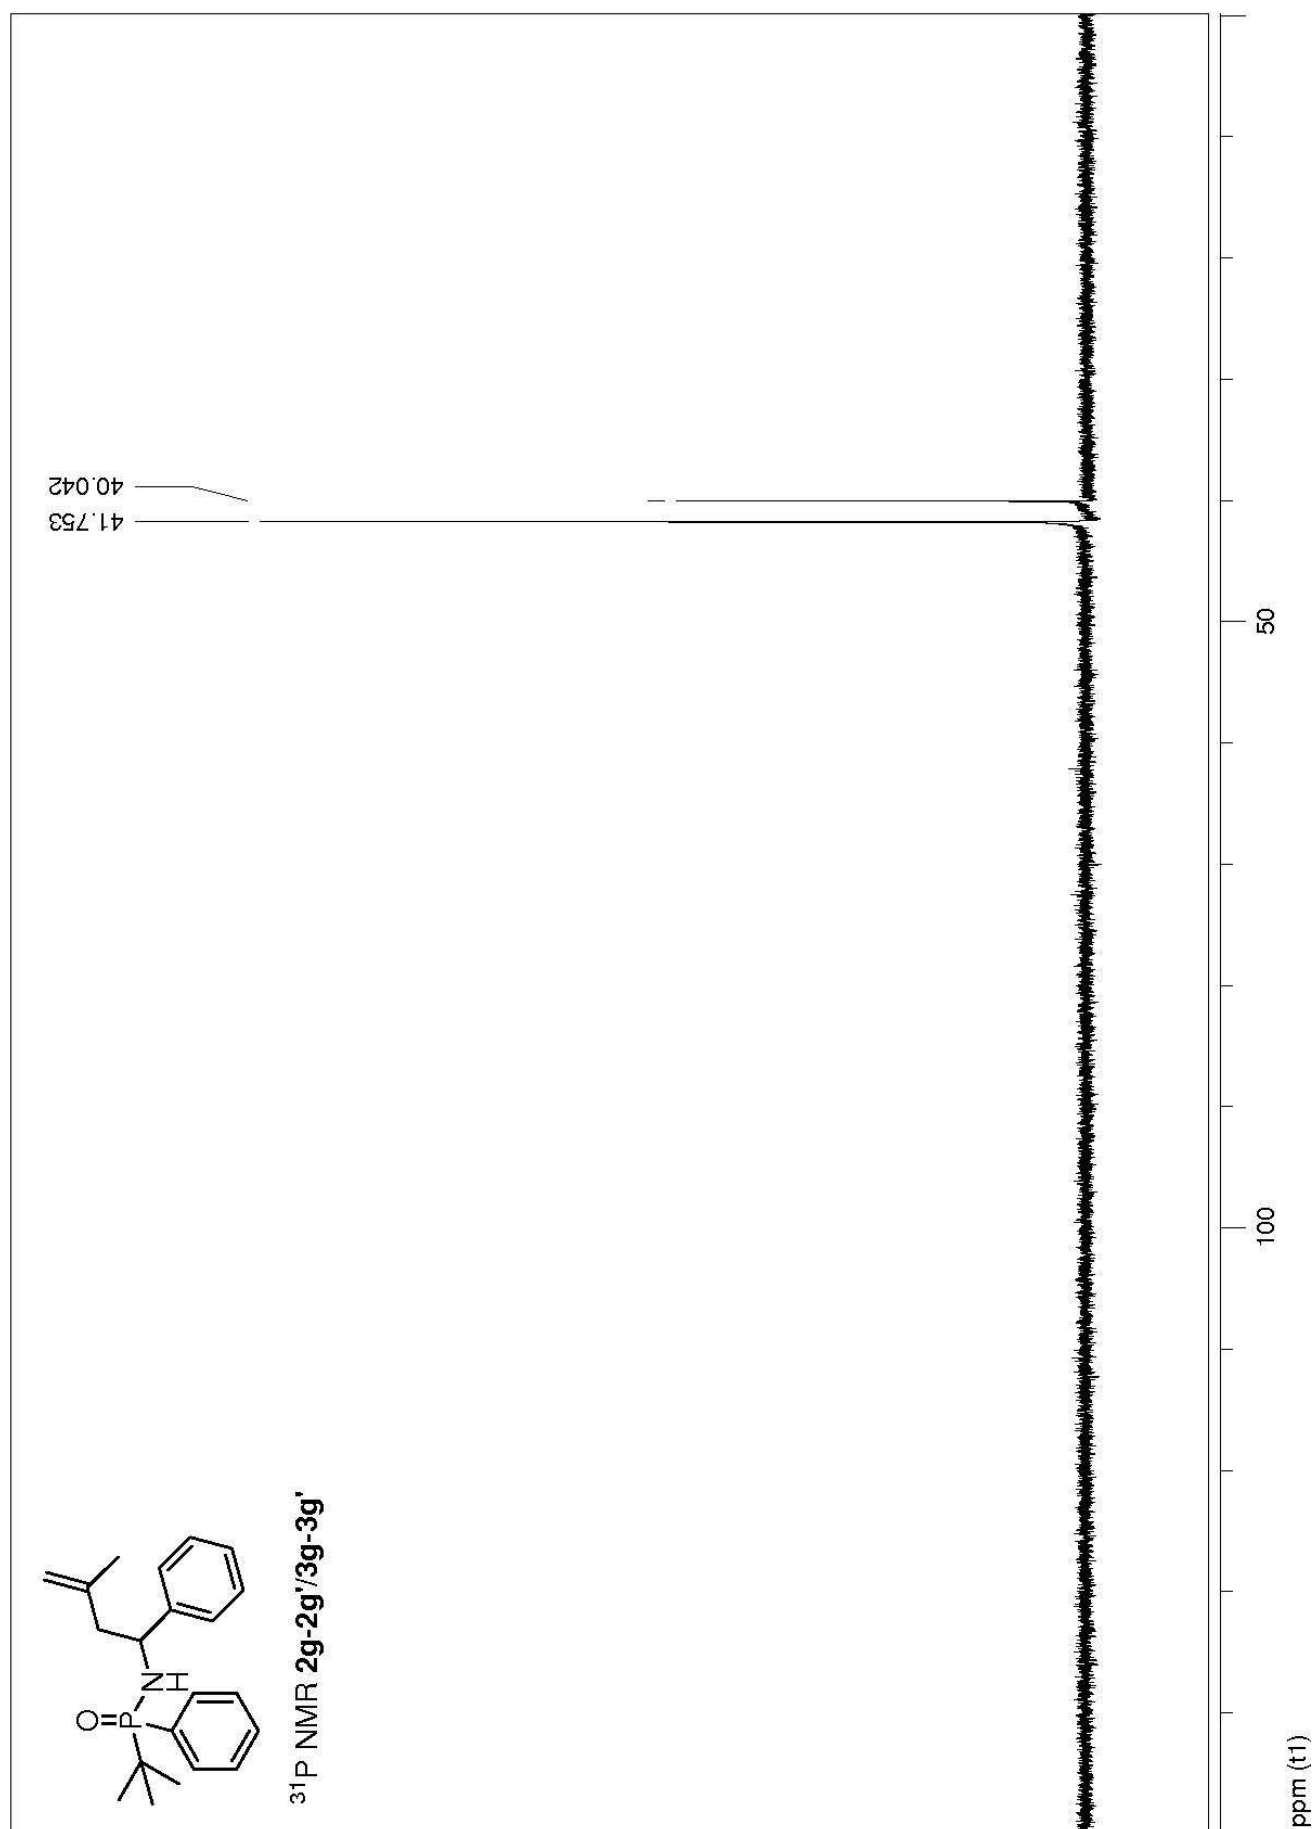

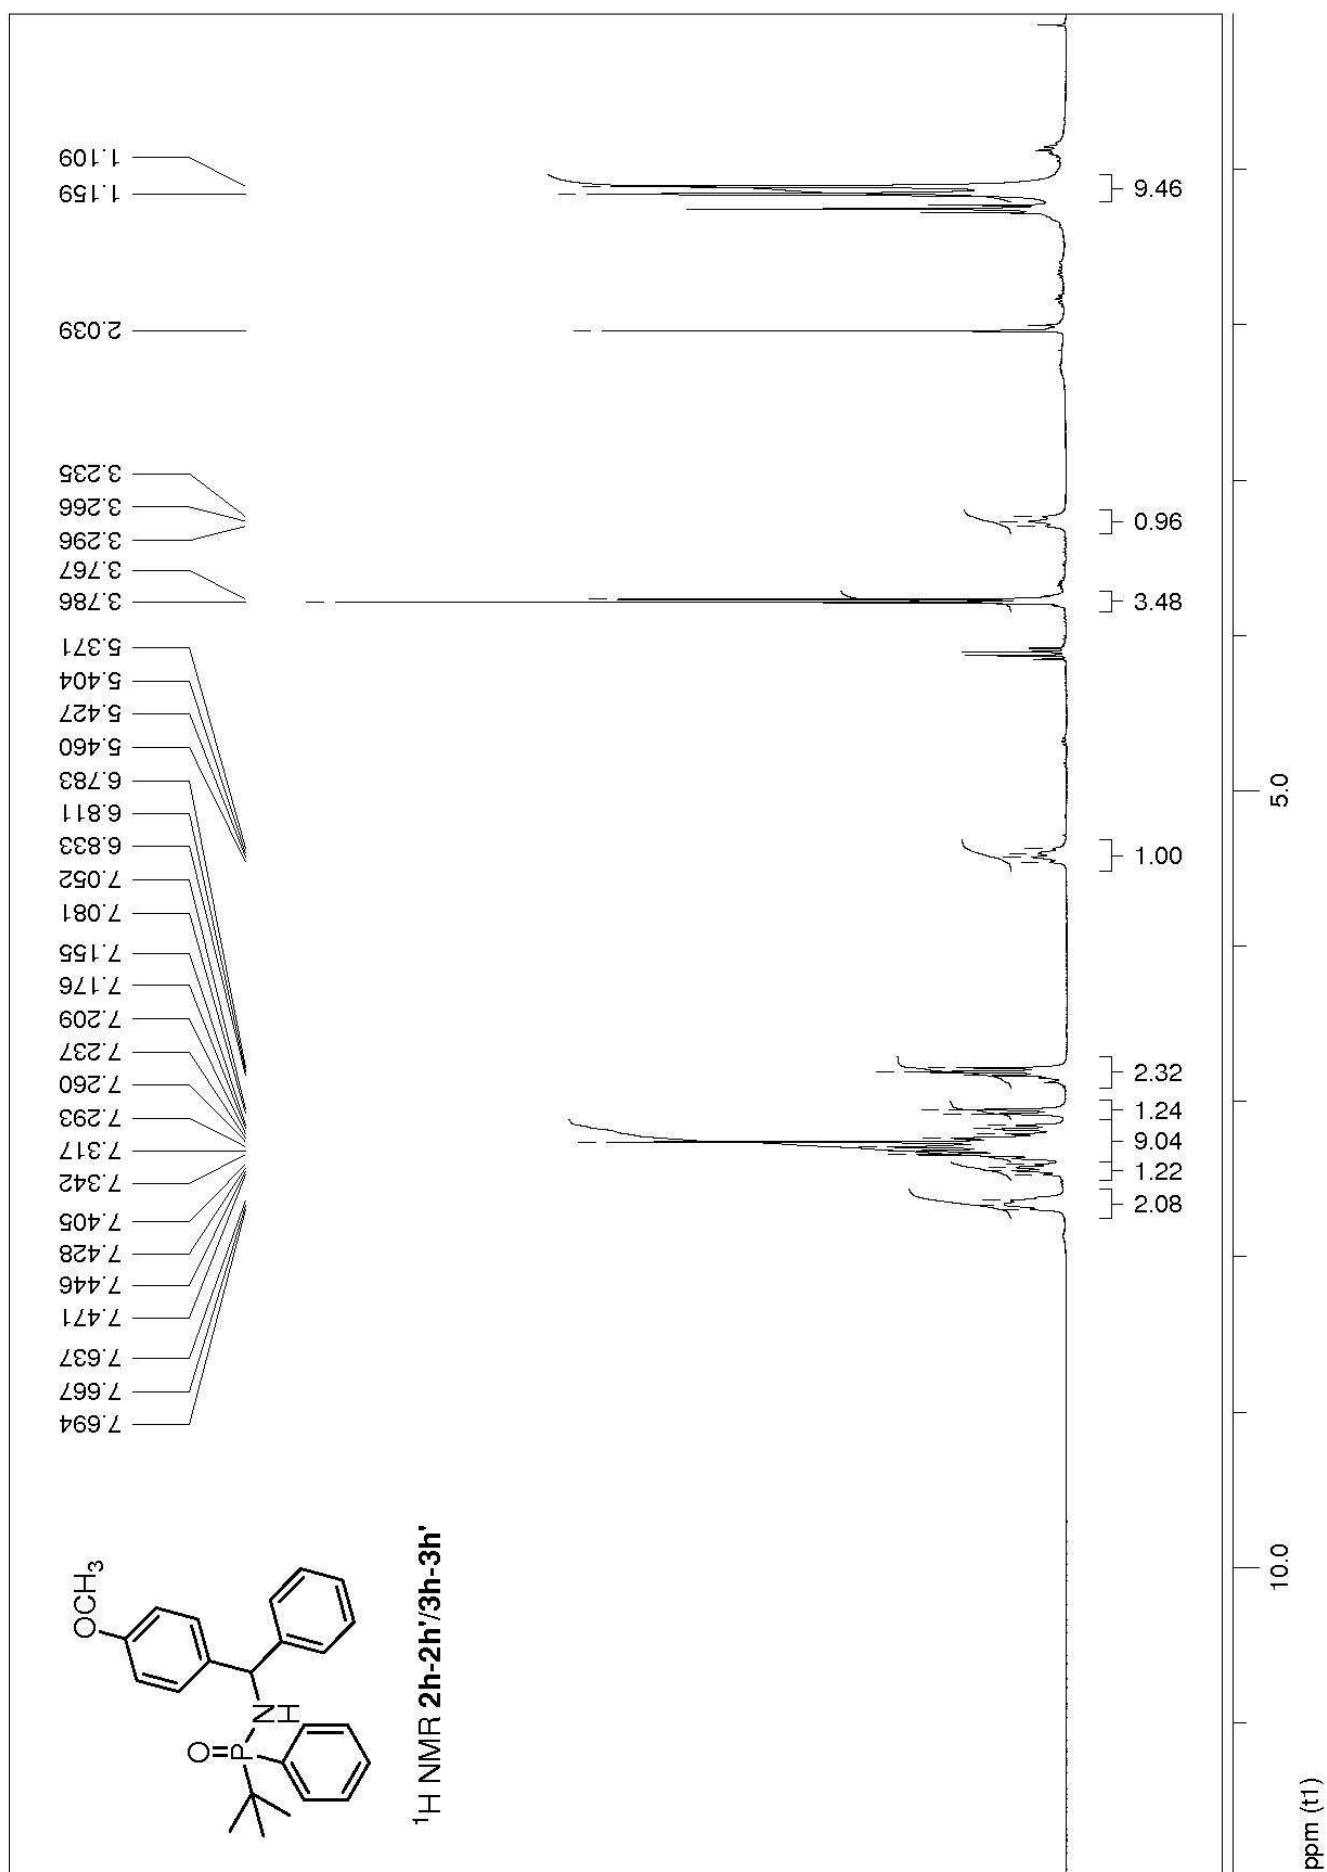

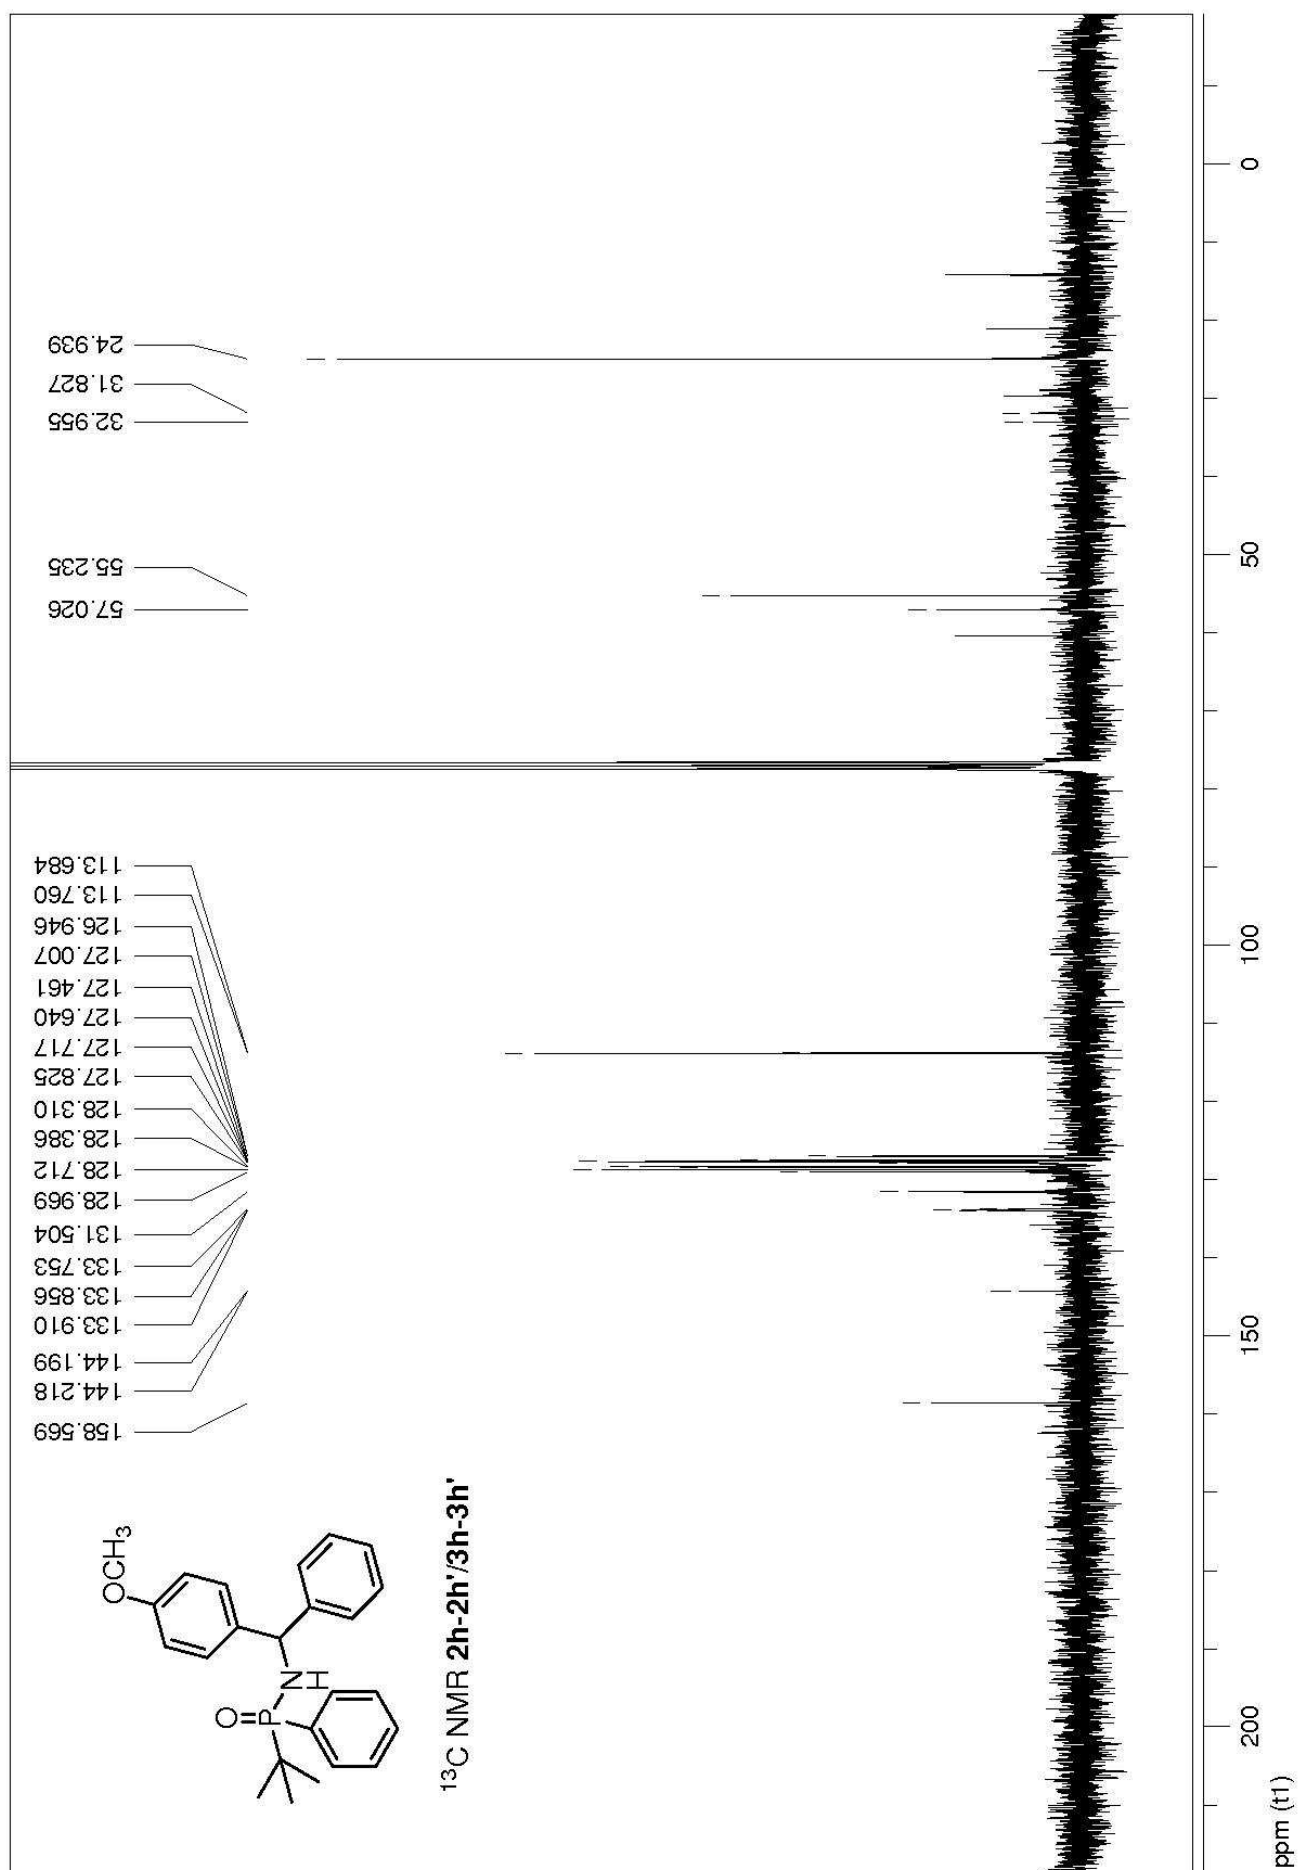

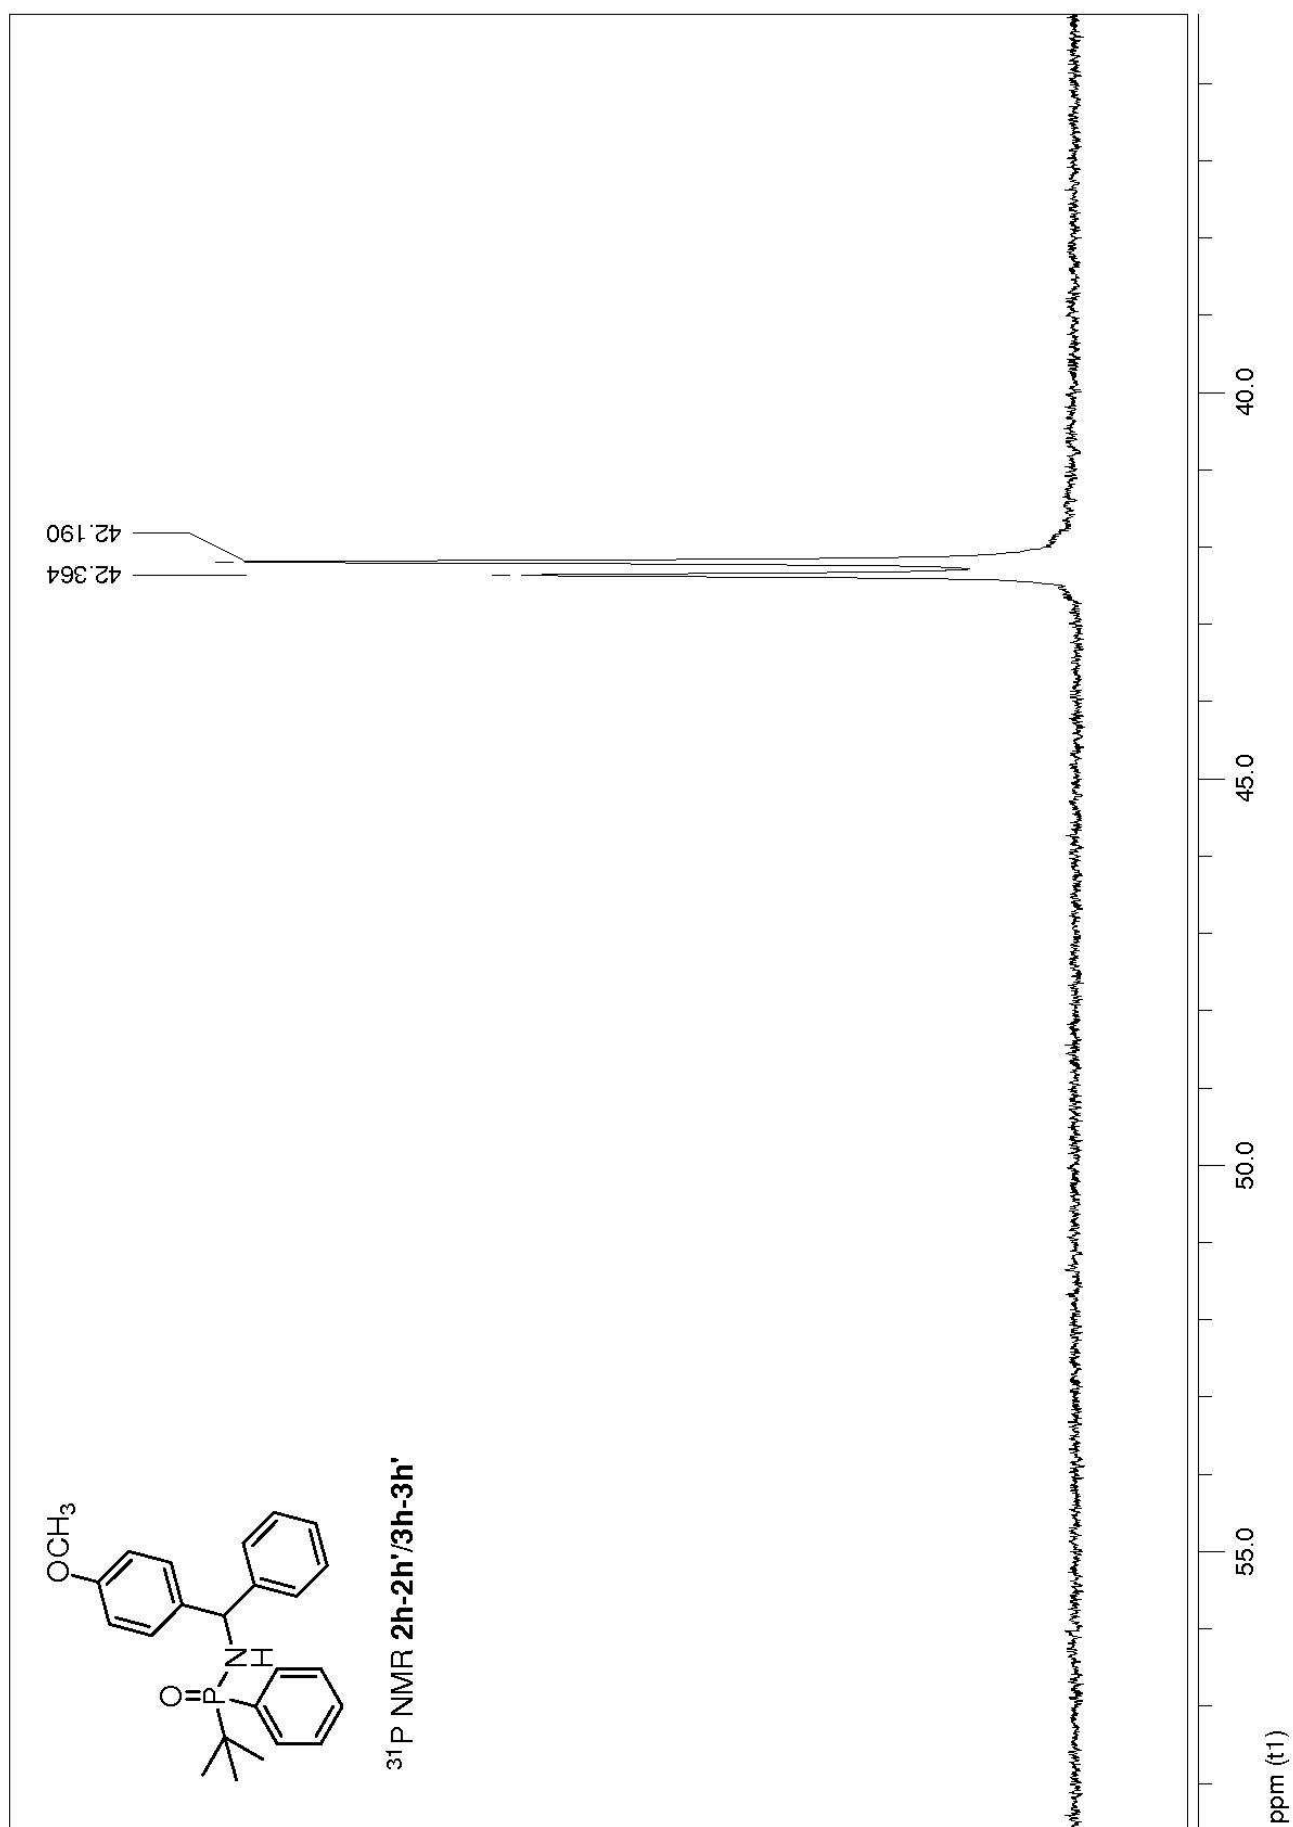



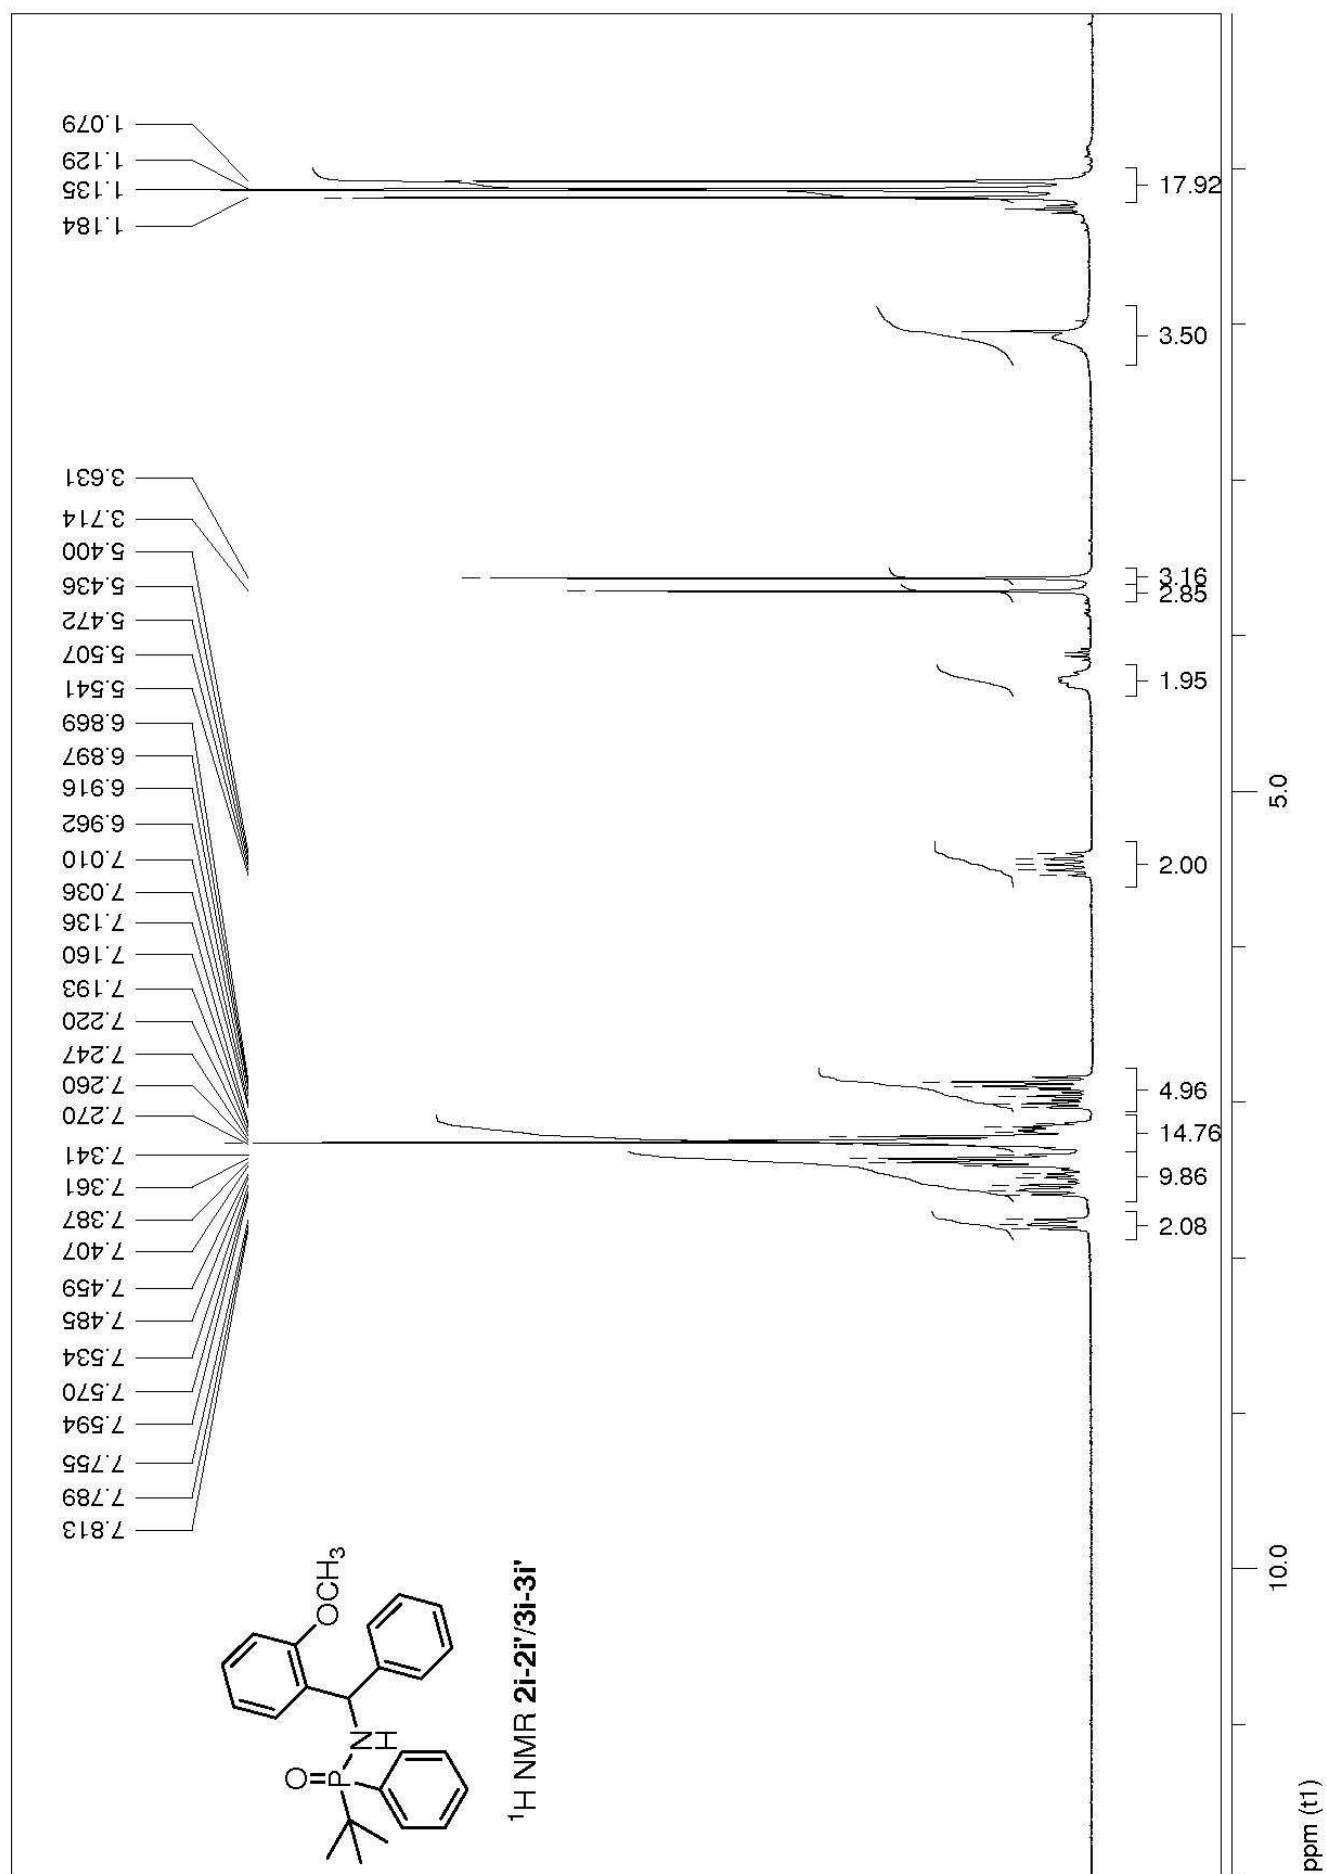

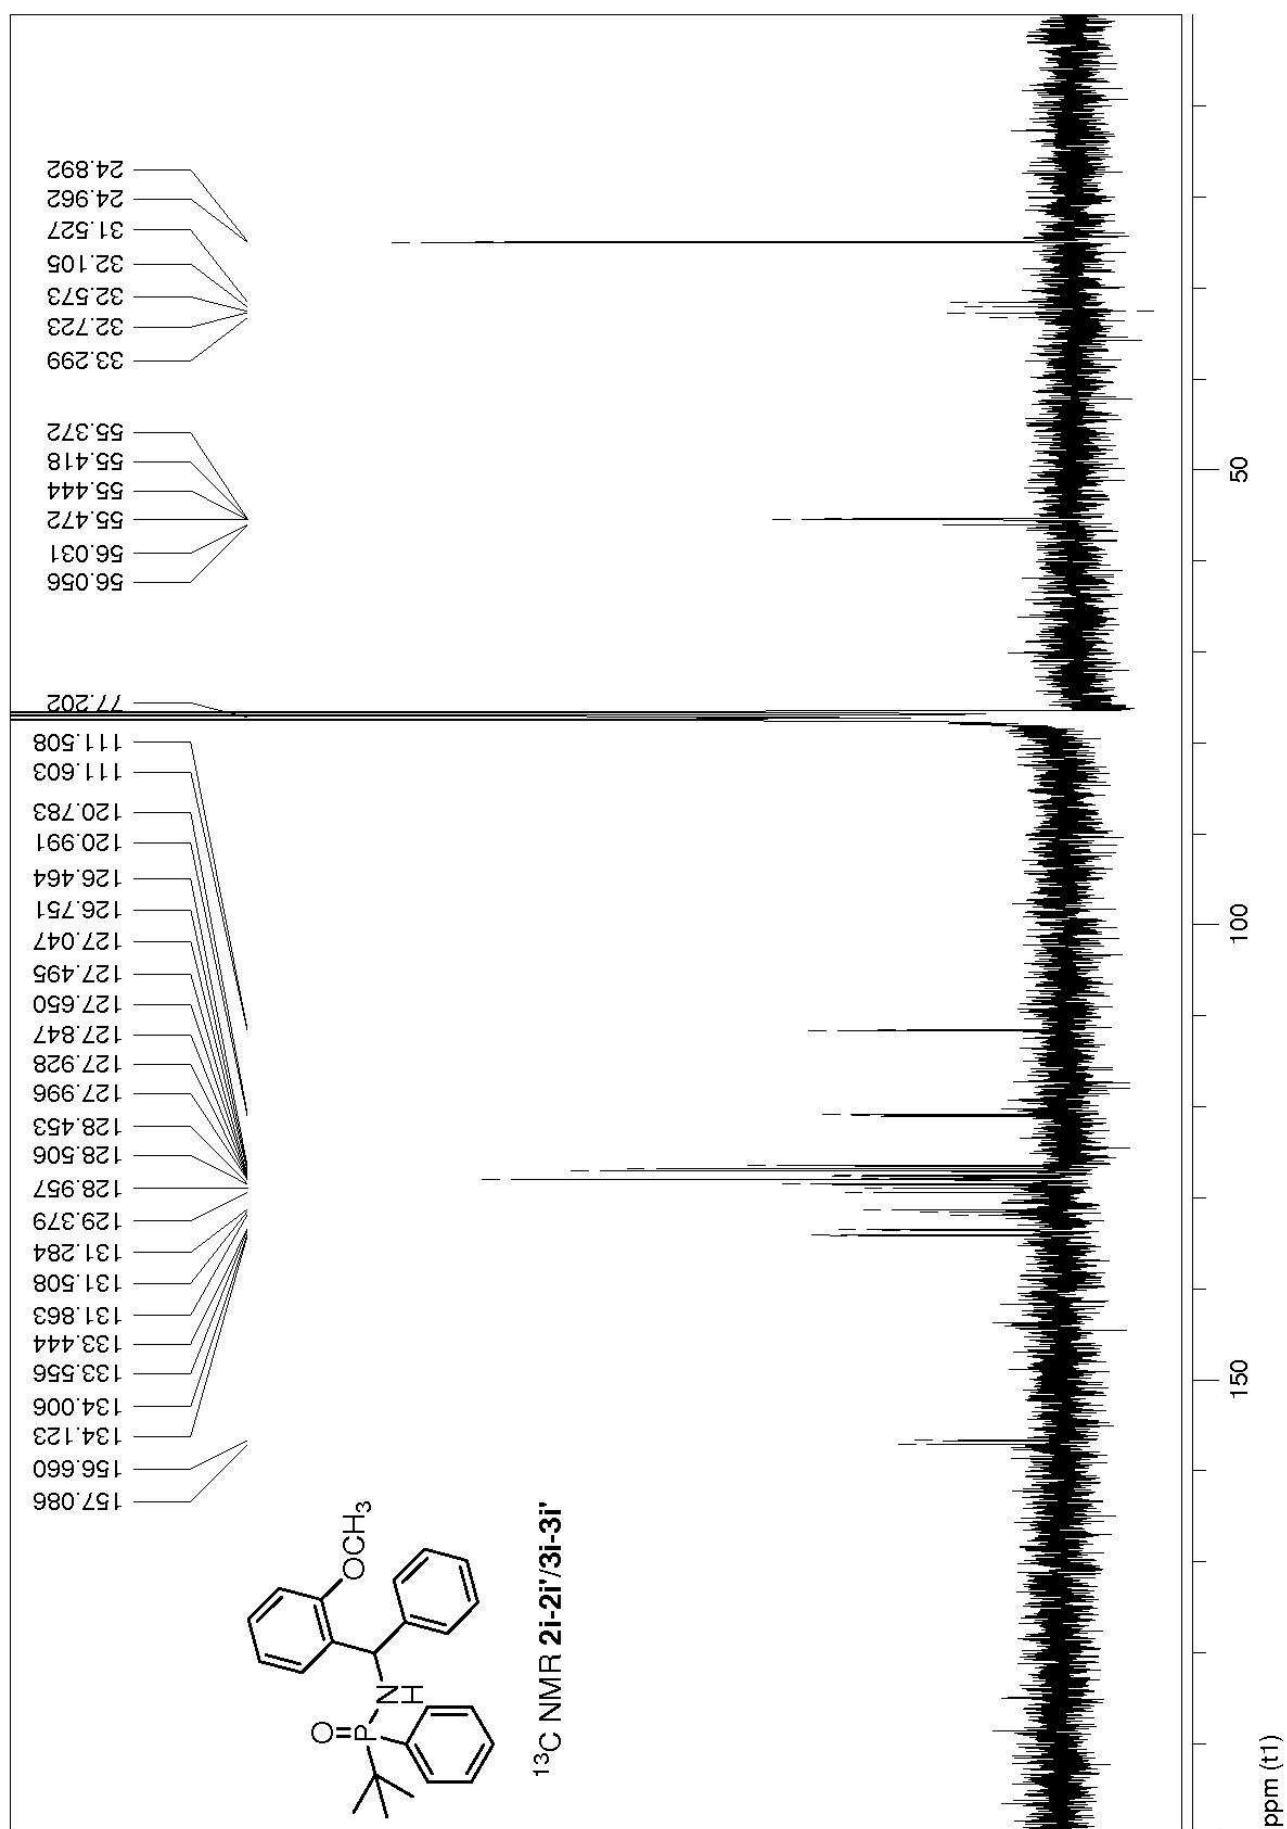

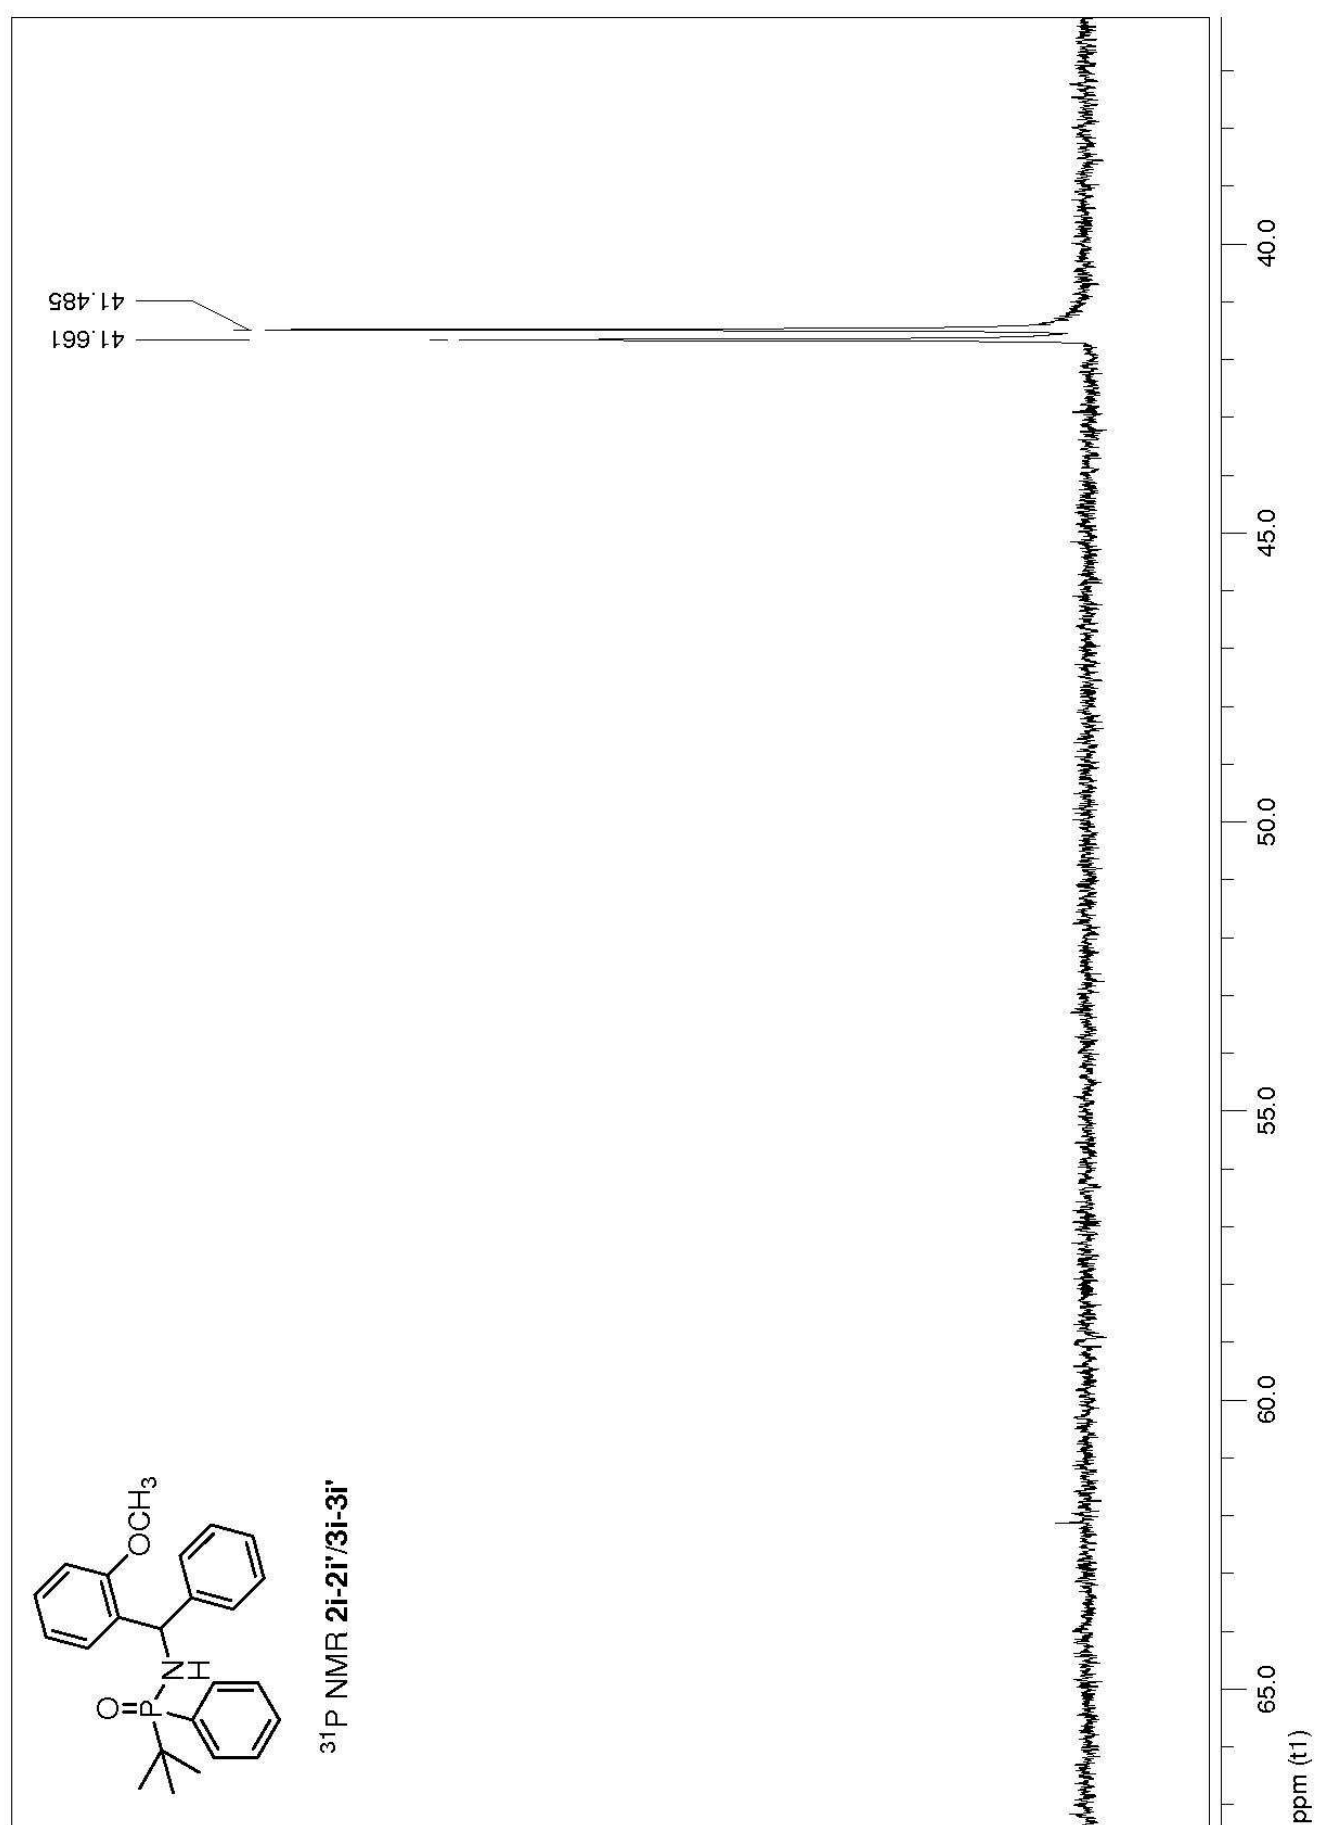

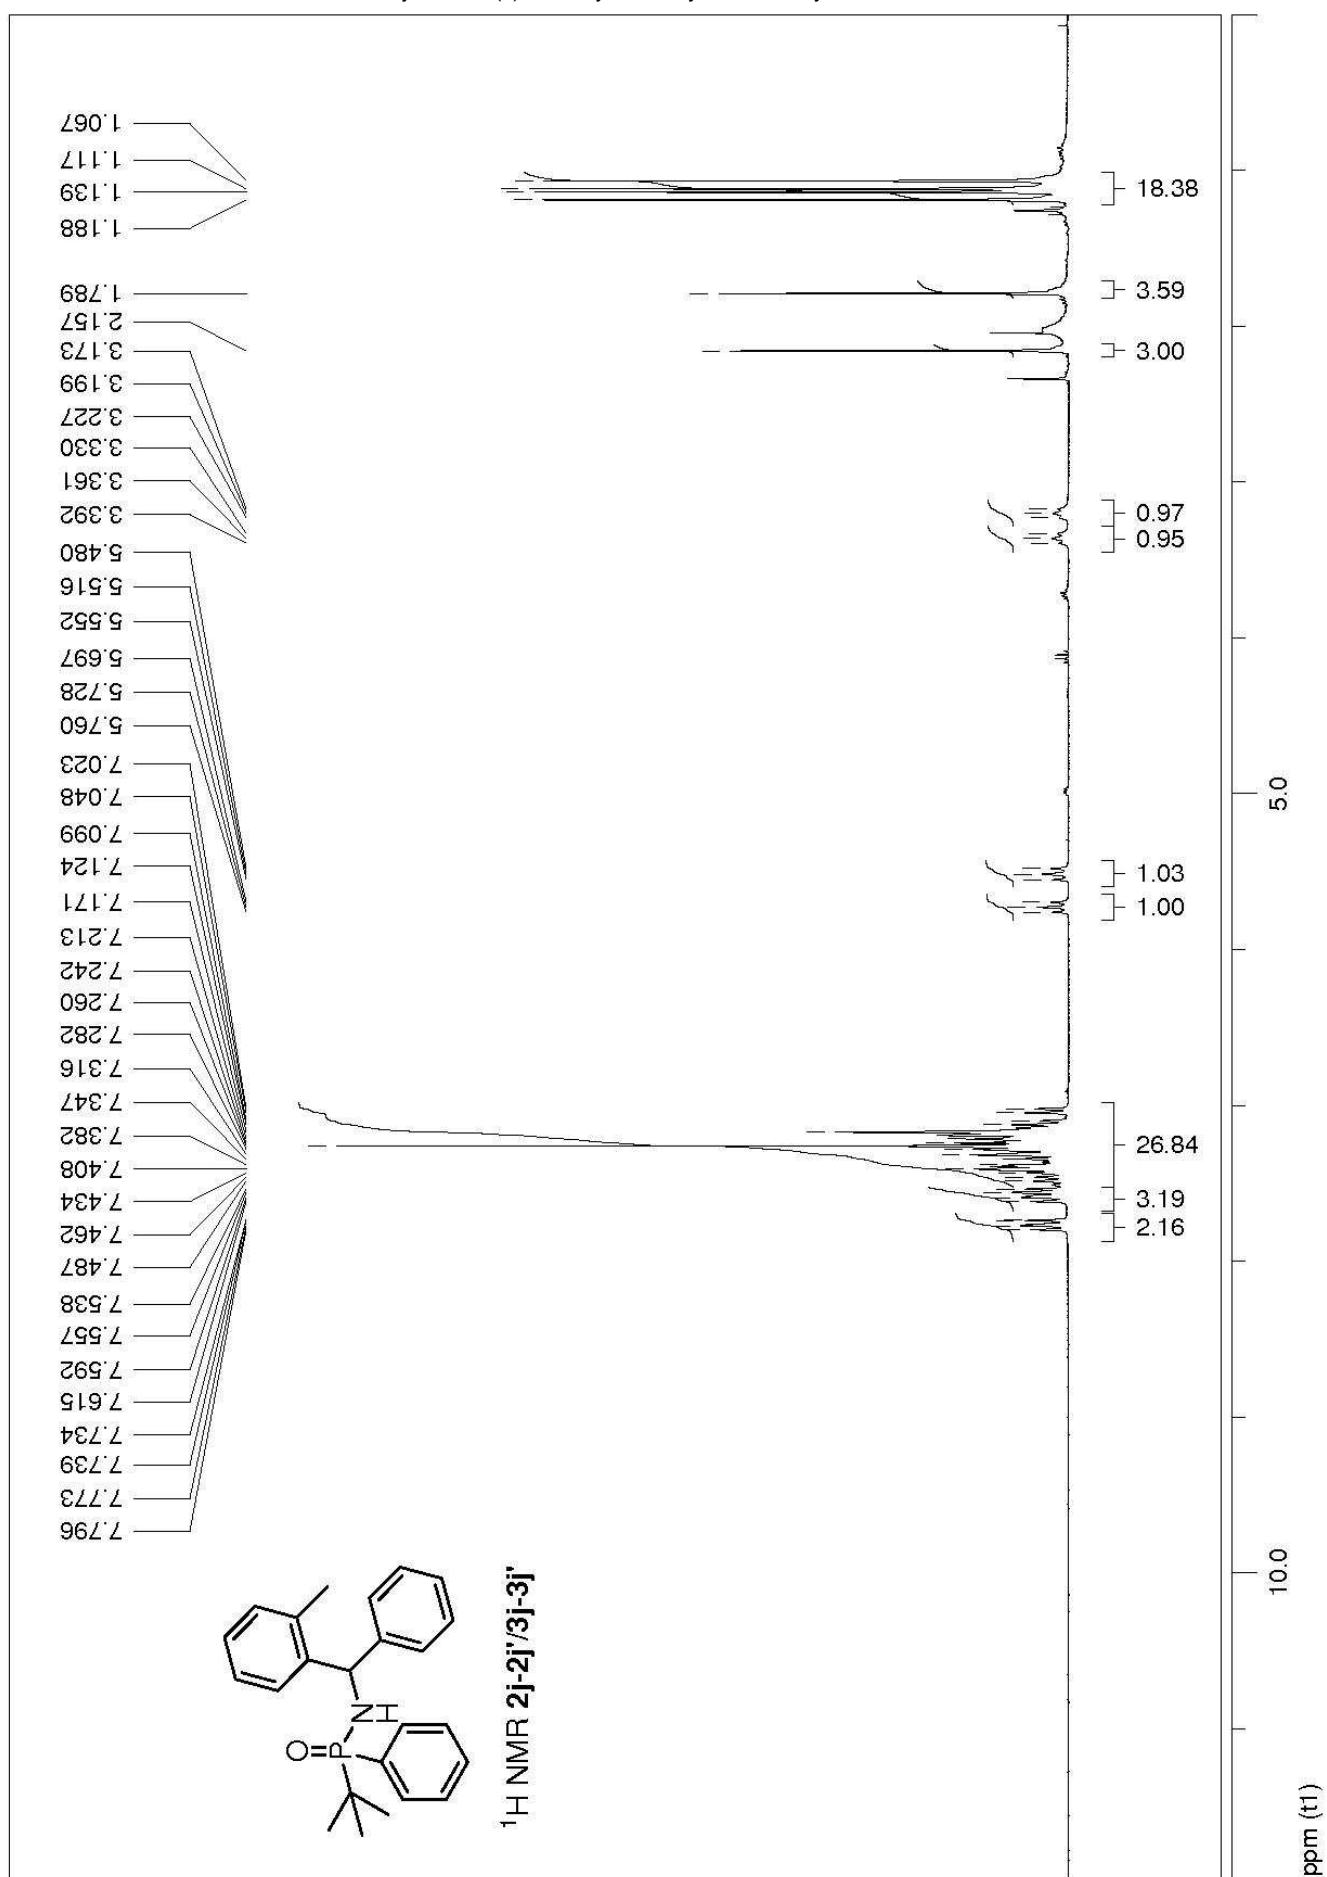

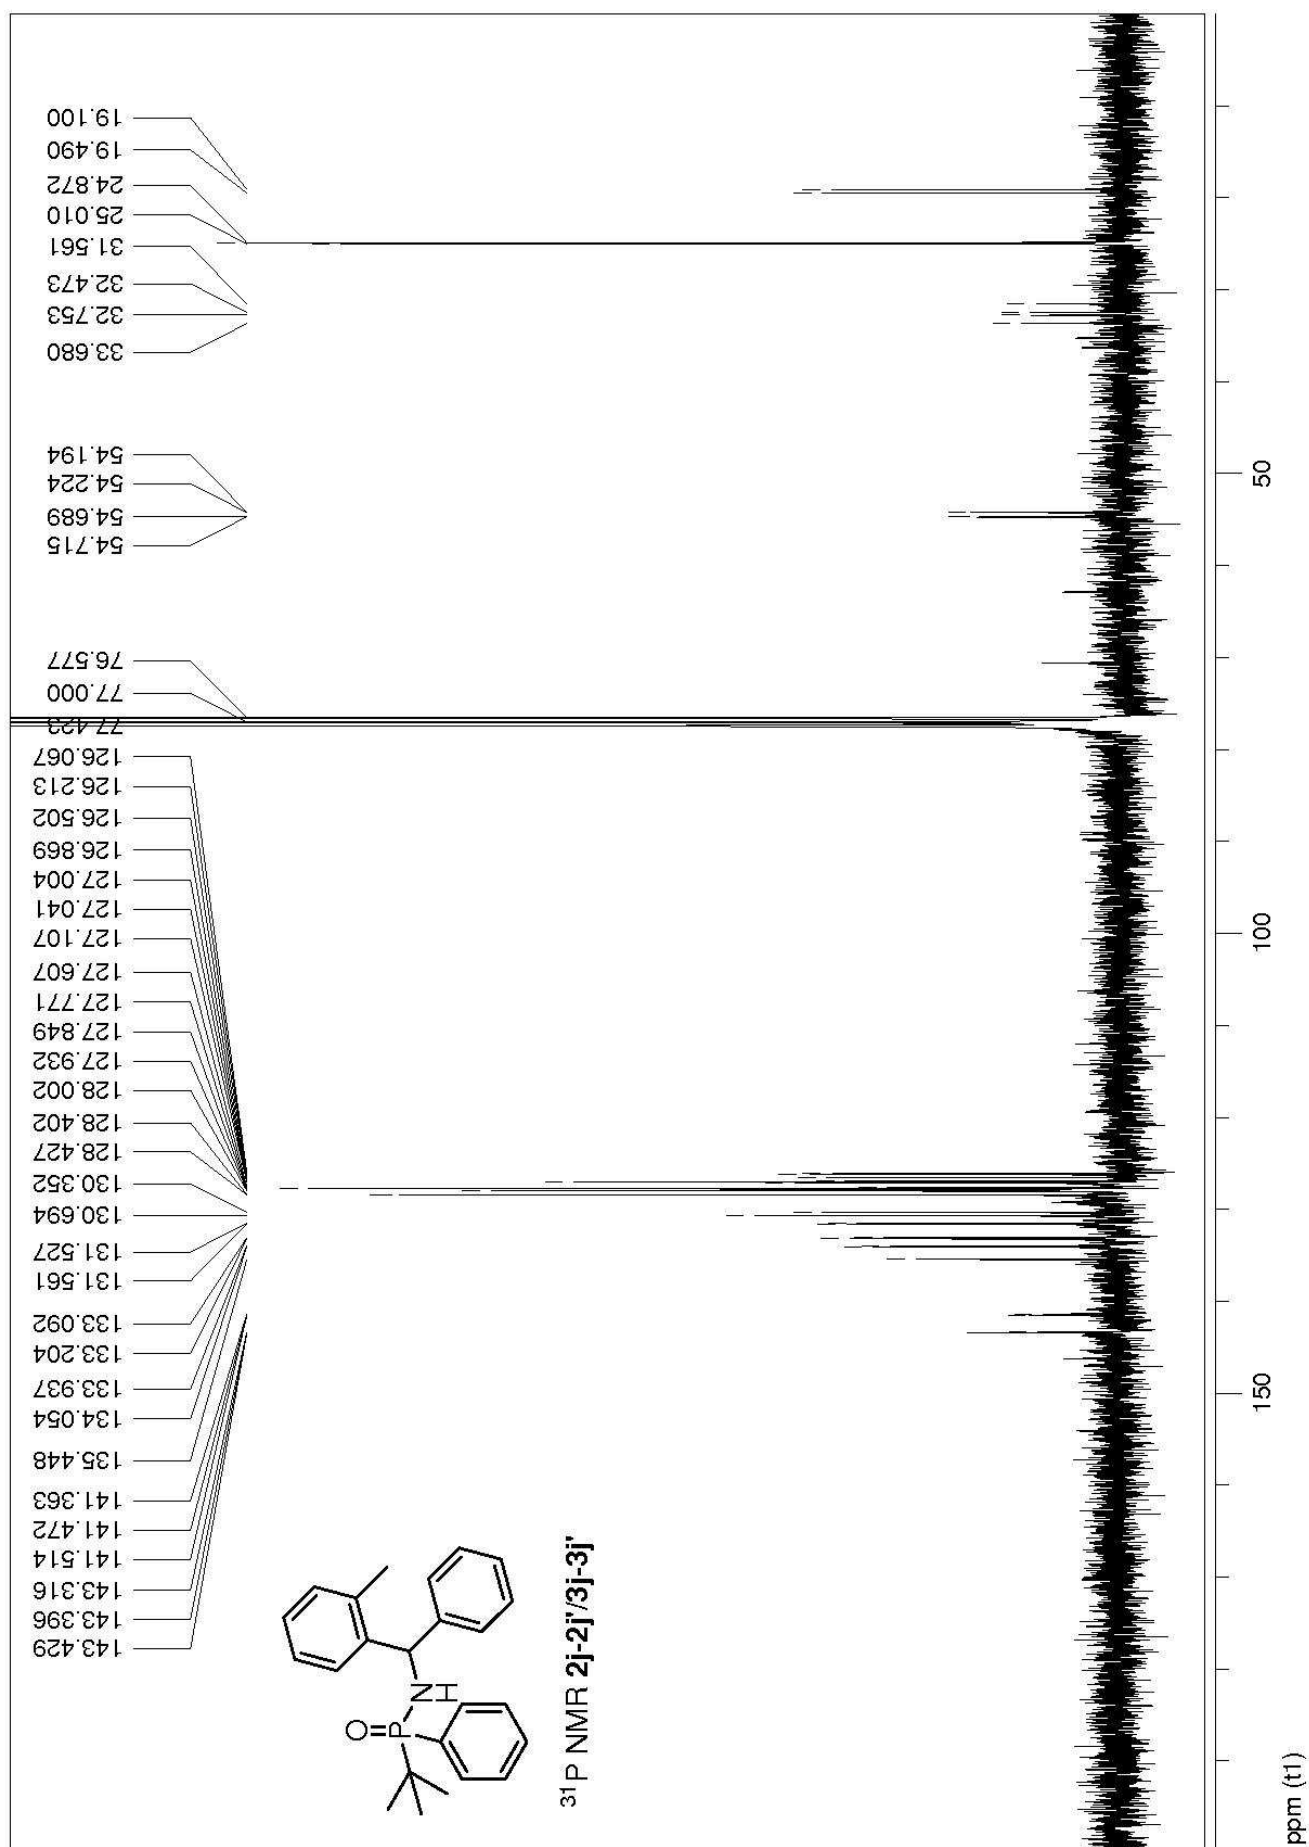

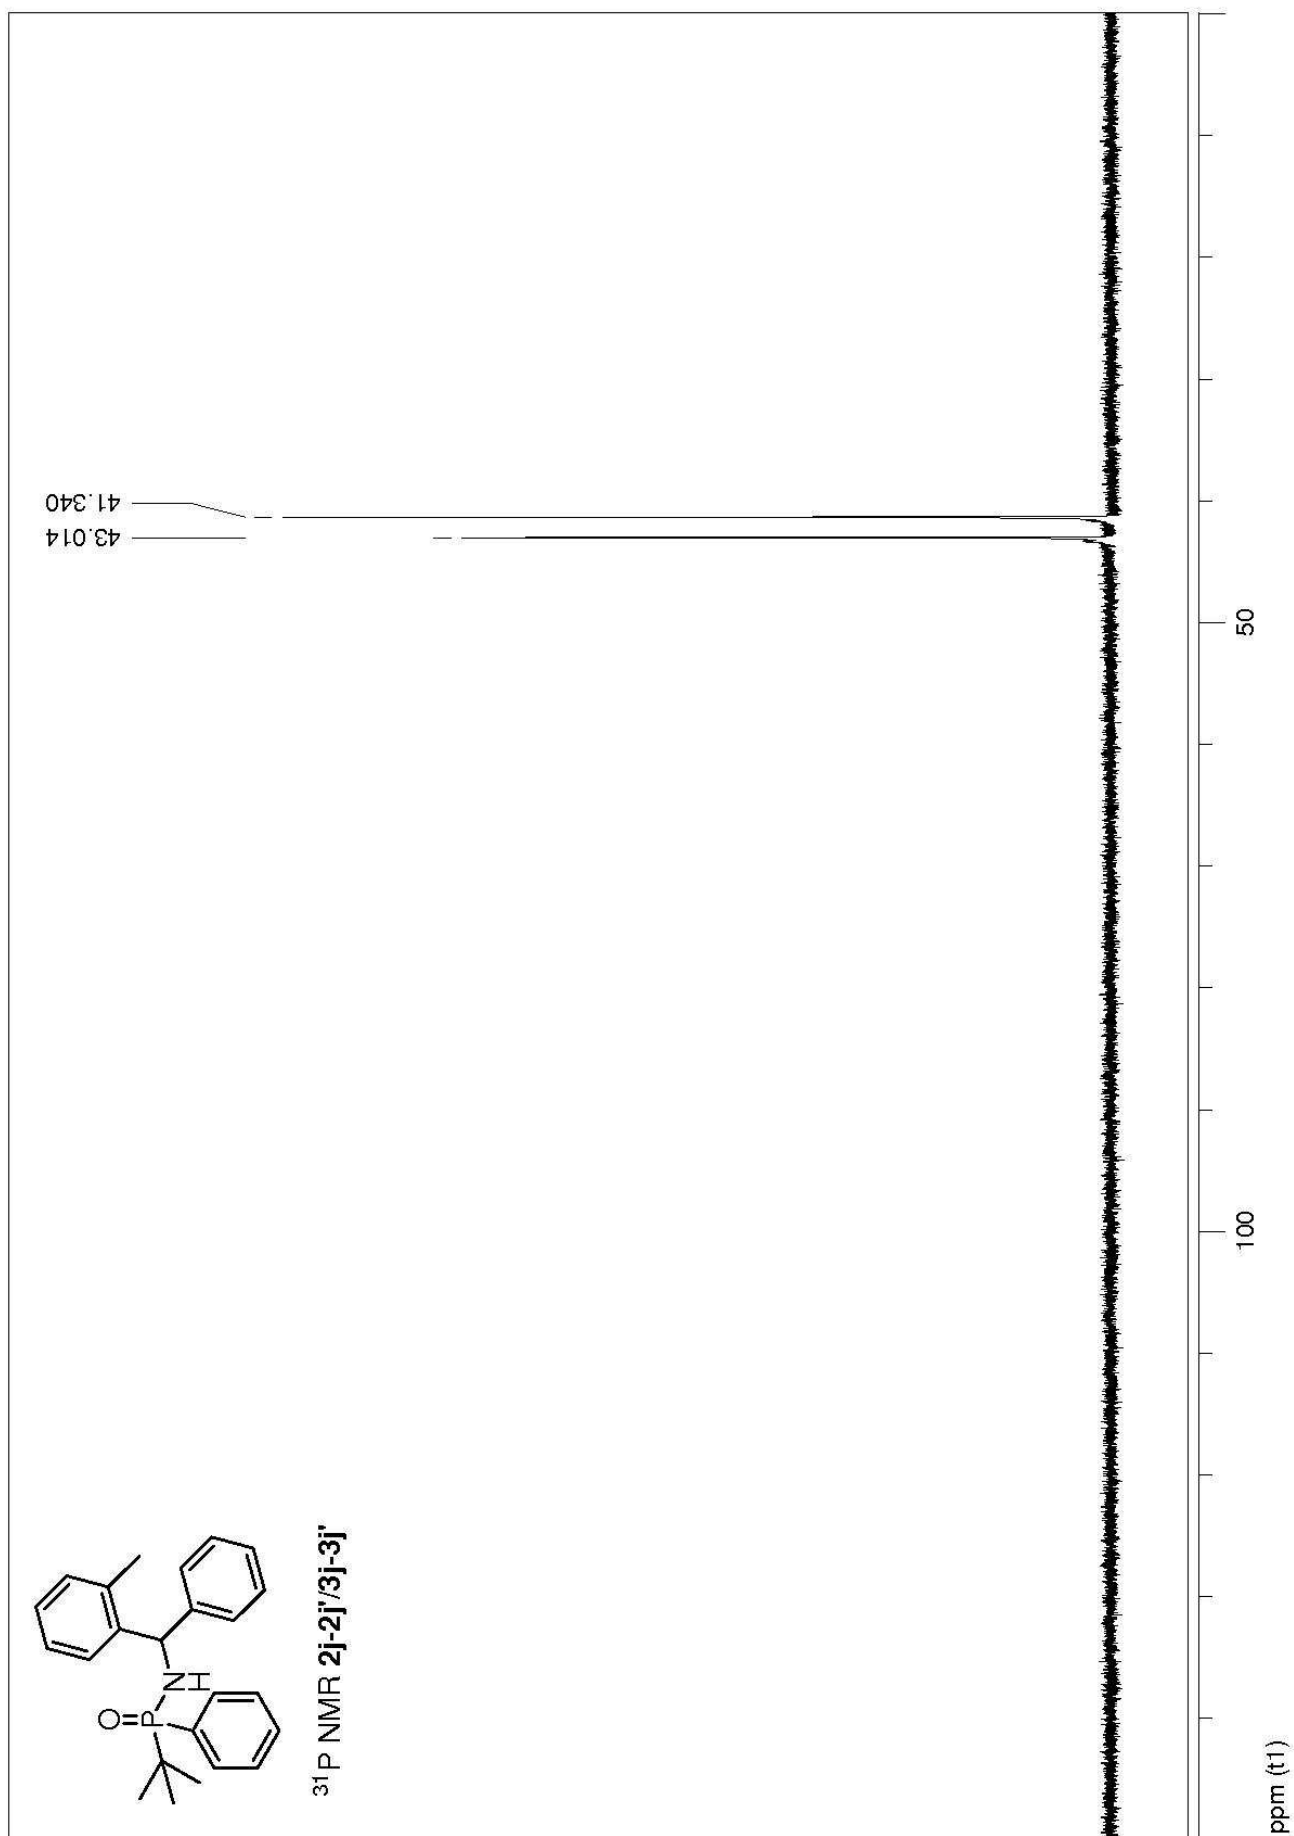

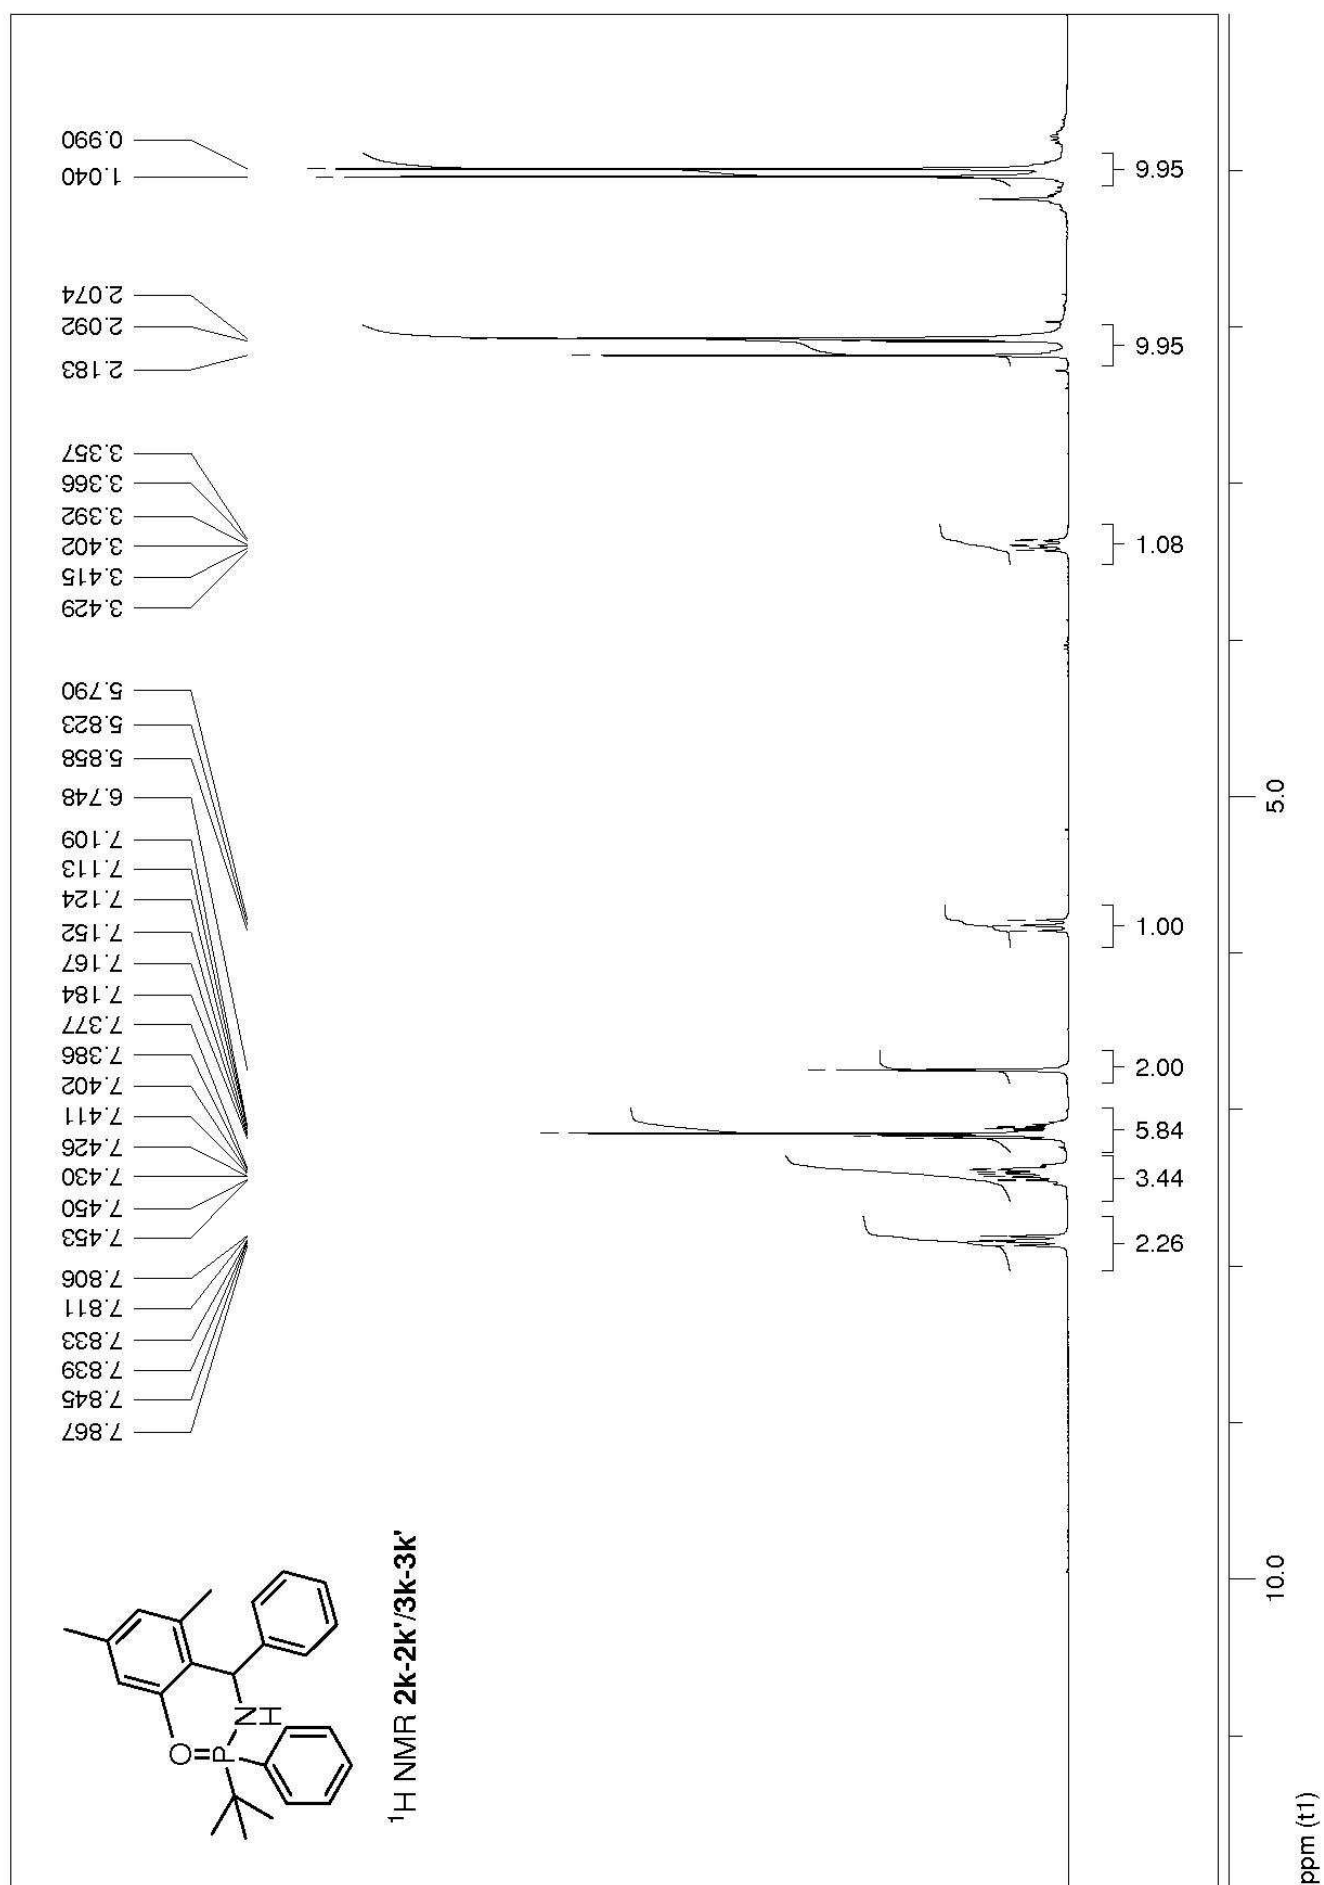

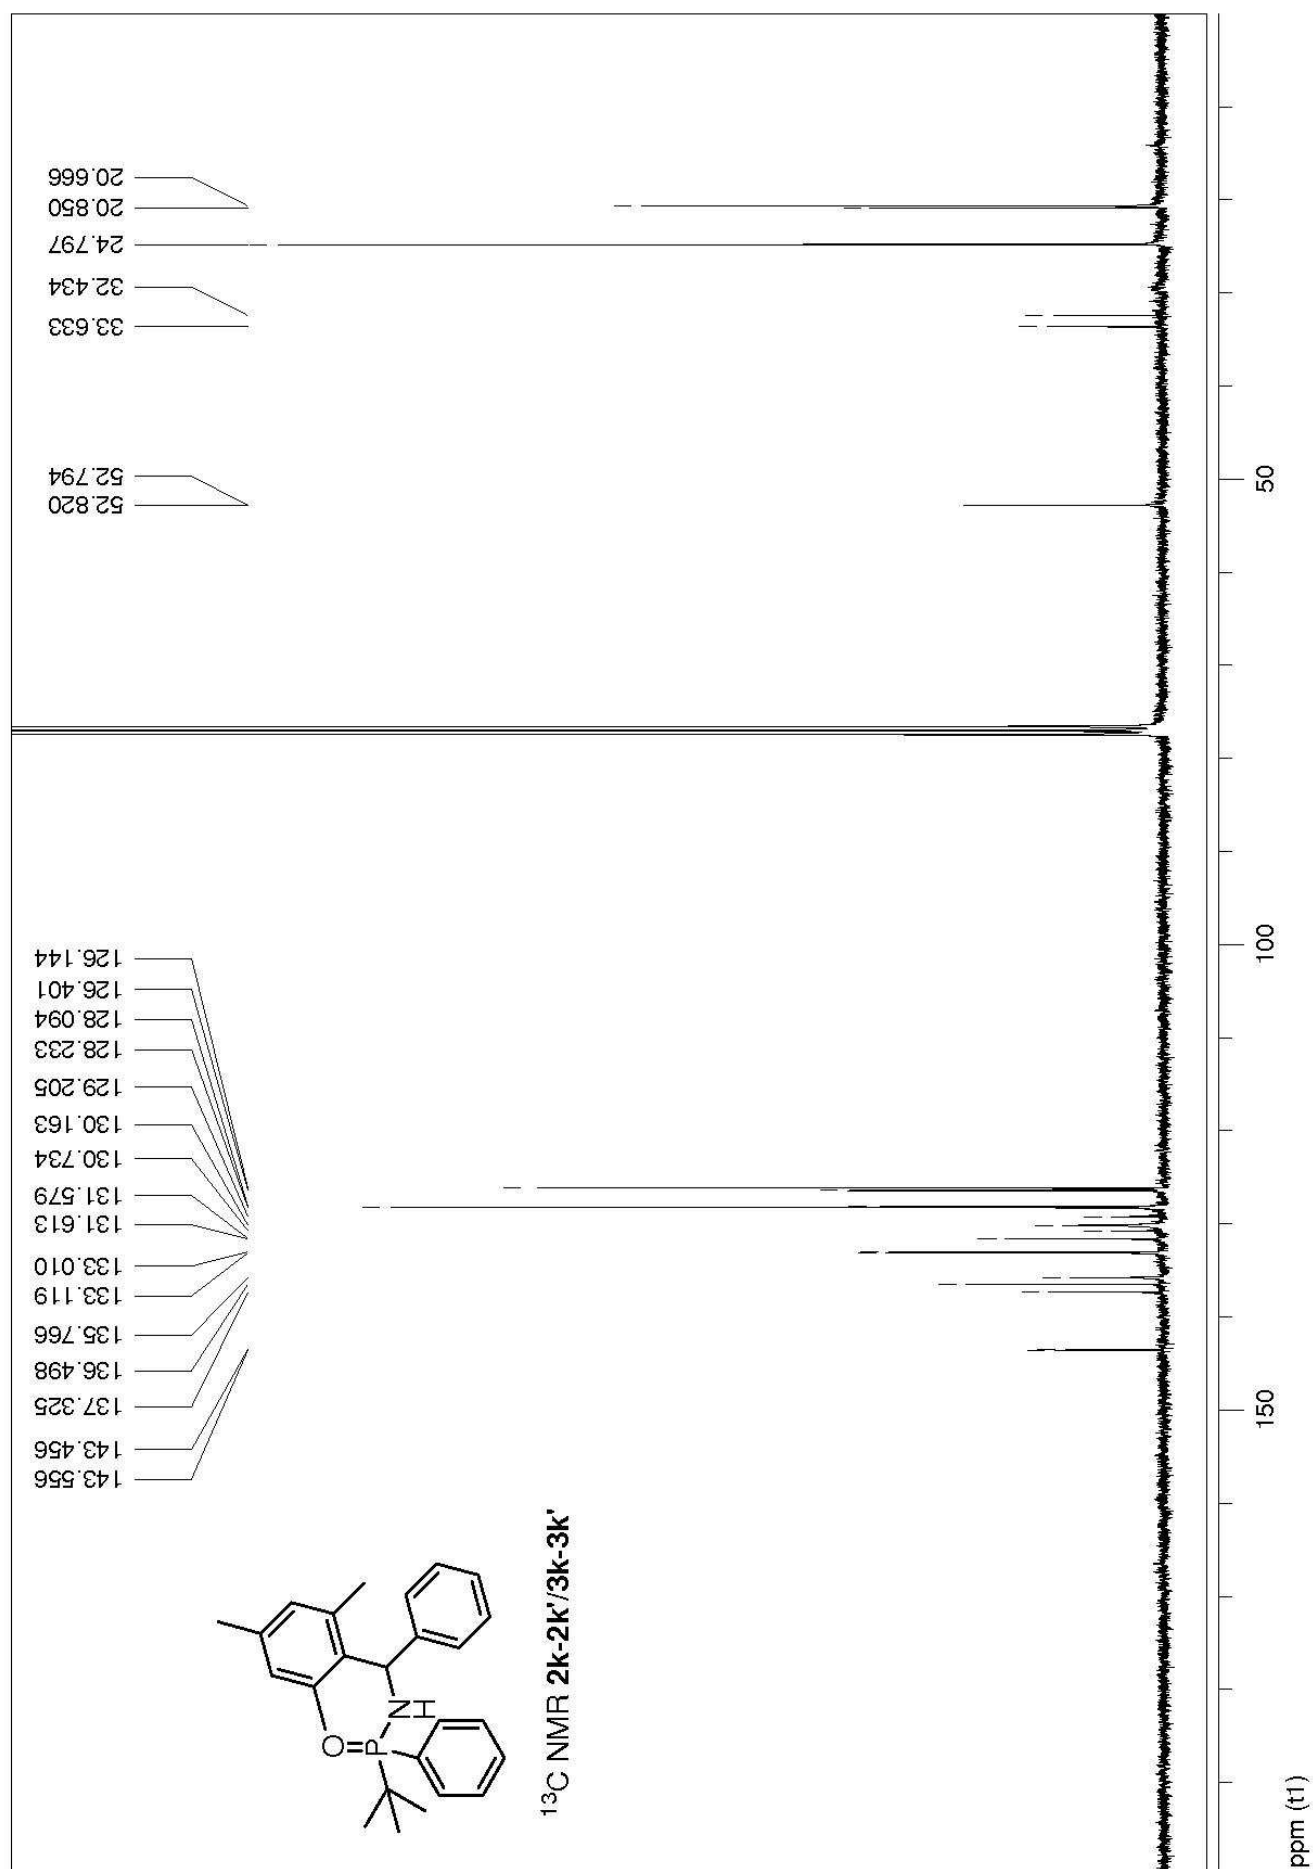



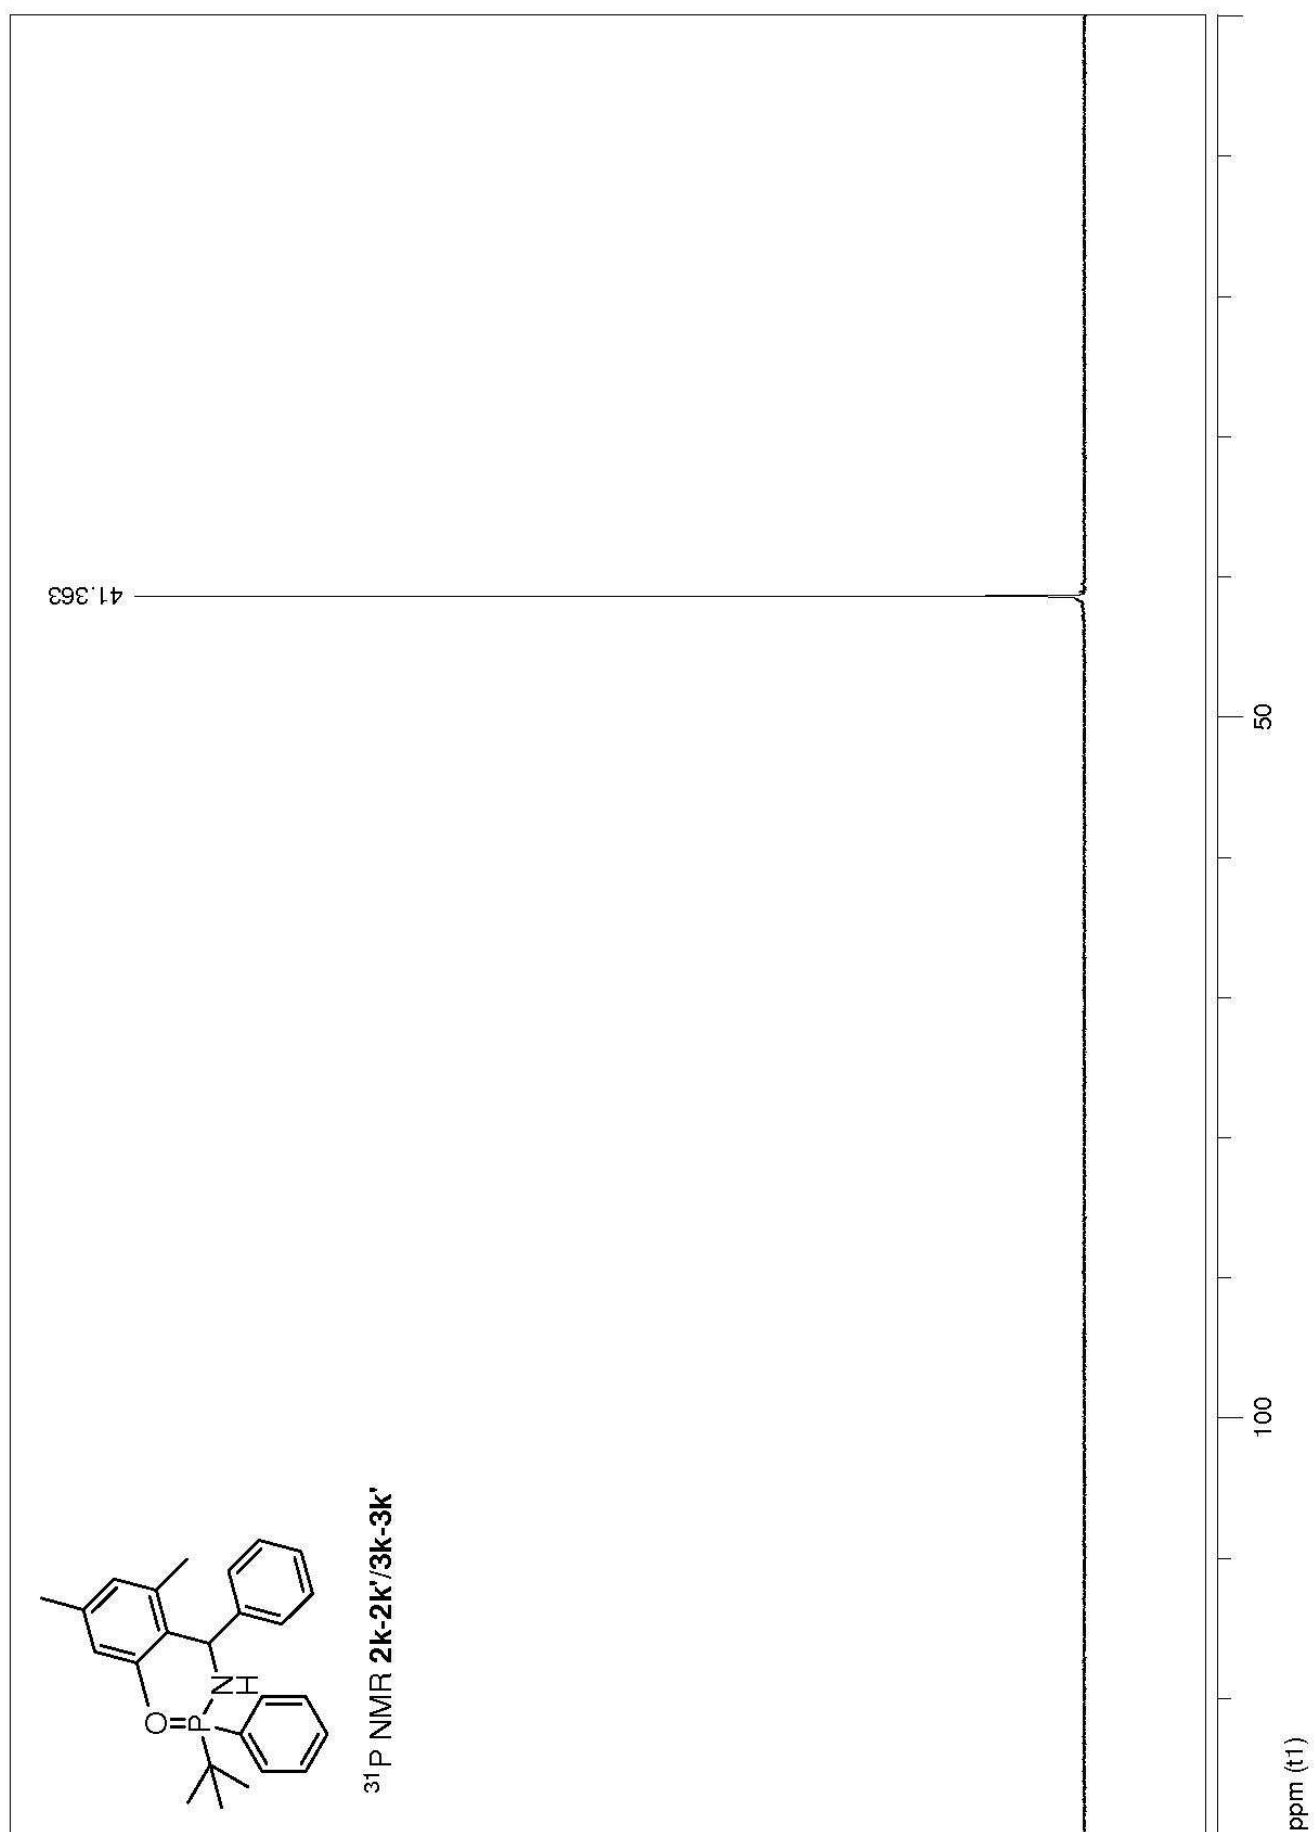

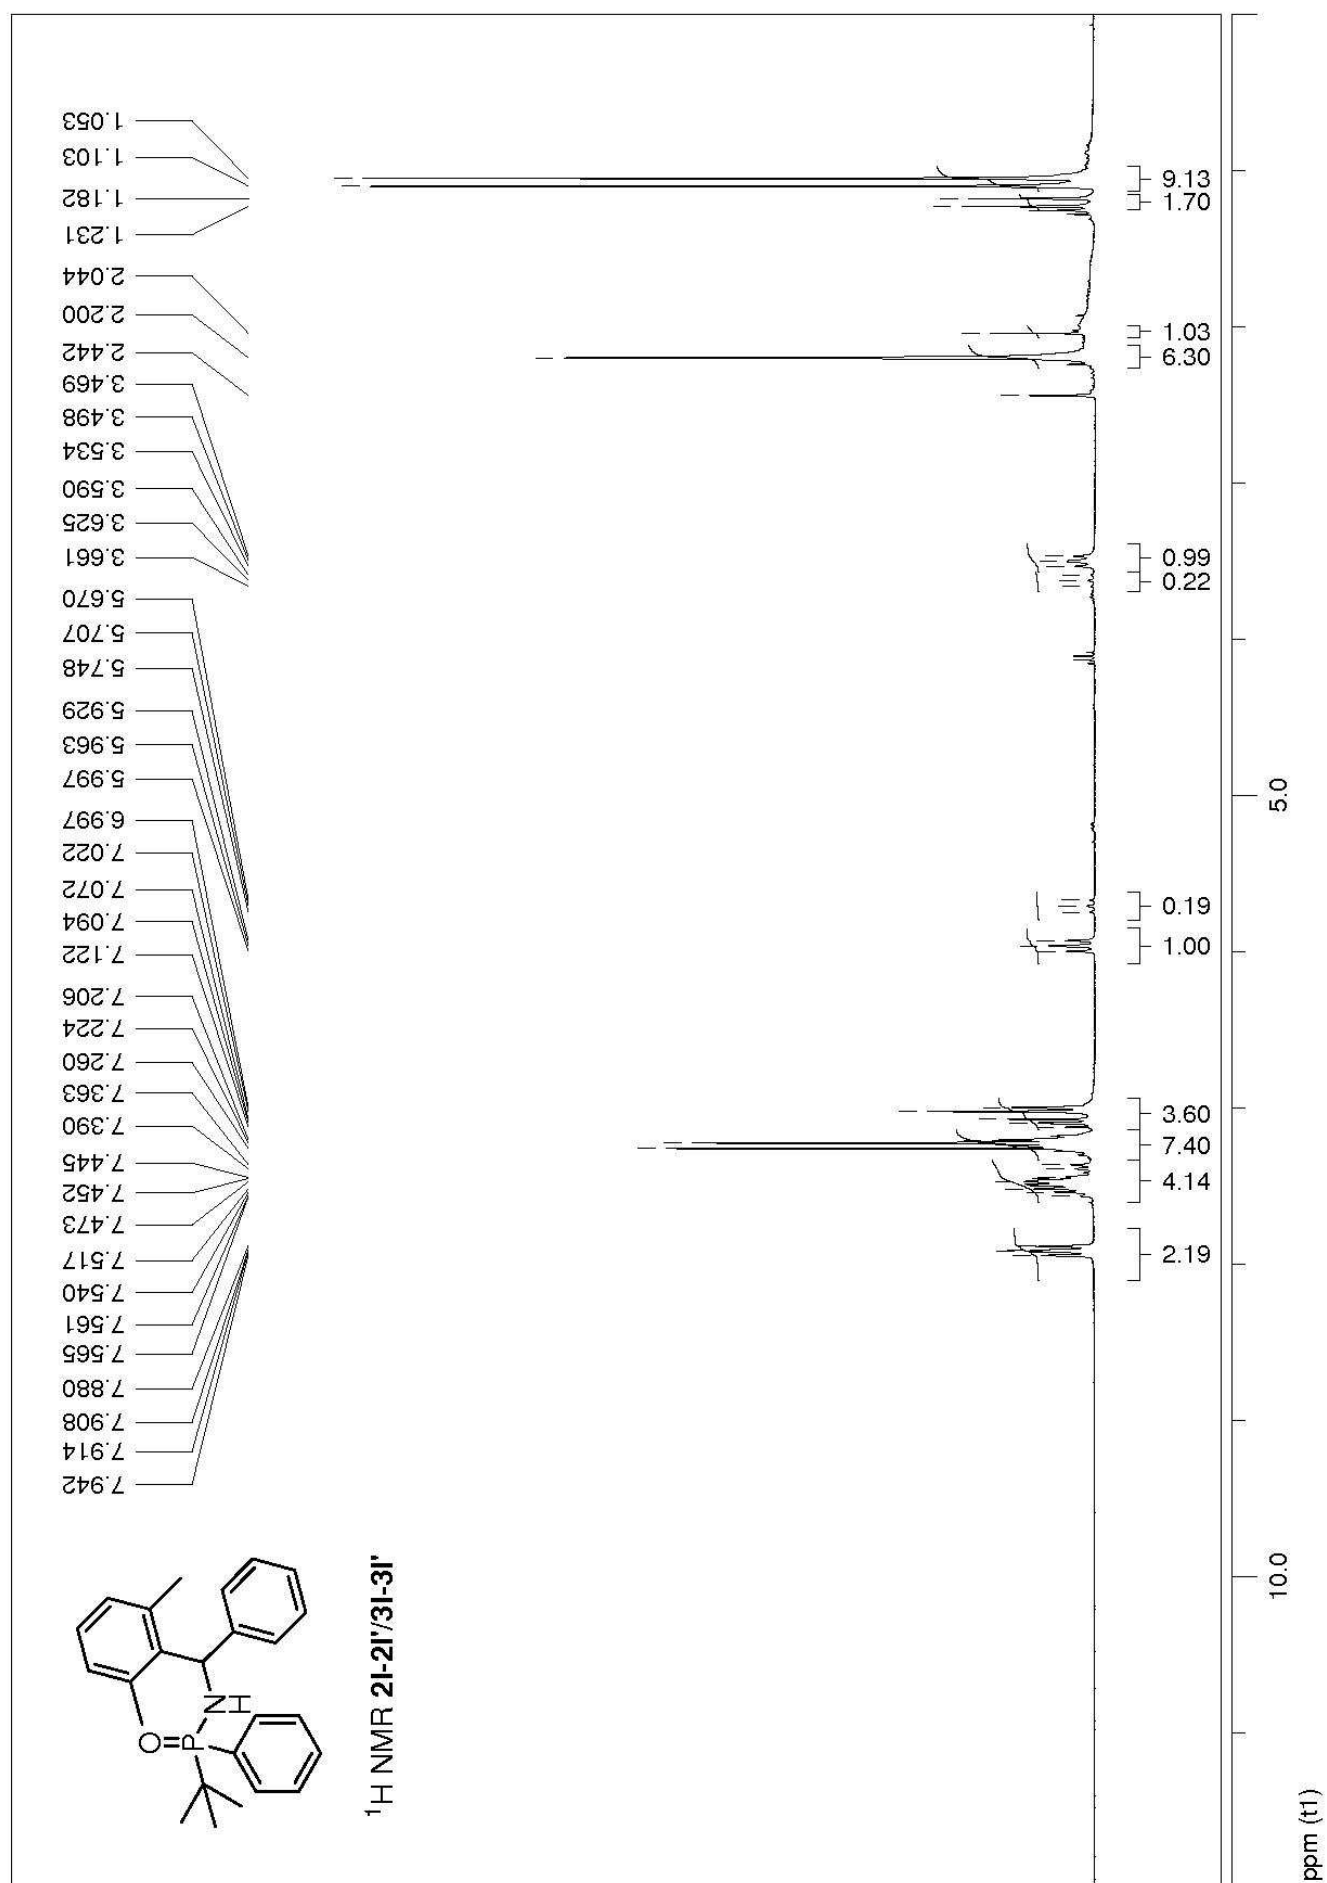

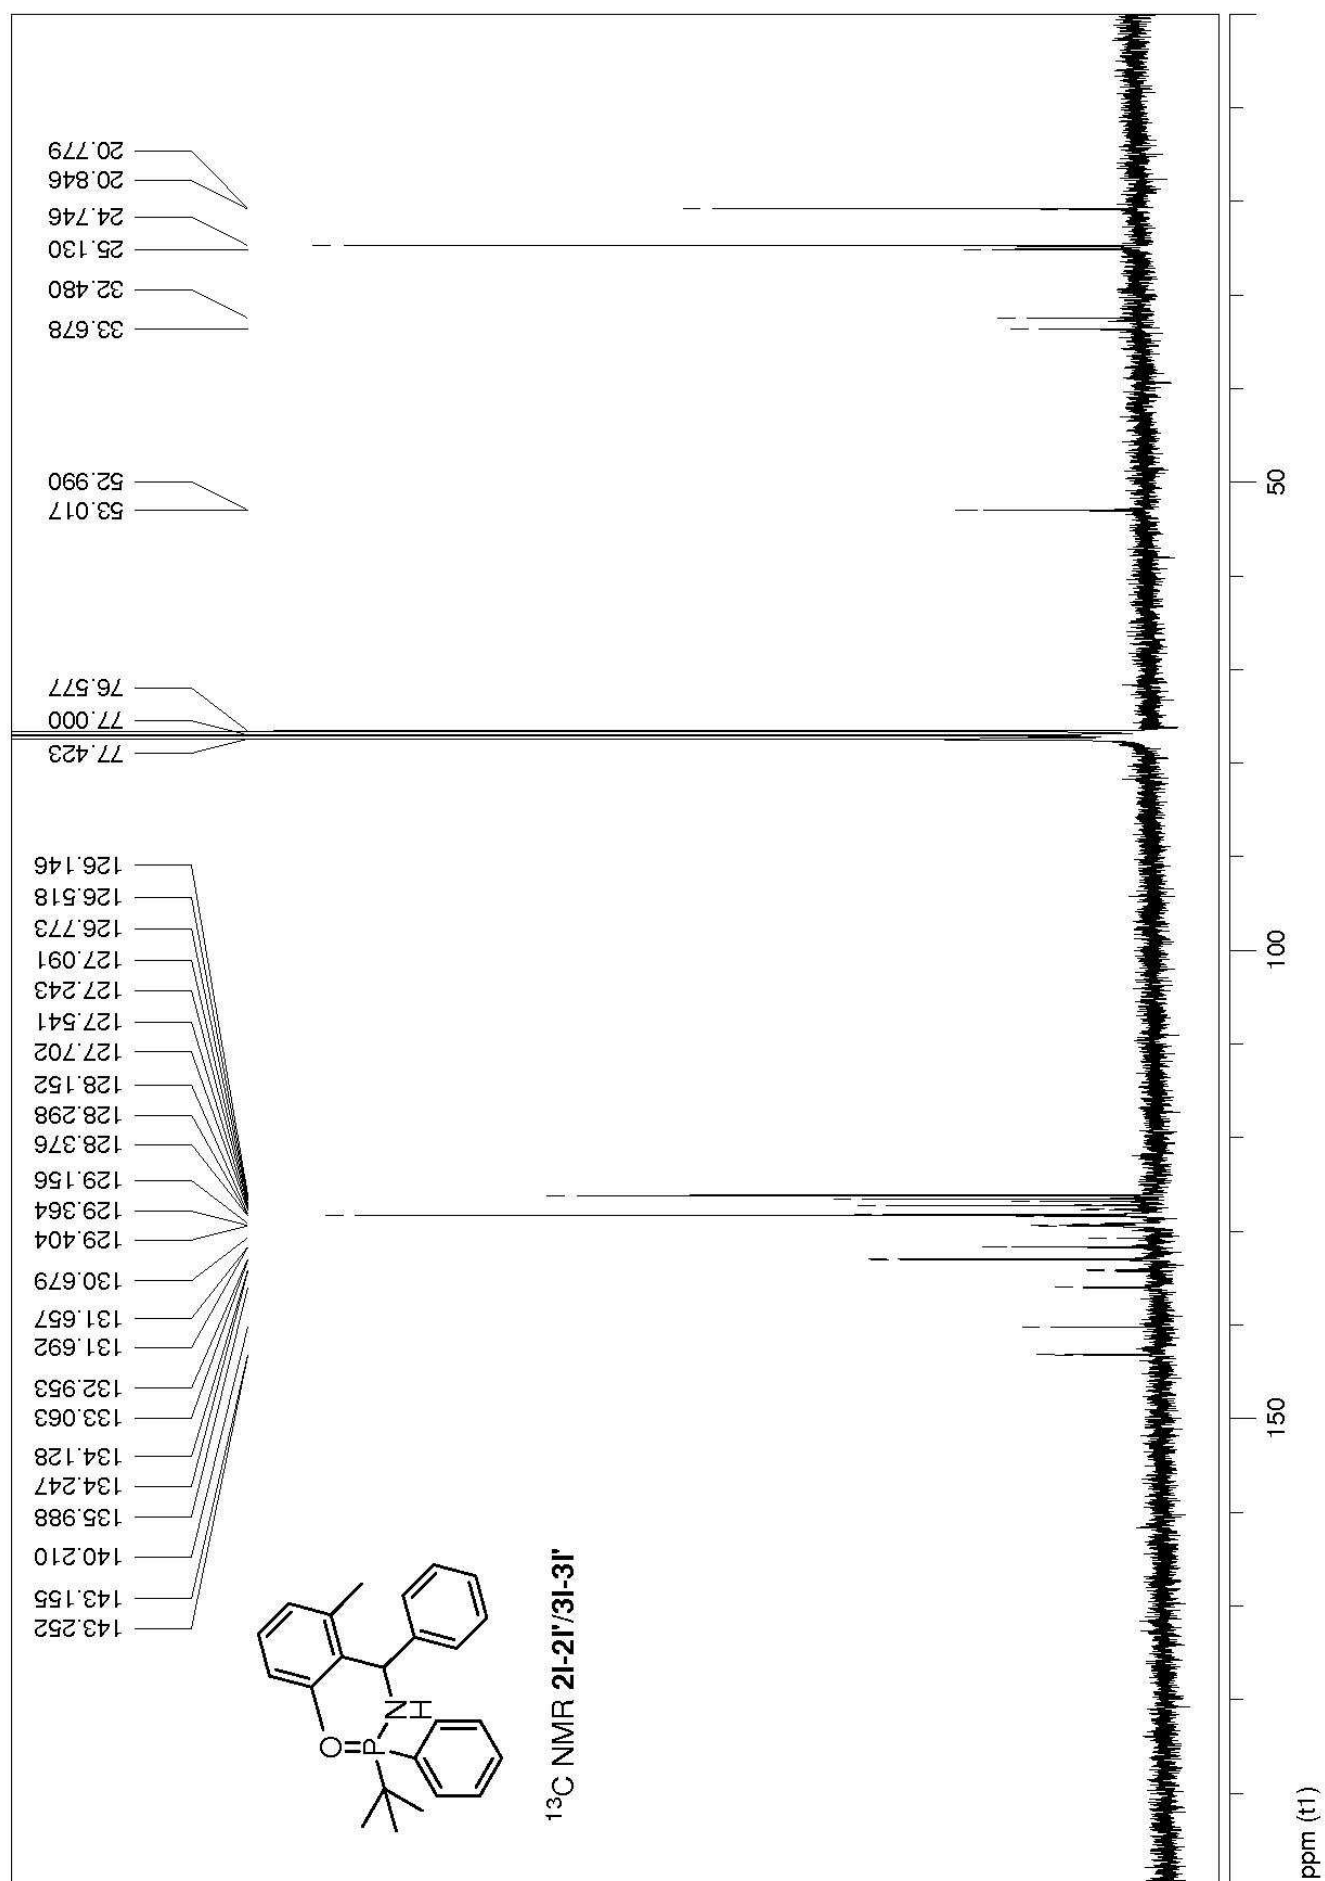

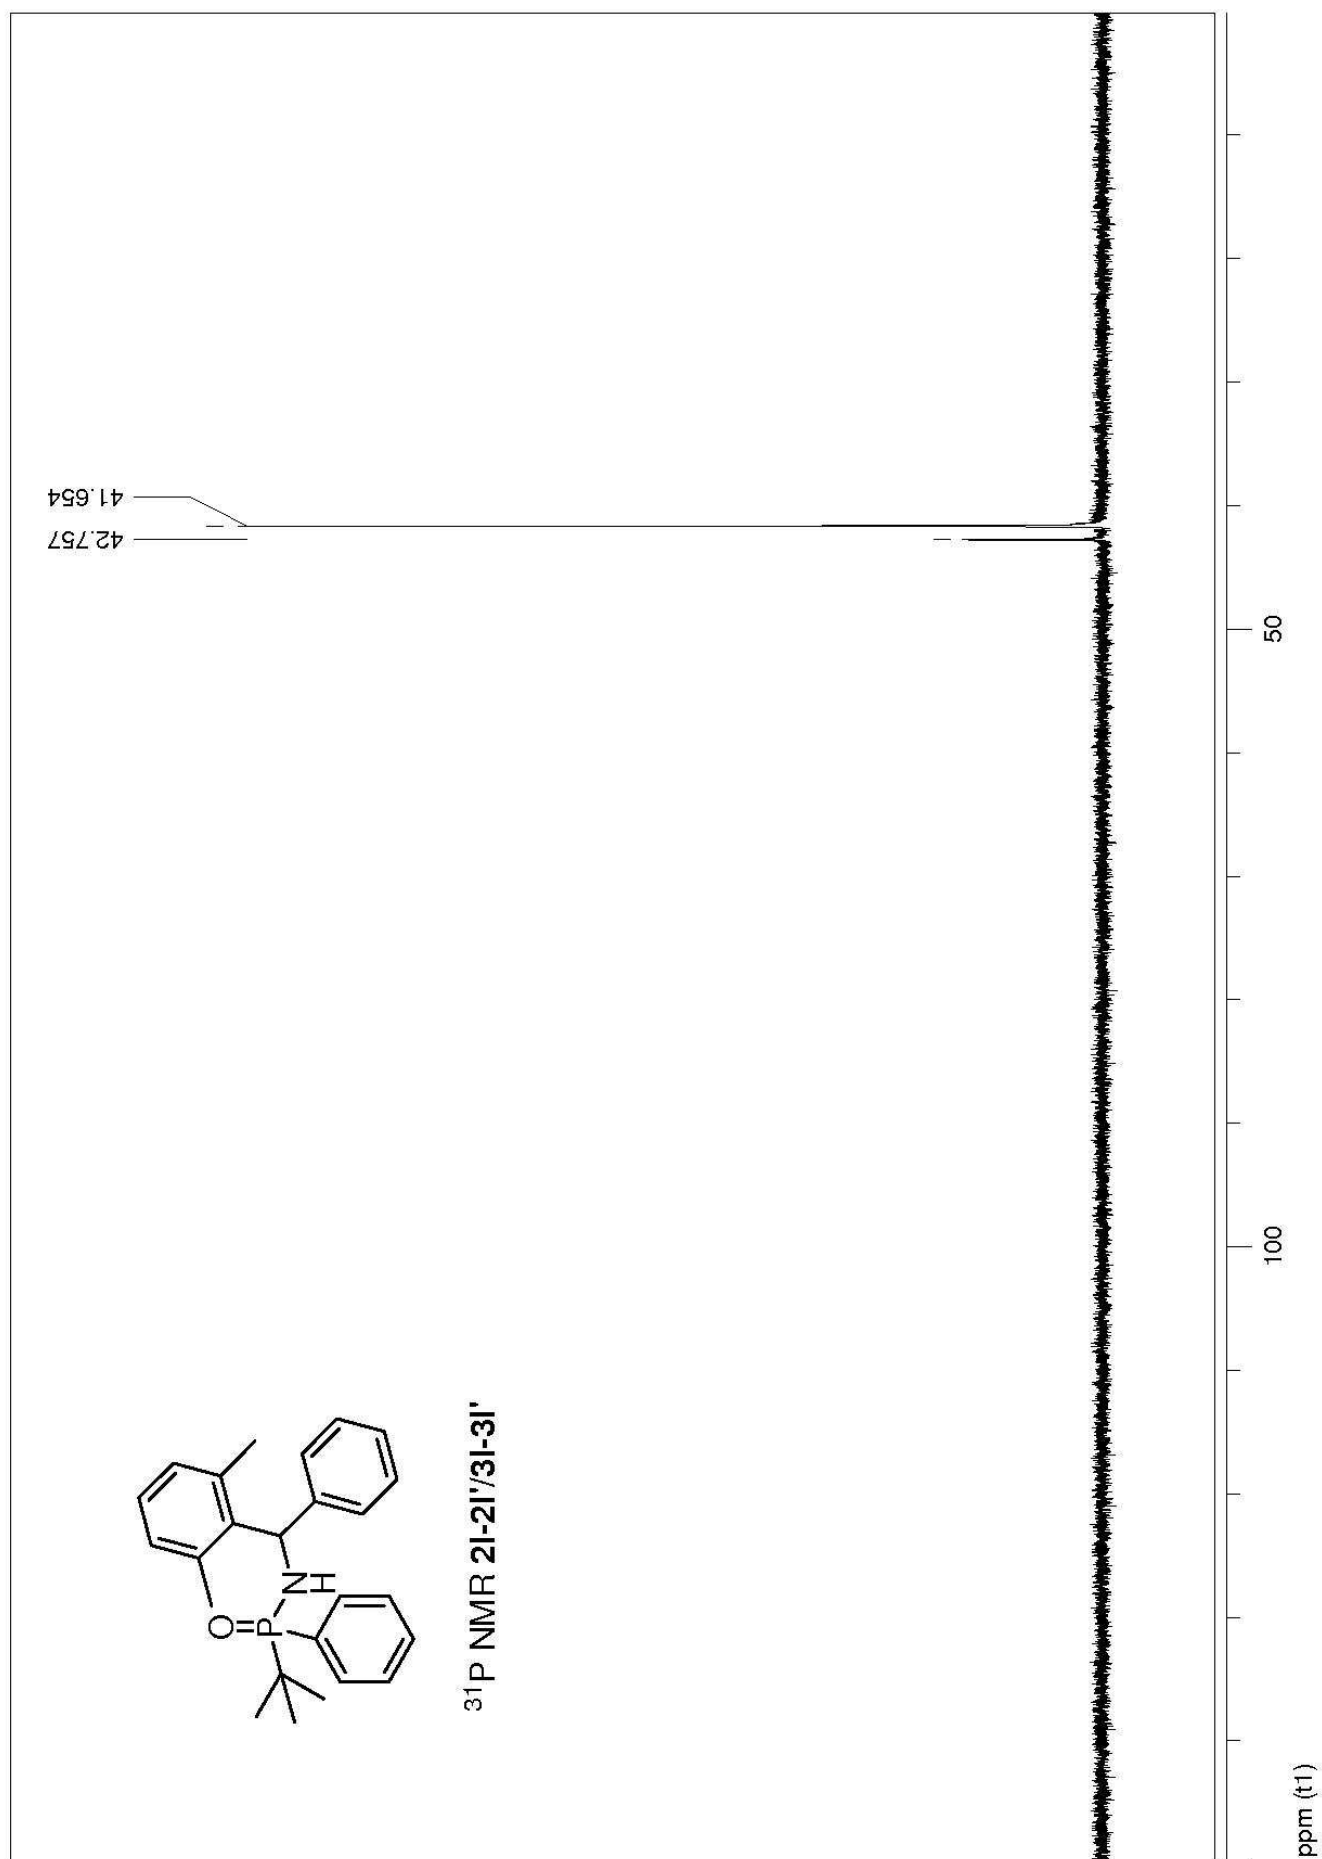

Supplement: b915781f.pdf [file b915781f.pdf]
